# Supplementary material
Source: Research Square preprint supplement (doi:10.21203/rs.3.rs-9879358/v1)
Supplement: Supplementary file 1 [file a3b6fb70d0bf7730b0551cbc.docx]

**Supplementary Information for**

**Evolution of tribosphenic molar and the placental-marsupial dichotomy**

Fangyuan Mao1,2*, Yilun Yu1,2, Chi Zhang1, Zifei Tian1,3, Dan Yang1, Yuxiao Gong1,3, Cunyu Liu4, Jin Meng2,5*

1Key Laboratory of Vertebrate Evolution and Human Origins, Institute of Vertebrate Paleontology and Paleoanthropology, Chinese Academy of Sciences; Beijing, 100044, China

2Division of Paleontology, American Museum of Natural History; New York, New York 10024, USA.

3Institute of Palaeontology, Yunnan Key Laboratory of Earth System Science, Yunnan University; Kunming 650500, China

4Beipiao Pterosaur Museum of China; Beipiao County, Liaoning Province, 122100, China.

5Earth and Environmental Sciences, Graduate Center, City University of New York; New York, 10016, USA.

*Corresponding authors. Email: maofangyuan@ivpp.ac.cn (F.M.); jmeng@amnh.org (J.M.).

**Supplementary Information Guide**

Extended Data

Figures and Table

Supplementary Text

I. Molar wear and occlusion

II. Postcanime count in Trechnotheria

III. Postcanime count in *Kielantherium* and *Arguinus*

IV. Tooth reduction

V. Systematic Paleontology

VI. Phylogenetic Analysis

Character List

Data Matrix

Strict Consensus (TNT, New Technology Search)

50% majorite-rule consensus (PAUP)

Strict Consensus (PAUP)

Apomorphic list

VII. References

**I. Molar wear and occlusion (Extended Data Figs. 5, 9)**

The holotype of *Kielantherium cuii* is unusual among Mesozoic tribosphenic mammals in having distinct wear facets on all molars, best preserved in the lower ones, which provides evidence about the tooth occlusion and replacement. The upper and lower molars from the same individual of *K. cuii* (*Jeholotherium antiquum* as well), also rarely preserved in Mesozoic Mammals, provide reliable evidence for understanding tooth occlusal relationships.

Functionally, it has been suggested that the talonid may be originally developed to prevent over-occlusion and supported some minor shearing during the evolution of mammalian dentition (Davis, 2011a). In mammaliaforms, such as morganucodontans, the wear facet could be very deep on the lateral surface and ventrally pass the cementoenamel junction of the lower molar (Jäger et al., 2019; Extended Data Fig. 5F); this facet should be homologous to the wear facet in the hypoflexid of “eupantotheres”. In “eupantotheres” that already developed the talonid, such as *Amphetherium*, *Palaeoxonodon* (Close et al., 2015; Panciroli et al., 2018), *Arguimus* (Dashzeveg, 1979), and *Nanolestes* (Martin, 2002), the shearing is still extensive. In these forms the paracone of the upper molar is lingually positioned and has an arc lingual surface, whereas the hypoflexid is usually a smoothly arced surface (hypoflexid groove) that matches the shape of the paracone. During chewing, the hypoflexid is for passage of the paracone (Butler, 1990; Schultz and Martin, 2014). When the wear continues, facets 1 and 3 (Crompton, 1971) may become confluent and the merged facet can extend ventrally to reach to or even pass the cementoenamel junction (Extended Data Figs. 5G, 5H). The talonid provides extra shearing crests but does not seem to function as a stop for over occlusion.

In contrast, the molar structure of *Kielantherium* is reorganized. In the upper molar, the metacone is lingually shifted, which already took place in *Peramus* and regarded as one of the most critical modifications in the pre-tribosphenic molar (Davis, 2011a). The hypoflexid of the lower molar is no longer a smoothly arced surface to receive the paracone alone; instead, it becomes an asymmetrically angular concavity with its anterior portion more lingually extended due to the widening and transversely extending of the protocristid. The reorganization of these structures reduces shearing in the hypoflexid and facets 1 and 3 could not become confluent even in the deeply worn molars of *K. cuii*. On the other hand, because of the pronounced talonid angle (Davis, 2011a), owing to a elongate hypocristid as well as the lingually extended paracone and metacone, the tooth wear at the talonid is extensive in *K. cuii*, as reflected by facet 3 on the mesiolabial side of the talonid, created by contact with the paracone, and by facet 4 between the distolabial side of the hypoconid and cusp f of the following tooth, created by contact with the metacone (Extended Data Fig. 5A-C). In contrast, the hypoconulid of *Peramus* is mainly interlocked between cusps e and f of the following molar so that the short hypocrestid of the talonid can bear limited, if any, wear facet 4 (Extended Data Fig. 5D). The holotype of *K. cuii* probably shows the utmost attrition of the talonid area in known pre- and basal-tribosphenic mammals. Even the tip of the hypoconid has been worn by shearing to form a sharp point. Such a wear pattern is partly due to the robust and lingually positioned paracone and metacone, which occlude tightly against the talonid to form a powerful shearing mechanism. This configuration indicates that the cusp of the hypoconid did not form a crushing contact to the trigon basin. The “double opposition” of Simpson (1936), typical for tribosphenic molar, has not been formed in *Kielantherium*.

It seems that development of an initial protocone originally functioned as a stop mechanism to prevent over shearing occlusion of molars. Although the tooth wear is extensive, the wear facets do not go beyond the cementoenamel junction in *Kielantherium* because of the presence of the incipient protocone and related crests. The wear facet 5 on the preprotocrista is present in the upper molar of *K. gobiense* (Loptin and Averianov, 2006a, 2007) and *K. cuii*, but it does not suggest crushing function of the tribosphenic molar because the preprotocrista is lower than the protocone and cannot reach to the floor of the talonid basin. It is merely created by contact (overlap) with the distal metacristid so that the wear facet is horizontal (relative to the occlusal surface) on top of the preprotocrista (Extended Data Fig. 9). This contact effectively provides a stop mechanism to prevent further shearing occlusion so that the upper molar cusps cannot reach to any deeper position against the lower molar. In *K. cuii,* facet 6 is also present (Extended Data Fig. ). The sloped facet 6 is small and was probably created by contact with the entocristid along the distolingual portion of the talonid; it supplies some minor shear. Given the small protocone and the talonid basin, the crushing contact would be minor. The reorganization of the molar structures of *Kielantherium* marks the beginning of a functional shift, where crushing is introduced but remains subordinate to shearing. The dentitions of *Kielantherium*likely represent the terminal shearing dominant tooth occlusion in trechnotherians.

As the protocone enlarged in more advanced tribosphenidans, the paracone and metacone are labially displaced and the talonid is widened, such as *Liaodelta* and *Jeholotherium*, it would increase crashing function between the protocone and the talonid basin as well as the hypoconid and the secondary trigon basin, whereas shear function on the labial surfaces of the lower molar (in the hypoflexid and talonid) would be reduced, as shown in some extant tribosphenic mammals, such as *Didelphis* (Schultz and Martin, 2014; Schultz et al., 2018). Thus, the evolution of tribospheny represents a process of optimization, or trade-off, of shearing and grinding functions in a single dental occlusal system.

The tooth occlusal relationship of *K. cuii* further supports interpretations that the distal metacristid (Fox, 1975; or the oblique crest of Butler, 1990) linking the metaconid and hypoconid enhances shearing function (Fox, 1975; Butler, 1939; Crompton, 1971; Davis, 2011a; Schultz and Martin, 2014) and the view that wear on the distal metacristid of Aegialodon resulted from contact with the paracone alone (Kermack et al., 1965; Clemens and Mills, 1971; Fox, 1975). These structures and wear patterns reinforce homology of the distal metacristid from Kuehneotherium to tribosphenidans (Fox, 1975), which further suggests a tribosphenic ancestry rooted more likely in Kuehneotherium, Megazostrodon, and *Camurocondylus* that have an embrasure occlusion (Crompton, 1974; Crompton and Jenkins, 1968; Jenkins and Crompton, 1979; Jäger et al., 2019; Mao et al., 2024b).

**II. Postcanime count in Trechnotheria**

Based on available material known at the time, predominantly lower dentitions, Simpson (1936: p943) wrote: “A formul of 5-3.1.4.4/4-3.1.4.4 could give rise to that of any marsupial or placental by reduction, with secondary increase in rare cases.”

“From all these data, it seems probable that the basic formula for therian mammals as a whole, dating back to the very origin of this group or of the Mammalia, included four incisors in each jaw, one canine, four premolars, and not less than four molars. Probably the molars were more numerous than four, quite possibly eight.” Furthermore, Simpson (ibid) proposed the 4P-7(8)M/4p-7(9)m formula as primitive for “pantotheres” and thought it could give rise to both placental and marsupial formulas.

The following list summarized the postcanine counts from some important pre-tribosphenic and tribosphenic taxa. Most non-zatherian trechnotherians possess eight or more postcanine teeth, typically comprising four premolars and four or more molars or equal number of premolars and molars. Except for some eutherians, it is uncommon that the premolars are more than the molars in trechnotherians.

| Taxa | Postcanine count | References |
| --- | --- | --- |
| *Kuehneotherium* | 6p-6m(p5or6-m5or6) | Gill et al., 2014; Kielan-Jaworowska et al., 2004 |
| *Tinodon* | 3p-4m | Kielan-Jaworowska et al., 2004 |
| *Amphiodon* | 4p-4m | Simoson, 1929; Kielan-Jaworowska et al., 2004 |
| *Amphitherium* | 4p-7m | Simpson, 1936; Prothero, 1981 |
| *Amphitherium* | 5p-6/7m | Butler and Clemens, 2001 |
| *Palaexonodon* | 5p-5m | Close et al., 2015; Panciroli et al., 2018 |
| *Laolestes* | 4p-8m | Simpson, 1936; Butler and Clemens, 2001 |
| *Amblotherium* | 4p-7/9m | Simpson, 1936 |
| *Henkelotherium* | 4p-6m | Luo and Martin, 2023 |
| *Dryolestes* | 4p-8m | Martin, 1999 |
| *Paurodon* | 2/3p-4/5m | Averianov and Martin, 2015 |
| *Guimarotodus* | 4p-8m | Martin, 1999 |
| *Krebsotherium* | 4P-8M | Martin, 1999 |
| *Mozomus* | 5p-5m | Averianov et al., 2010 |
| *Akidolestes* | 5P (?)-5M (?)/5p-6m | Li and Luo, 2006 |
| *Lactodens* | 3P-6M/5p-6m | Han and Meng, 2016; Mao et al., 2022 |
| *Spalacotherium* | 4p-6m | Kielan-Jaworowska et al., 2004 |
| *Zhangheotherium* | 2P-5M/2p-6m | Hu et al., 1997 |
| *Heishanlestes* | 4p-6m | Hu et al., 2005 |
| *Maotherium* | 2P-4M/3p-6m | Rougier et al., 2003 |
| *Maotherium* | 1P-5M/1p-6m | Ji et al., 2009 |
| *Origolestes* | 3P-4M/4p-5m | Mao et al., 2020a |
| *Nanoleste* | 5p-5m | Martin, 2002 |
| *Anebodon* | 5P-3M/4p-4m | Bi et al., 2016 |
| *Anebodon* | 3P-5M/2p-6m | Our interpretation, as similar to *Maotherium* |
| *Peramus* | 4P-4M/4p-4m | Simpson, 1936; Clemens and Mills, 1971 |
| *Peramus* | 5P-3M/5p-3m | McKenna, 1975 |
| *Manchurodon* | 4p-?4m | Kielan-Jaworowska et al., 2004 |
| *Arguimus* | 4p-4m | Butler and Clemens, 2001; this study |
| *Kielantherium* | 4P-4M/4p-4m | This study |
| *Liaodelta* | ?-4M | This study |
| *Jeholotherium* | 5P-3M/5p-3m | This study |

**III. Postcanime count in *Kielantherium* and *Arguinus***

An uncertainty existed about postcanime number in *Kielantherium* and *Arguinus,* which has impacted interpretation of the primitive postcanine formula of therians. Based on the partial mandible of *Kielantherium* *gobiense* (holotype, GI PST 10-16), Dashzeveg and Kielan-Jaworowska (1984: p224) proposed that “four (and not three as postulated by McKenna) molars were primitive for the Tribosphenida” and advocated nine (5p-4m) postcanines as primitive for Tribosphenida, which was adopted by others (Wang et al., 2025). The inferred nine postcanine condition partly stemmed from the ambiguity of the broken mesial alveolus in GI PST 10-16, which Dashzeveg and Kielan-Jaworowska (1984: p223) described it as: “might be for p1 or for the canine”. Nonetheless, the authors chose to identify “the alveoli in front of the molars as belonging to p2-p5, rather than to p1-p4”, implying that there are five premolars in GI PST 10-16. As noted by Clemens and Lillegraven (1986), the interpretation of five premolars in *K. gobiense* was bolstered with the observation that some Cretaceous eutherians from North America (Lillegraven, 1969; Clemens, 1973; Fox, 1979; Clemens and Lillegraven, 1986) and Asia (Kielan-Jaworowska, 1981; Kielan-Jaworowska and Dashzeveg, 1989; Sigogneau-Russell et al. 1992; Averianov and Archibald, 2015) had five premolars.

In their original study, Dashzeveg and Kielan-Jaworowska (1984) did not describe the broken alveolus in question. To clarify this ambiguity, we show in Extended Data Fig. 4A-D, based on a cast of GI PST 10-16, that the partial mesial alveolus is notably thicker in diameter than the alveoli distal to it. The size of the partial alveolus is unlikely for a mesial premolar. We are unaware of any Mesozoic mammal that has p1 notably larger, with root thicker, than p2. It is most likely that the partial alveolus is for the canine, probably a single-rooted one, as in *K. cuii,* so that *K. gobiense* should have eight postcanines (4p-4m).

The eupantotherian *Arguinus* *khosbajari* was originally interpreted as having eight postcanines (5p-3m) in the holotype (PSS no. 10-15; Dashzeveg, 1994). The tooth identified as p5 was later considered as m1 because it was deeply worn compared to other teeth (Butler and Clemens, 2001; Kielan-Jaworowska et al., 2004). Lopatin and Averianov (2006b) further endorsed that the tooth originally identified as “p5” in the holotype was “m1”, which was agreed by others (Davis and Cifelli, 2011). However, Lopatin and Averianov (2006b) proposed that the lower postcanine dental formula of *Arguinu* is 5p-4m and that this dental formula was intermediate between *Nanolestes* (5p-5m) and *Peramus* (5p-3m). Lopatin and Averianov (2006b) were apparently influenced by McKenna’s view that five premolars were primitive for zatherians. Based on the cast of the holotype specimen (Extended Data Fig. 4E-H), if the tooth originally identified as “p5” is actually “m1”, then the holotype mandible of *Arguimus khosbajar* can only have four premolars. While Kielan-Jaworowska et al. (2004: p297) thought that *Arguimus* has “four double-rooted premolars”, our imaging clearly shows a small and single-rooted p1, consistent with the original observation (Dashzeveg, 1994), although a single-rooted p1 is uncommon in “eupantotheriuans” (Martin, 2002). Based on the holotype specimen and the four molar interpretation above, *Arguimus* has eight postcanines, as originally interpreted (Dashzeveg, 1994) and a 4p-4m dental formula, as noted by others (Butler and Clemens, 2001; Kielan- Jaworowska et al., 2004; this study). In general, there is no direct fossil evidence of nine postcanines in any early zatherians (Wang et al., 2025; Hunter, 2026).

**IV. Tooth reduction (Fig. 4)**

One of the characters marking the transformation of the dental formula from basal tribosphenic mammals to placentals and marsupials is premolar reduction, such as that the postcanines change from eight to seven, a subject that has been discussed in many studies (Simpson, 1936; Ziegler, 1971; Fox, 1975; McKenna, 1975; Bown and Kraus, 1979; Slaughter, 1981; Novacek, 1986; Luckett, 1993; Averianov et al., 2010). The current view is that the third premolar locus was lost during the transition in therians (Wible et al., 2009; Archibald and Averianov, 2012; O’Leary et al., 2013; Averianov and Archibald, 2015).

It has been pointed out that the fourth (penultimate) upper postcanines of *Peramus* is enlarged and trenchant; it is homologous with the penultimate upper premolar of *Kennalestes* and *Zalambdalestes* and with p3 of early marsupials (Luckett, 1993). The condition also characterizes the penultimate upper premolar of *Asioryctes* and *Prokennalestes*, as well as the p3 of deltatheridiids (Kiclan-Jaworowska et al., 1979; Dashzeveg and Kielan-Jaworowska, 1984; Kielan-Jaworowska and Dashzeveg, 1989). This trenchant tooth in each case is located at the fifth position from the posterior end of the postcanine dentition (Butler and Clemens, 2001). Luckett (1993) also noted that in *Peramus* and all Cretaceous tribosphenidans for which the postcanine dentition is known, the trenchant premolar is followed by four cheek teeth primitively, regardless of the molariform or submolariform nature of these teeth. The four distal teeth are all lower than the trenchant premolar or the latter has the tallest cusp in the dentition, forming a distinct marker. Thus, Luckett postulated that the posterior five cheek tooth positions in all these mammals are serially homologous. A similar conclusion was reached and illustrated by Averianov et al. (2010, fig. 9). In contrast, the tooth at the third locus is commonly smaller than teeth mesial and distal to it or even lost **(**Lillegraven, 1969; Clemens, 1973; Kielan-Jaworowska 1981; Kielan-Jaworowska and Dashzeveg, 1989; Sigogneau-Russell et al., 1992; Averianov and Archibald, 2015), which supports the view that P3/p3 were lost during the evolution of therians (O’Leary et al., 2013). This configuration is present in more recently known Cretaceous eutherians, such as *Maelestes* (Wible et al., 2007, 2009) and *Sasayamamylos* (Kusuhashi et al., 2013) as well as Jehol eutherians, including *Ambolestes* (Bi et al., 2018), *Cokotherium* (Wang *et al.*, 2022), *Microtherulum* (Wang and Wang, 2023), and *Acrestatherium* (Hu et al., 2010). It also occurs in the purported Jurassic eutherian *Juramaia* (Luo et al., 2011). Here, *Jeholotherium* adds additional evidence for this dental pattern. Although the trend in the upper dentition appears compelling, the lower dentition is less certain because in these Jehol eutherians, the lower premolars show a gradient from the largest p5 to the smallest p1. An exception is the upper dentition of *Eomaia* (Ji et al., 2002) in which P4 is the smallest upper premolar, whereas P5 is trenchant and the tallest tooth. However, Averianov et al. (2010) provided an alternative interpretation, accepted by Bi et al. (2018) that reconciles the *Eomaia* tooth formula with the typical basal eutherian condition.

The purported metatherian, Sinodelphys (Luo et al., 2003; but see Bi et al., 2018 who interpreted it as a eutherian) has eight upper postcanines but only seven lower ones. Because there is a diastema between the first and second existing premolars, it was proposed that its p2 was possibly lost (Averianov et al., 2010), although p3 was interpreted as lost by Bi et al. (2018).

Various conditions of premolar size exist in the dentitions of therians (Averianov and Archibald, 2015), but it seems that reduction of P3/p3 in eutherians is best supported by the available evidence. While Luckett (1993) pointed out that loss in the middle of the premolars would represent a great departure from the pattern of tooth reduction or loss that characterizes most known extant and fossil eutherians because premolars appear to have been lost in an anterior-posterior sequence (Kindahl, 1967; Ziegler, 1971; Fox, 1983). On the other hand, Butler and Clemens (2001) postulated that reduction of the premolar series in the middle reflects functional differentiation between anterior holding teeth and posterior puncturing teeth.

Fossils of basal metatherians are relatively fewer than eutherians, possibly reflecting their relative lower diversity compared to eutherians, as that of extant marsupials to placentals (Burgin et al., 2018, 2025). For those taxa in which the dentition is known, they have three premolars and four molars, such as *Kokopellia* (Cifelli, 1993) and deltatheroidans (Rougier et al., 1998). There seems no comparable evidence for reduction of a premolar in the middle position of the tooth series in metatherians, although such a reduction has been so assumed (O’Leary et al., 2013). Alternatively, loss of P1/p1 is plausible in metatherians (Averianov et al., 2010). We adopt this interpretation in our study because it is consistent with the trend of mesial size reduction in K. cuii (Fig. 1, Extended Data Figs. 1-4). Averianov et al. (2010) considered the metatherian dental formula as derived in the transformation of therian tooth formulas. However, given our hypothesis that the 4P-4M/4p-4m is primitive for tribosphenidans and therians, the metatherian and eutherian tooth formula and developmental patterns could be better interpreted as independently derived from the ancestral condition and specizlized in different directions.

**V. Systematic Paleontology**

Mammalia Linnaeus, 1758

Zatheria, McKenna, 1975

Tribosphenida McKenna, 1975

*Kielantherium* Dashzeveg, 1975

**Type species:** *Kielantherium gobiense* (*gobiensis*) Dashzeveg, 1975 (see Lopatin and Averianov 2007 for the name change) from the Lower Early Cretaceous (Aptian or Albian), Höövör Beds, Mongolia.

**Included species:** *Kielantherium cuii*. sp. nov.

**Emended differential diagnosis:** *Kielantherium* is unique among cynodonts in having the combination of the following characters: There are eight upper and lower postcanines, respectively, with the formula 4P-4M/4p-4m (or 4P/1p-1dP5/1p5-3M/3m, see Terminology in Methods). P4 has no protoconal swelling but has a small lingual root in addition to the labial two roots. The metacone is distal to the paracone and the two cusps are close to each other, connected by a short centrocrista. The merged base of the paracone and metacone is robust and lingually positioned, as in *Peramus*, which provides strong wear surfaces against the lower molar. An incipient protocone is developed on the lingual cingulum of the upper molars. Wear facet 6 is present on the primary mesial cingulum (the preprotocrista), created by contact with the distal metacristid. Wear facet 6 is present on the distal side of the protocone, created by contact with the entocristid and probably with the following tooth. The parastylar groove and the preparastyle are distinct. The trigonid of the lower molar is notably higher than the talonid and, relative to the protoconid, the paraconid stretches mesiolingually, whereas the metaconid extends transversely. The talonid has a strong distal metacristid (=*cristid obliqua* of Dashzeveg and Kielan-Jaworowska, 1984) connecting the metoconid and the hypoconid. The hypoconid and hypoconulid well-separated but connected by a relatively long hypocristid so that the talonid angle (Davis, 2011a)is pronounced and the talonid could provide substantial wear surfaces against the paracone and metacone of the upper molar. The talonid lacks the entoconid and the basin is small and opens lingually. The hypoconulid is embraced by cusps e and f of the following molar to form an interlocking relationship between molars, of which cusp f bears a partial wear facet 4 of the mesial tooth. The dentary has a gently curved lower margin and a foramen at the anterior corner of the masseteric fossa. The angular process is distinct and slightly inflected medially.

**Remarks:** *Kielantherium* has been placed in Aegialodontidae (Kermack, 1967) and Aegialodontia (Butler, 1977, 1978) in a complex taxonomic treatment that were related to “Tribotherians” (see Kielan-Jaworowska et al., 2004 for a review). Cretaceous taxa lumped in the tribotherian assemblage are mostly represented by isolated teeth, making identification of their affinity difficult. Nonetheless, *Aegialodon* (Kermack et al., 1965) and *Kielantherium* (Dashzeveg, 1975) are the two taxa that have been consistently placed in Aegialodontia (Butler, 1977, 1990; Kielan-Jaworowska et al., 2004). However, *Aegialodon* is represented by only a single lower molar and its morphology, such as how many cusps exist in its talonid, remains debatable (Kermack et al., 1965; Marshall and Kielan-Jaworowska, 1992). The limited and uncertain morphological features are insufficient to prove whether the two genera form a natural group (Wang et al., 2025). Thus, we did not include *Aegialodon* in our analysis, and taxonomically we place *Kielantherium* directly under Tribosphenida.

***Kielantherium cuii* sp. nov.**

**Holotype and Diagnosis:** See the main text.

**Locality and age:** Lamadong site, Jiufotang Formation (Barremian,124–121 Ma), Jianchang County, Liaoning Province, China. Fossil assemblage from the Jiufotang Formation was considered as representing the late phase of the Jehol Biota (Zhong et al., 2025) but other recent study may extend the biota to Aptian (118 Ma, Ying et al., 2025). Multiple studies dating the Jiufotang Formation have been conducted, notably including the following: The tuffs in Jiufotang Formation at the Shangheshou section were dated as 120.3±0.7 million years ago (He et al., 2004) and the tuff from the lowermost part of the Jiufotang Formation at the Pijiagou section was dated 122.1±0.3 Ma (Chang et al., 2009). Similar dating was reached by other studies (Yu et al., 2021, 2023). Yang et al. (2020) endorsed that the late phase of the Jehol Biota present in the Jiufotang Formation in western Liaoning can be confidently dated at about 120 Ma. Whether the date 110.59±0.52Ma (Eberth et al., 1993) can be used as the upper limit for the Jiufotang Formation remains uncertain because of the difficulty of the stratigraphic correlation between these sites. When mammal fossils from the Jiufotang Formation were considered, the age was usually cited as Aptian or 120 Ma (Meng et al., 2011; Han and Meng, 2016; Mao et al., 2020b, 2021).

**Remarks:** Our findings support the association of the upper molar PIN 3101/110 (Lopatin and Averianov, 2006a, 2007) with the lower teeth of *Kielantherium gobiense* from the same locality (Dashzeveg, 1975; Dashzeveg and Kielan-Jaworowska, 1984). Originally identified as an M2, PIN 3101/110 may alternatively be interpreted as an M1 because of its similarity to M1 of *K. cuii*. The previous observation that facets 3 and 4 on the lower molar of *K. gobiense* were not substantially larger than those of *Peramus* (Davis, 2012) was likely owing to the relatively early ontogenetic stage of the known *K. gobiense* specimens. *K. gobiense* is similar to *K. cuii* in having a labially projected hypoconid, which would fit into the groove between the paracone and metacone of the upper molar, thereby creating wear facet 3 and 4 on both upper and lower molars. In constrast, the holotype of *K. gobiense* appears to represent a relatively young individual, compared to that of *K. cuii*, so that the wear facets were not yet formed.

In trechnotherians, the first molar erupts before replacement of the ultimate premolar so that the latter cannot be more worn than m1 (Kielan−Jaworowska et al. 2004). In addition to its molariform morphology, the deep wear of the fifth tooth, compared to p4, of *K. cui* is a strong evidence to identify it as dp5 (traditionally m1), belonging to the same tooth generation as the other molars.

**Description (Fig. 1; Extended Data Figs. 1-5)**

The holotype **(**ZGY0054**)** is a partial and disarticulated skeleton with cranial fragments,both lower jaws, and some postcranial remains. Bones are in peach black and appears carbonized but the tooth morphologies are well preserved. The identifiable cranial fragments include both left and right maxillae. The right maxilla was preserved in association with the right mandible in which the right P1, P4, M1 and M4 are preserved but partly broken; other right teeth have only the roots preserved. The left maxilla bears the canine, remains of the tooth crown, and roots of P4-M3. Left P1-3 had only tooth impressions preserved. A partial rostrum was preserved in association with the left maxilla. On the palatal side of the maxilla, lingual to the conjunction between two molars is pit, similar to that in symmetrodontans (Mao et al., 2020a), which was considered to accommodate the trigonid, the protoconid in particular, of the lower molar when the dentition was in rest position.

Both mandibles are preserved in good condition, the first nearly complete lower jaw of basal tribosphenidans. The left one is better preserved but displaced from the concentrated bone remains in preservation, whereas the right one is in the pile of bony elements; both with the lingual side exposed. The left mandible was prepared out from the matrix and teeth can be observed in all views; both mandibles have been CT-scanned and presented in Extended Data Fig. 3. The angular process is distinct with a blunt distal end and is slightly inflected medially in relation to the plane of the dentary body. The coronoid process is large, with its anterior edge positioned posterior to the ultimate lower molar. The mandibular condyle is above the level of the tooth row. The masseteric fossa is shallow but clearly defined by an anterior ridge that extends posterodorsally to delimit the anterior rim of the coronoid process. The masseteric foramen (or labial mandibular foramen) is at the anteroventral corner of the masseteric fossa. On the medial side of the mandible, the Meckelian is present but indistinct, partly due to compression of the jawbone in preservation. The groove runs in parallel to the ventral margin of the mandible. The posterior end of the Meckelian groove is ventral to the mandibular foramen and extends anteriorly to the level of m2. A scar indicates attachment of a small coronoid on each mandible; it is oval shaped with a pointed anterior end.

**Upper teeth (Fig. 1; Extended Data Fig. 2) -** Both right and left upper dentitions have damaged. The upper incisors are not preserved. The left upper dentition preserved most part of the canine, impressions of P1-3, roots in alveoli and crown remains of P4 to M4. The right upper dentition has P1, P4, M1, and M4 largely preserved, whereas other cheek teeth only have roots in alveoli. The right upper canine is complete but was displaced.

The upper canine is strong and double-rooted. The crown and roots are straight and the tooth is vertically implanted in the maxilla. There are a total of eight upper postcanine teeth, of which the mesial four are premolars and the distal four are molars based on their morphology (see Extended Data Table 1 for measurements). Based on the impressions and preserved remains, P1-3 are double-rooted, subequal in size, and similar in shape. P4 is much larger and more complex in crown structure than P1-3; it has three roots, two strong ones support the mesial and distal portion of the crown and a small one supports the lingually projected part of the crown, although the lingual side does not have the protocone or the protoconal swelling. In occlusal view the crown is transversely narrow, with the lingual part convex lingually. The main cusp was broken. The rhomboidal breakage and ridges associated to it indicates only one main cusp that is trenchant and bears the tallest cusp in the dentition, as in other early zatherians (McKenna, 1975; Luckett, 1993; Averianov et al., 2010).

Most upper molars are unfortunately broken. Judging from the roots in the alveoli and in correlation to the lower molars and wear patterns, there are four upper molars. As we defined in Terminology, of the four molars M1 may be interpreted as dP5 to assume homology of this tooth locus with stem eutherians and *Peramus* that have eight postcanines (see discussion in the main text). For convenience, however, we still use the conventional designation of M1-4 for the four molariform teeth in the following description. CT-scanning does not detect any tooth germ within the maxilla and mandible. Because the four lower molars bear extensive wear, it is unequivocal that the holotype of *K. cuii* represents an adult individual animal.

The right M1 is largely preserved, with the paracone and metacone broken. Its general morphologyis highly similar to the tooth identified as M2 of *Kielantherium gobiense* (PIN 3101/110, Lopatin and Averianov, 2006a, 2007). In this regard, our specimen supports the association of PIN 3101/110 with the lower teeth of *K. gobiense* (Lopatin and Averianov, 2006a, 2007) and suggests that PIN 3101/110 could also be interpreted as M1. M1 is tri-rooted with a lingual root being the thinnest and supporting the protoconal region. The tooth crown has a skewed triangular outline with the protocone apex positioned mesial to the transverse axis of the tooth. This triangular outline differs from p4 in being transversely wider than long due to the lingual extension of the crown. Unfortunately, the paracone and metacone were broken but the merged base of them is robust and indicates that the two cusps are closely packed, as in the upper molar of *K. gobiense* (PIN 3101/110). The remaining base shows a convex lingual surface whose lingual border levels with the lingual surface of P4. The anterior surface of the base is relatively flat and vertical. Similar to the upper molar of *K. gobiense* but differs from peramurids (Davis, 2012), the most conspicuous feature is an incipient protocone on the lingual cingulum, marking the lingual apex of the triangular crown. The protocone is very low, compared to the massive base of the paracone and metacone; it is transversely narrow and tapers anteriorly and posteriorly to the cingulum. A narrow groove, the incipient secondary trigon basin, separates the protocone from the strong wall of the merged base of the paracone and metacone. By position with the protocone, the cingulum posterior to the protocone should be homologous to the postprotocrista. It is incomplete due to breakage. From what preserved, this portion of the cingulum is narrow and gradually tapers labially, terminating distal to the conjunction between the metacone and cusp “C”. On the distolingual surface of the protocone there is a flat wear facet 6 (Crompton, 1971; Davis, 2011a), which is likely attritional (von Koenigswald et al., 2013) because it is planar and shows a clear marginal separation from the surrounding enamel. However, wear striations are not detected on the facet by SEM imaging due to application of glue on the specimens. Facet 6 was created by contact with the entocristid and perhaps with the distal tooth. The cingulum mesiolabial to the protocone is homologous to the preprotocrista; it is wide and continues labially to become confluent with the preparacrista. This configuration is different from *K. gobiense* (PIN 3101/110) where the cingulum mesial to the protocone is narrow. Lopatin and Averianov (2007) thought that the labially extended preprotocrista (mesial cingulum) and the preparacrista provide for double-rank prevallum/postvallid shearing, a distinctive synapomorphic feature of Tribosphenida (Fox, 1975; Luo et al., 2002; Kielan−Jaworowska et al., 2004). Given the lower ridge of the preprotocrista (mesial cingulum), it is uncertain in our view that the double-rank prevallum/postvallid shearing already existed in *Kielantherium*. However, wear facet 5 was identified on the narrow cingulum (preprotocrista) of PIN 3101/110. In *K. cuii*, the corresponding region is broad and bears facet 5, which is most likely formed by contact against the distal metacristid; this contact forms a stop mechanism to prevent any deep and overly shearing occlusion (see discussion in the main text). The preparacrista terminates at the mesiolabial corner of the crown as the parastyle. Its proximal end appears complete (not broken from the paracone), suggesting that it is separated from the paracone by a narrow notch; distally, the preparacrista does not connect the parastyle but is separated from the latter by a narrow groove that continues lingually as the parastylar groove (Lopatin and Averianov, 2006a, 2007).

The parastylar wing is well-developed and bears the parastyle and stylocone. The parastyle occupies the mesiolabial corner of the tooth crown. A short ridge from the parastyle is directed toward the preparacrista and a long ridge, which forms the mesial mesiolabial border of the tooth crown, extends lingually to the preparastyle (Lopatin and Averianov, 2006a, 2007). The parastylar groove is well developed along the preparastyle. The stylocone is smaller than the parastyle and is mesiodistally extended. The ectoflexus is shallowly curved and bears no cuspule. The postmetacrista extends distolabially and bears a distinct cusp (cusp “c” in Crompton 1971, emended as “C” in Kielan-Jaworowska et al. 2004; Lopatin and Averianov, 2006a, 2007). The metastyle, if any, is very weak. The protocone is small, transversely narrow, and much lower than the paracone and metacone. Although smaller than cusp “C” or the parastyle, it is a distinct cusp. It aligns labially with the mesial surface of the paracone base. The preprotocrista is well-developed, considerably stronger than that of *Kielantherium*, and forms a shelf-like structure that continues labially to merge with the preparastyle. This labially extended preprotocrista and the preparacrista provide for double-rank prevallum/postvallid shearing, a distinctive synapomorphic feature of Tribosphenida (Fox 1975; Luo et al. 2002; Kielan-Jaworowska et al. 2004; Lopatin and Averianov, 2007). The protocone sends a short postprotocrista distally that ends lingual to the base of the metacone. Wear facets 1 and 2 are distinct on the preparastyle area and distal to the postmetacrista. The tooth crown is supported by three roots, a lingual one and two labial ones. The root remains indicate that the molars decrease size distally.

The right M2 crown was broken and only the parastyle is preserved. Judging from the positions of its roots and remains of the crown, this tooth should be roughly similar to M1 in size. The extoflexus on M2 and M3 is slightly deeper than that of M1. The left M1 and M2 have the external portion poorly preserved, but they are consistent with what is shown in the right M1, such as a narrow external shelf and presence of the buccal cuspule on M1. M2 shows a deeper extoflexus than in M1. The parastyle of M3 is similar to M2 but the metastyle reduced so that the distal half of the tooth crown is narrower the anterior one.

The right M4 is preserved but displaced from its alveolus. Its crown is partly damaged. The protocone is intact. As in M1, it is a low cusp on the lingual cingulum. This configuration is in sharp contrast to that of *Jeholotherium* (Extended Data Fig. 8). Unlike M1, the cingulum extends to the distal side of the crown and decreases the height and width buccally. The remain part of the mesial cingulum is wide, similar to that of M1. The middle part of the tooth crown was broken; this area is where the paracone and/or metacone are positioned. In addition to being transversely narrower than other upper molars, M4 is anterodistally short. Thus, if both the paracone and metacone are present, they must be closely compresses or merged. The broken area for the paracone/metacone tapers lingually to form a ridge toward the protocone and ends at the concave area labial to the protocone. On the labial side of the crown, the parastyle is a distinct cusp at the mesiobuccal corner of the crown, much higher than the protocone. The distolabial corner, where the metastyle supposes to be, is reduced and very low in position. As shown by the right M4 and the preserved remain of the left M4, this tooth is transversely narrower and mesiodistally shorter than other molars. M4 is highly different from the ultimate upper molar of therians in which the tooth crown is shortened and the posterior half of the tooth (the metacone and metastyle) is reduced while the parastyle is usually similar to the penultimate molar.

**Lower dentition (Fig. 1; Extended Data Fig. 3) -** The left mandible preserves the second incisor. Other incisors and canines from both mandibles were displaced. Of the nine displaced teeth, seven small ones have to be the incisors. Thus, there are eight incisors in the two lower jaws, which is consistent with the four alveoli for incisors in each mandible revealed by the CT-scan images (Extended Data Fig. 4I-N). Thus, *Kielantherium cuii* has four pairs of lower incisors, and based on it we infer there are five upper incisors, which is the primitive condition of therians. Except for the tooth denoted as “5” in Extended Data Fig. 3, which appears to be in mirror shape of the left i2, it is difficult to ascertain the loci of these incisors. In general, these teeth are single-rooted with simple crown. The i2 is convex anteriorly and concave distally.

The two bigger displaced teeth (8 and 9 in fig. 4) are unquestionably the lower canines; their sizes match the canine alveoli in the mandibles. The lower canine is single-rooted with a blunt conical cusp; it is much stronger than the incisors and mesial premolars. Judging from the alveoli and sizes of the displaced teeth, there should be no notable diastema from i1 to p1. A total of eight postcanine teeth are present in each mandible. There is no diastema between any adjacent postcanine teeth. All lower postcanine teeth are double-rooted with the distal one stronger than, or subequal to, the mesial one.

The p1 is the smallest postcanine tooth and the size of premolars increase distally. The p1 and p2 are similar in morphology; both have a main cusp and a small distal heel in labial view. The p2 is larger than p1 and, in occlusal view, has its distal half transversely wider than the mesial half (see Extended Data Table. 1 for measurements). The p3 is more widened and its base extends distally, ending with a low heel, and similar to p2, its distal half is wider than the mesial one. The p4 is sub-molariform with a well-developed trigonid consisting of a strong protoconid and small metaconid and paraconid. If preserved as isolated tooth, the p4 may well be identified as a molar with a single-cusped talonid. The metaconid is lingual to the protoconid and the paraconid extends mesiolingually. The distal metacristid (dm, Fox, 1975) extends from the metaconid and ends at the hypoconid positioned at the longitudinal axis of the tooth to form a heel or the talonid. The dm is mainly on the lingual side of the talonid and there is no talonid basin on the lingual side of the distal metacristid. However, on the labial side of the distal metacristid the hypoflexid is a broad and deep and extends ventrally on the talonid lobe that is lower than the base of the trigonid. The ultimate lower premolar (p4) has a well-developed trigonid with main cusps lower than those of the molars. It differs from the molar in lacking the hypoconulid and wear facet 4; the embrasure wear is consistent with configuration of P4 that has one main cusp; the latter occlude in the hypoflexid (the labial surface of the distal mtetacristid) between the trigonid and the hypoconid that is in contact distally with the mesial surface of m1. In contrast to the deeply worn m1, p4 shows little wear, indicating that it is a successive tooth. It is uncertain whether p1-3 are successive teeth, because these teeth usually do not show wear.

The m1 differs from p4 in being larger, with better developed trigonid and talonid that has the hypoconid and hypoconulid. At the mesial face of the trigonid, there are small cusps e (lingual) and f (labial) that form the embayment receiving the hypoconid of p4. The paraconid is subequal to the metaconid in size and sits at the mesiolingual end of the trigonid. The preprotocristid desends from the protoconid and extends mesiolingually toward the paraconid. The paracristid descends from the paraconid and extends toward the protoconid distolabially; the two cristids align inline but do not merge as one continuous ridge; instead, they are separated by a narrow notch, the paracristid notch, at the lowest point where the two cristids meet; this point is at one third of the crest length, closer to the paraconid. This notched crest bears wear facet 2 (Crompton, 1971) that was in contact with the distal surfaces of the metacone and the postmetacrista bearing cusp “C” of the upper molar. Because this notched crest (the paracristid) is orientated diagonally, it indicates that the wear facet formed by the metacone and postmetacrista should be in the same orientation. Also because of the mesiolingually extended paraconid, the relative size of the trigonid angle (Fox, 1975) is large and the trigonid is lingually wide open. These structures emphasize the postvallum-prevallid shearing occlusion (Fox, 1975). The metaconid is lingual to the protoconid and the distance between the two cusps is the shortest among the three trigonid cusps. Both the postprotocristid and premetacristid are short; they are also separated by a narrow notch where the crests are at the lowest point; the two cristids form a ridge that is transversely straight.

Distal to the protoconid on the labial side, the wall of the trigonid is vertical and deep, which bears the wear facet 1 (Crompton, 1971). On the lingual side of the trigonid, however, the distal metacristid derives from the tip of the metaconid, descends toward the talonid, and curves labially to join the hypoconid; it becomes thicker from the tip of the metacone to the hypoconid. Between the metaconid and the hypoconid the hypoflexid is deep and extends ventrally to the base of the talonid. A small concave area, the rudimentary talonid basin, is present on the lingual side of the distal metacristid and the hypoconulid is developed at the distal end of the talonid. The hypoconulid is separated mesially from the hypoconid by a groove and distally lodged in the embayment hold by cusps e and f on the mesial face of m2 to form an interlocking relationship between the two teeth. Because of the distinct hypoconulid and relatively long hypocristid, the talonid angle (Davis, 2011a) is distinct and the hypoconid is no longer in contact with the succeeding tooth. Instead, the talonid angle (Davis, 2011a) projects labially and bears two wear facets: one on its mesiolabial face (facet 3) and the other (facet 4) on the distolabial face, indicating contact with an embrasure between the paracone and metacone of M1.

The lower molars are deeply worn at the talonid region so that some enamel prism and dentin structures are exposed at the wear facets (Extended Data Fig. 5), a condition that is not commonly preserved in fossils. It, however, provides useful information about the tooth generation and wear. The m1 appears to be the deepest worn molar, while the premolars, particularly p4, appear little worn. This implies that m1 is a deciduous tooth rather than a successional one, supporting our interpretation that the fifth tooth locus is dp5. This also lends support to the interpretation of the fifth upper postcanine as dP5. The talonid is so worn that the tip of the hypoconid becomes a sharpened point defined by the attritional facets 3 and 4, which are created by contact with the strong and lingually positioned paracone and metacone that are close to each other. These wears and resulted cusp shape indicate that the hypoconid of *Kielantherium cuii* functioned primarily for shearing; it did not yet form the second opposition of the tribosphenic molar (Simpson, 1936). The degree of wear not only be seen from the worn talonid of m1, but also from the wear of cusp f on m2, which forms a distal portion of facet 4 that is primarily on the distolabial side of the m1 talonid. On the lingual side of the distal metacristid the concave area is homologous to the talonid basin, but it is small, shallow, and open lingually. There seems no notable wear in the basin.

The m2-4 are generally similar to m1 in size and shape; they slightly decrease size (height and width) distally, but the size reduction of m4 is not so distinct as that of *K. gobiense.* The talonid of m4 is longest of the four molars.

**Metatheria Huxley, 1880**

***Liaodelta angusta* gen. et sp. nov.**

**Holotype:** IVPP V34585; see main text.

**Remarks:** As indicated by the diagnosis, the **presence of** four molars and well-developed sectorial postmetacrista, emphasizing postvallum-prevallid shear, supports the affinity of *Liaodelta* with Deltatheroida (Kielan-Jaworowska, 1982). However, several features, including its relatively small protocone, absence of conules, the greatly reduced protocone on M4, suggest that *Liaodelta* is more plesiomorphic than taxa currently recognized as deltatheroidans or stem metatherians, such as those from the Early Cretaceous Trinity Formation of North America (Patterson, 1956; Slaughter, 1981; Turnbull, 1971; Kielan-Jaworowska and Cifelli, 2001; Wilson and Riedel, 2010; Davis and Cifelli, 2011; Oreska et al., 2013; Averianov, 2015; Cifelli and Davis, 2015). Interestingly, the upper molar resembles the hypothetical upper molar of *Aegialodon* (Crompton, 1971). Its relatively small protocone, compared to other therians, may correspond to the narrow talonid observed in either *Aegialodon* (Kermack et al., 1965) or *Tribactonodon* (Sigogneau-Russell et al., 2001). Overall, its upper molar morphology appears intermediate between that of *Kielantherium* and more derived therians. Although we assign *Liaodelta* to Theria, it is possible that it represents a species of Aegialodontia (Butler, 1978) or alternatively a stem therian within Tribosphenida, occupying a position between *Kielantherium* and Theria.

**Description (Fig. 2; Extended Data Fig.** **6)**

**Cranium -** The partial cranium has been badly crushed in preservation so that the bones in the cranial roof are pushed down against the bones in the palate and sidewalls of the braincase. Most of the cranial elements are also fractured into small pieces, making identification of cranial bone elements difficult. A few elements are still discernable. The jugal is sizable and posteriorly extends to the anterior rim of the glenoid fossa. The glenoid fossa of the squamosal is fully developed, with an oval-shape articular area and a transversely orientated postglenoid process. A sickle-shaped ectotympanic is present. Compared to other Jehol mammals, it certainly differs from that of the triconodontans, such as *Liaoconodon* (Meng et al., 2011), and the symmetrodontan *Origolestes* (Mao et al., 2020a); it is similar to that of the multituberculate *Sinobaatar pani* (Mao et al., 2020b). Additionally, it is less expanded than that of *Ambolestes zhoui* (Bi et al., 2018) and *Microtherulum oneirodes* (Wang and Wang, 2023). The petrosal, particularly the promontorium, on each side of the cranium is well-preserved. While the boundary of the bone is not accurately recognizable due to the preservation condition, the promontorium is certainly well-formed in an almond shape with convex ventral surface. On the palatal process of the maxilla, pits receiving the trigonids of the lower molars are present between the protocones of adjacent molars, as in *Kielantherium cuii*, which indicates that the protoconid of the lower molar is tall.

**Dentition -** Only some upper postcanines are preserved, including the partial left ultimate premolar and all molars from both upper dentitions except for the right ultimate molar (Fig. 2). While we recognize the tooth homology in therians (Methods), we will refer the upper molars as M1-4 for the four molariform teeth. The ultimate premolar will be referred to as P4, as we discussed the homology of this tooth in the text. P4 has it main cusp broken. From the shape and size of the broken base, it can reasonably infer that the tooth has a main cusp that is the tallest, as in other zatherians, such as *Sulestes* (Averianov et al., 2010). The main cusp sends a crest downward to a. small distal cusp that slightly tilts labially. There is no lingual or labial cingulum and the tooth crown is markedly narrower than the molars. The tooth is double-rooted and does not have the protoconal swelling. The tooth is not fully erupted, which indicates that it is a successional tooth instead of a deciduous one. Similarly, M4 is not fully erupted; thus, the specimen may represent a young individual. CT-scan does not reveal any tooth germ in the maxilla. These observations suggest that P4 is a successional tooth, as in marsupials, but the replacement condition in the mesial premolars remain unknown. M1-3 are similar in shape and triple-rooted, and lightly increase in size distally (Extended Data Table 1); thus, they will be collectively described as the upper molar. The upper molar crown is of triangular outline, more or less symmetrical, in occlusal view with the protocone at the lingual apex. The mesial edge is more transverse, whereas the distal edge is more oblique so that the protocone is more aligned with the paracone. The protocone is low, approximately 20% of the height of the paracone or metacone; it has flat labially and a convex lingually. The preprotocrista and postprotocrista, especially the former, are very weak and short. There is no conule. The trigon is small and mesiodistally short, about 20% of the maximum crown width. Within tribosphenidans, the protocone of *Liaodelta* appears to be the smallest except for *Kielantherium*. It suggests that the talonid basion is transversely narrow. The trigon is not basined; instead, there is a blunt ridge that extends from the protocone to the merged base of the paracone and metacone. The area distal this ridge is slightly concave and larger than the mesial area and this configuration is similar to that of *Jeholotherium*, in which it receives the hypoconid of the lower molar in occlusion. The preprotocrista continues labially as the anterior cingulum (paracingulum); it is narrow at the mesial base of the paracone and slightly flares toward the weak parastyle and the mesiolabial tip of the tooth crown. A very narrow parastylar groove is between the parastyple and the much stronger stylocone. The postprotocrista terminates at the base of the metacone so that there is no cingulum distal to the metacone. The paracone is larger, taller, and slightly more lingual than the metacone; both cusps have its convex lingual surface and relatively flat labial surface. The bases of the two cusps are merged but on the lingual side a shallow groove reveals the two bases of the two cusps. The centracrista is asymmetrically V-shaped in lingual or labial view, with the metacone side shorter. The mesiolabial edge of the paracone extends labially to a short and blunt preparacrista, which is separated from the paracone and the stylocone by narrow notch and takes a shape of a mesiodistally compressed cusp. The stylocone is a robust cusp that forms the main part of the metastyle. The distolabial edge of the metacone slopes toward the postmetacrista; however, it is separated by a distinct notch from the postmetacrista; the latter is longer and better developed than the preparacrista. The proximal portion of the postmetacrista inflates and projects as a cusp-like ridge, perhaps cusp “C” (cusp ‘c’ of Crompton 1971), that extends distolabially as a distinct crest. The metastylar lobe is broad and tongue-shaped with a rounded end; it is smoothly concave and bears no cusp. The ectoflexus is broad with the deepest point labial to the junction the paracone and metacone. In general, the external (stylar) shelf is broad and simple in M1-3. Because the specimen is likely from a young individual, there is no convincing evidence of tooth wear.M4 is reduced in size, but less so than in deltatheroidans (Rougier et al., 2004; Averianov et al., 2010). The parastylar shelf and paracone remain large, but the metacone is considerably reduced and the metastylar shelf is absent. Even more remarkable is that the protocone is reduced to a cuspule, similar to the protocone in *Kielantherian*, on the lingual cingulum.

**Eutheria Gill, 1872**

***Jeholotherium antiquum* gen. et sp. nov.**

**Holotype:** JZT-DB0062; see the main text.

**Locality and age:** Yixian Formation, Jianchang County. The chronology of the strata that yield the Jehol Biota has long been debated (Swisher et al., 1999; He et al., 2004; Chang et al., 2009, 2017). Some radiometric constraints suggest that the Yixian Formation spans ~7 million years, bounded by 129.7 ± 0.5 Ma (basalt at its base) and 122.1 ± 0.3 Ma (tuff at the base of the overlying Jiufotang Formation) (Chang et al., 2009). Additional dates include 126.5 Ma for the Jingangshan beds and 125.8 ± 1.0 Ma and 126.0 ± 0.8 Ma for basaltic samples from the Lujiatun beds (Chang et al., 2017). These data place the Yixian Formation between the early Barremian and early Aptian (~129.7–122 Ma) (Chang et al., 2009). The Jehol Biota may extend back to ~135 Ma based on the Huajiying Formation (Yang et al., 2020), with evolutionary stages corresponding to the Dabeigou (=Huajiying), Yixian, and Jiufotang assemblages. More recent studies continue the refinement. For instance, the Lujiatun beds are dated to 125.76–125.65 Ma (Zhong et al., 2021). The early Jehol stage may reach ~132 Ma (Yu et al., 2022), while the Jiufotang Formation likely begins around 124 Ma and may extend into the Aptian (~118 Ma) (Zhong et al., 2025; Ying et al., 2025). U–Pb zircon ages (124.3 ± 1.5 Ma, 124.9 ± 1.6 Ma, 121.5 ± 1.4 Ma) further suggest that the Jiufengshan Formation correlates with the upper Yixian and lower Jiufotang (Li et al., 2023). Based on these studies, it appears that fossils from the Yixian Formation represent the early stage of the Jehol Biota and that their age may range from 132 to 124 Ma (Hauterivian-Barremian).

**Remarks:** The known Jehol eutherians, such as *Eomaia scansorial, Microtherulum oneirodes,* and *Cokotherium jiufotangensis*, and the purported Jurassic *Juramaia sinensis* are mainly differentiated by their dental features (Wang et al., 2022; Wang and Wang, 2023). The dental differences among these species are not so distinct. As noted in other studies (Meng, 2014; Bi et al., 2018; King and Beck, 2020), this again raises the issue that the Jehol eutherians show morphological similarities to the Jurassic *Juramaia*, which is 35 million years older (Luo et al., 2011). The taxonomy of these Jehol eutherians has also been hampered by the fact that some holotype specimens, such as those of *Eomaia*, *Sinodelphys*, and *Acristatherium*, are observable only from the labial and/or lingual side of the dentitions because the upper and lower teeth are in occlusion so that the tooth morphology in the occlusal view is not available, although it is critical for species identification of Mesozoic mammals. The holotype of *Juramaia* shows the crown view of the upper dentition, but not of the lower teeth.

**Description (Fig. 3; Extended Data Figs. 7, 8)**

The holotype of *Jeholotherium antiquum* (JZT-DB0062) is a crushed skeleton with near entirety preserved but in a poor condition in a slab. There should be a counterpart of the slab that contains some of the bony element, but it was probably broken when the specimen was discovered. Nonetheless, the slab available contains most of the bones of the skeleton. The postcranium was crushed dorsoventrally, whereas the skull was compressed sideway with the right side being embedded in the matrix, thus better preserved, while the exposed left side was badly damaged. Nonetheless, skeletal morphologies and dentitions are still of rich data and provide us another opportunity to understand the earliest evolution of therians with well-developed tribosphenic teeth and associated skeletal features.

**Mandible -** Both mandibles are preserved in partial, with the right one in a better condition. The lateral side of the right mandible and lingual side of the left one are preserved in the matrix when the specimen was split open so that bone surfaces are smooth although fractured. The coronoid process of the mandible is incomplete but its outline is discernable. The process is not high and has an inclined anterior edge that makes a 120° with the tooth horizontal plane of the mandible. This angle is larger than that in most therian species from the Jehol Biota, such as *Eomaia*, where the mandible is preserved. The anterior edge and the lateral ridge confine a triangular masseteric fossa and at its ventral rim of the anterior apex the masseteric foramen is present, as in *Kielantherium gogiense* (Dashzeveg and Kielan-Jaworowska, 1984), *Arguimus* (Lopatin and Averianov, 2006b), and *Peramus* (Davis, 2012). The lateral ridge leads posterodorsally to the condyle that is dorsoventral lower in lateral view. The angular process is slim, pointing posteroventrally. The horizontal ramus of the mandible is lower and slender; with the ventral edge gently convex ventrally and the deepest region is below m2. Two posterior mental foramina are close to each other; the posterior one is below the anterior root of m1 and the other is below p5. There is possibly an anterior mantal foramen at the level of the diastema between the canine and p1, but due to the fracture it is uncertain. Whether there is another mental foramen at the area below m2 and m3 is uncertain because the right premaxilla is stuck to that area, blocking the view of the mandibular surface. The medial side of the mandible is poorly preserved. A vestigial Meckel’s groove is probably present. There is no sign of the ossified Meckel’s cartilage. Anteriorly the symphysis is spindle-shaped with a rugose surface and not fused; it is horizontally positioned and dorsally bunded by a ridge. On the broken sides of the mandible, the mandibular canal is exposed. Its diameter (thickness) is as broad as the posterior root of m1 and remains quite even throughout or only slightly narrows anteriorly. The two mental foramina open at the dorsal rim of the mandibular canal and are confluent with the canal.

**Lower Dentition** - The tooth formula is 5I-1C-5P-3M/4i-1c-5p-3m (see Terminology in Methods). Our description starts from the lower teeth because the right lower dentition is largely preserved in situ so that it can provides a reference for reconstructing the tooth positions of the partly displaced upper teeth. All teeth have fully erupted and there is no tooth germ in the jawbones, indicating an adult individual. Because of the preservation, most of the left teeth are missing but the right dentition is relatively complete. In the preserved right teeth, the lingual sides of m2 and m3 are damaged.

The lower incisor crown is single-rooted and low crown with a leaf-like shape in that there is a lingual and labial projection from the main cusp so that the crown is bluntly tri-pronged. The labial surface is convex in either vertical or horizontal axis, with a shallow concavity between the main cusp and either the lingual or labial lobe. The lingual side of the crown is more complicated. The main cusp has a convex lingual side that continues ventrally to the root, whereas either the lingual or the labial projection has a concave lingual surface.

The lower canine is doubled-rooted with the posterior one thicker and the anterior one slightly curved. Unlike other therians from the Jehol Biota, the lower canine crown is premolariform and only slightly higher than p1; it is transversely compressed. The canine is inclined anteriorly, and in lateral (or medial) view, the anterior surface of the tooth crown is convex and the posterior one is straight or slightly concave. In anterior view, the labial surface of the crown is convex, whereas the lingual one is flat.

The p1is separated from the canine by a tooth long diastema, the largest gap between adjacent teeth in the dentition. The p1-3 are similar in shape, with tooth size slightly increased posteriorly; each has two roots, with the posterior one thicker and more inclined than the anterior one. A narrow gap is between each pair. In lateral (or medial) view, the tooth crown is lower than that of the canine and is asymmetrically triangular in shape; the main cusps, presumably cusp a or the protoconid, is medially positioned and its posterior edge is more posteriorly extended from p1 to p3. There is a small cuspule at the distal base of the main cusp, which slightly increases the size from p1 to p3. There is not cingulid. The p4 is separated from p3 by a slightly larger diastema. The p4 differs from anterior premolars in having a distinct mesial cuspule at the anterior base of the main cusp, which is smaller than the posterior cuspule. We identify them as cusp b and c, respectively, or the paraconid and the metaconid, as we advocated following other works (Mao et al., 2024a and references therein). The main cusp is triangular in lateral view, with a convex anterior edge and slightly concave posterior edge. The labial surface is convex and the lingual one is slightly concave; in anterior or posterior view, the tooth apex appear slightly curving lingually. There is no labial cingulid, and there seems no lingual cingulid either but due to fracture this is not certain. From p4 to m3, the teeth are tightly packed. The p5 is larger (taller and longer) than p4; cusps a, b, and c of p5 are larger than the corresponding ones of p4. The general morphology of p5 is similar to p4, clearly premolariform so that the morphological difference between p5 and m1 is abrupt.

The m1 is preserved in the best condition, whereas the lingual portions of m2 and m3 were damaged, but the preserved tooth crowns show that m1-3 are similar in shape and size. The lower molar morphology described below is mainly based on m1. The molar is double-rooted, with the posterior one being thicker and circular in cross section and the anterior one slightly compressed anteroposteriorly. The trigonid is much higher than the talonid with the protoconid, albeit fractured, being the tallest and strongest cusp. The lingual side of the protoconid is a flat, vertical surface, whereas the anterior, labial, and posterior sides form a convex or rounded surface in cross-section. In mesial or distal view, the protoconid has a broadly curved outline with the cusp tip tilting lingually. The paraconid is conical and the lowest of the three trigonid cusps; it projects slightly anterodorsally. The paracristid is short and blunt; at its labial end it is separated from the protoconid base by a narrow notch. The metaconid was smashed toward the protoconid; its shape is unclear but it remains showing that it is stronger and taller than the paraconid. The trigonid basin is narrow and opens lingually; the bases of the paraconid and the metaconid are well separated. Along the mesial base of the trigonid, there are two cingulid cusps, the mesiolingual cuspule e and the mesiolabial cuspule f. Cuspule f is small and positioned low at the base of the tooth crown, whereas cuspule e is much higher and extends dorsally as a ridge that merges to the anterior surface of the paraconid. A shallow notch is confined by cuspules e and f, which may have received the distal end of cusp c of p5. The distal metacristid (Fox, 1975) is blunt and descends lateroventrally from the distal side of the metaconid and posteriorly joins the hypoconid. On the distal metacristid a small but distinct mesoconid is present; it is separated from the hypoconid by a very small notch. Labially, a broad hypoflexid (extoflexid, Williamson et al., 2014) is between the protoconid and the hypoconid.

The talonid is narrower than the trigonid but distinct and long, consisting of three cusps: the hypoconid, the hypoconulid, and the entoconid. The hypoconulid is the smallest and the other two are subequal in size. The hypoconulid and entoconid are conical, whereas the hypoconid has a flat lingual surface and rounded labial surface. The three cusps are well separated from each other, but the hypoconulid is situated closer, nearly distal, to the hypoconid than to the entoconid. The inner sides of the three talonid cusps flare ventrally but do not confine a talonid basin. The talonid basin, the deepest concave area of the talonid, is anterior to the entoconid, lingual to the distal metacristid (the mesocoind). This basin is transversely narrow and largely open lingually, and its general morphology is similar to that of *Kermackia* from the Early Cretaceous Trinity Formation of North America (Patterson, 1956; Davis and Cifelli, 2011; Averianov, 2015). There is a low ridge, perhaps a combination of the preentocristid and postmetacristid (Williamson et al., 2014), bounds the basin. The tooth cusps and basin do not show wear facet in the CT-image.

**Upper dentition -** The left upper teeth are all gone but the right I5, the upper canine and postcanine teeth are preserved. These teeth have been out of their alveoli and displaced. However, with their relative position in preservation, tooth morphology, and in reference to the lower teeth preserved in situ, the upper dentition can be confidently reconstructed.

The upper left incisors were missing, but the alveoli in the premaxilla show that there are five teeth. A partial right premaxilla was displaced and stuck with the mandibles. Two upper incisors, presumably I2 and I3, are preserved, with I3 larger than I2. The incisor is single-rooted and the crown is spade like with convex labial surface and slightly concave lingual face. Unlike the lower incisors, it does not have the medial and lateral bulges.

The upper canine is strong, with a transversely narrow crown, with its broad crown base being supported by two strong roots of subequal thickness. In labial or lingual view, the outline of the crown is triangular with an arced mesial edge and a slightly concave distal edge. The apex of the crown shows the tendence of leaning posteriorly.

There are five upper premolars. P1 is separated from the canine by a diastema, corresponding to the one in the lower dentition. The size decreases from P1 to P3 where P3 is the smallest cheek tooth; this trend is opposite to that of p1-3. Because P1-3 are smaller than corresponding lower teeth, the diastema between them is larger than in the lower p1-3. There is no cingulum on P1-3. Each of P1-4 has two roots, of which the anterior one is slightly curved. In addition to other morphologies, this could be another indicator to orientate the premolar, had the tooth been found isolated. P1 and P2 generally similar in shape except the difference in size. In labial or lingual view, the tooth crown has a convex anterior outline and a slightly concave posterior one. In dorsal view, the anterior portion, where the main cusp exists, is thick and tapes distally. P3 as the smallest premolar has a more curved anterior root than P1-2. It also has a distal cuspule. This tooth is likely a deciduous tooth, and given its lowest position, it may not functional. The shape and size of P3 supports the hypothesis that it is the tooth that lost during the evolution of therian mammals (O’Leary et al., 2013).

P4 morphology is notably different from the mesial premolars. It is trenchant and has a predominant main cusp (cusp A) that is the tallest cusp in the upper dentition. This is a feature common in zatherians and critical for recognition of postcanine homology of therians (McKenna, 1975; Luckett, 1993; Averianov et al., 2010). The P4 main cusp is more convex on the labial side than the lingual side. There is a small cuspule at the anterior end of the crown, which we identified as cusp B. A cingulum derives from cusp B and extends around the anterolabial corner of the crown, but there is no cingulum on the lingual side. While the anterior surface of the main cusp is rounded, the posterior side is a sharp ridge that is labially positioned. At the lowest point of the ridge, a narrow gap separates it from the mesial base of the distolabial cusp (cusp C or metacone). A distal heel is present, which is labially bounded by cusp C and opens lingually. A small cuspule at the distal end of the heel is identified as cusp D. A shallow concavity is present lingual to cusp D. The P4 morphology appears unique among known stem eutherians.

P5 is submolariform and double-rooted, a plesiomorphic feature similar to *Acrestatherium* from the Jehol Biota (Wang et al., 2025). The proximal portion of its posterior root is transversely wide; its lingual end is below the lingual corner of the crown and extends posterolabially to below the metastyle. It is double the width of the anterior root. The tooth crown is partly damaged but its general morphology is discernable. In occlusal view, the outline of the P5 crown is triangular and is longer than its transverse width. On the lingual side, the lingual cingulum is partly preserved, forming the apex of the blunt triangular outline; there is no protoconal projection or protocone. The paracone is the largest and tallest cusp that is transversely compressed; its anterior and posterior sides are crest-like. The base of the anterior crest or the preparacrista continues mesiolabially to merge to a sizable cusp, the stylocone, at the mesiolabial corner. Distolingual to the stylocone is a small but distinct parastyle. By its position with the stylocone we interpret it as the parastyle instead of the preparastyle. The two cusps are separated by a shallow groove, and together they form a parastyle lobe, which appears unique for the species among therians. The metacone is present and distinct but much smaller than the paracone. It is transversely compressed and posterolabial to the paracone. The posterior crest of the paracone connects to the metacone to form the centracrista. The metacone extends still posterolabially to the metastyle that is conical and distinct.

M1 is also triangular but transversely extended due to the well-developed protocone, compared to *Kielantherium* and *Liaodelta*, and the expanded paracone and metacone, compared to those of P5. Three roots support the protocone, the paracone-parastyle, and the metacone-metastyle, respectively. The protocone is slim and sharply triangular in occlusal outline; it is much lower that the paracone. There is no distinct paraconule, but on the preprotocrista there is a bulge near the protocone, suggesting that the paraconule may be initiated. Labial to this bulge is a thin but continuous cingulum that extends labially to end at the initial, thus small, preparastyle. The postprotocrista is lower than the preprotocrista and the crista shows a swelling that suggests future metaconule, as in M2. Labial to the swelling the tooth crown is damaged. The paracone is the tallest cusp of the crown and is larger than the protocone. It has a strongly convex lingual surface and a flat or slightly concave labial side. The preparacrista is long, sharp, and curved, joining the stylocone labially. The stylocone is distinct but small. In addition to the preparacrista, it connects mesially the parastyle by a low ridge and extends distally as a low ridge that defines the labial edge of the anterior half of the tooth crown. There is a shallow groove between the parastyle and the stylocone, which was for contact with the protoconid of the lower molar (Kielan-Jaworowska et al., 2004). The metacone is smaller and lower than the paracone, but compared to P5, it is more lingually sifted to a position distal to the paracone. The postmetacrista of the metacone extends to the cusp “C” and then continues laterally to the metastyle. The crown corner bearing the metastyle forms one thirds of the labial portion of the crown and is separated to the anterior portion by an open “V”-shaped ectoflexus. There is no precingulum or postcingulum on the anterior and posterior base of the protocone. However, we have discussed the homology issue about the structures termed “cingulum” in a separate section. In general, we proposed that the pre- and postprotocristae are homologous to the corresponding of the cingulum in primitive forms, such as *Peramus* (Davis, 2012), differing from the secondary cingulum in advanced therians.

M2 is generally similar to M1. It differs from the latter in being larger in the crown length and width and in cusp size. It has better developed paraconule and metaconule so that the protoconal area is more robust. The external shelf is wider and the ectoflexus is a broad, smooth arc. In addition, M2 is in better preservation so that it shows that labial to the metaconule the postprotocrista continues as a low, cingulum line ridge and terminates at the mesial surface of the crown below the notch separating the metacone and cusp “C”. The cusp “C” is crest-like, anteroposteriorly compressed.

As in other primitive therians, M3 is smaller (shorter and narrower) than M2 and the corresponding cusps are proportionally small. Particularly, the metastyle region is reduced and the root supporting is thin. However, in other primitive therians, the parastyle lobe of M3 and the preparacrista usually remain little changed compared to M2. In *Jeholotherium*, however, the parastyle and the preparacrista are also reduced so that M3 is notably narrower than M2. The most conspicuous features are that the preprotocrista, showing no sign of the paraconule, forms a crest that connects directly to the anterolingual base of the paracone; this crest forms the sharp edge of a vertical; below this cress and that mesial to the protocone a low cusp exists that extends as a low but distinct cingulum to the parastyle. The postprotocrista and the postmetaconule crista is low and the small metaconule is more labially positioned than in M2. This M3 pattern is to our knowledge unknown in other species of the primitive therians.

**VI. Phylogenetic Analyses**

**Character list**

001. Post-dentary trough (behind tooth row): (0) Present; (1) Absent.

***Kielantherium cuii=*1*; Jeholotherium antiquum=*1; *Liaodelta antiqua=?; Cocotherium*=1; *Microtherulum=*1; *Acristatherium=*1**

002. Post-dentary trough size: (0) large and dorsoventrally broad; (1) dorsal ventrally narrow (reflecting reduced sizes of the postdentary bones.

***Kielantherium cuii=?; Jeholotherium antiquum=?;* *Liaodelta antiqua=?; Cocotherium=?; Microtherulum=?; Acristatherium=?***

003. Separate scars for the surangular/prearticular in the mandible: (0) Present; (1) Absent.

***Kielantherium cuii=*1*; Jeholotherium antiquum=*1; *Liaodelta antiqua=?; Cocotherium*=1; *Microtherulum=*1; *Acristatherium=*1**

004. Overhanging medial ridge above the post-dentary trough (behind the tooth row): (0) Present; (1) Absent.

***Kielantherium cuii=*?; *Jeholotherium antiquum=*?; *Liaodelta antiqua=?; Cocotherium=*?; *Microtherulum=*?; *Acristatherium=*?**

005. Degree of development of Meckel’s sulcus in adults: (0) Well developed; (1) Weakly developed; (2) Vestigial or absent.

***Kielantherium cuii*=1; *Jeholotherium antiquum*=2; *Liaodelta antiqua*=?; *Cocotherium=*2; *Microtherulum=*2*; Acristatherium=*2**

006. Curvature of Meckel’s sulcus (under the tooth row): (0) Parallel to the ventral border of the mandible; (1) Convergent on the ventral border of the mandible.

***Kielantherium cuii*=0; *Jeholotherium antiquum*=0; *Liaodelta antiqua=?; Cocotherium=*0*; Microtherulum*=?; *Acristatherium*=?**

***Liaodelta antiqua=?; Cocotherium* was coded as ch. 2-confined posteriorly in Wang et al., 2022 but see 2025 these are not consistent, so we coded it 0.**

007. Groove for the replacement dental lamina (Crompton’s groove): (0) Present; (1) Absent.

***Kielantherium cuii=*?*; Jeholotherium antiquum=*?*; Liaodelta antiqua=?; Cocotherium=*?*; Microtherulum*=1; *Acristatherium=*?**

008. Mandible angular process: (0) absent; (1) Present.

***Kielantherium cuii*=1; *Jeholotherium antiquum*=1; *Liaodelta antiqua=?; Cocotherium=*1*; Microtherulum=1; Acristatherium=*?**

009. Mandible angular process orientation: (0) Posteroventrally directed (can be slightly inflected); (1) Posteriorly directed, straight; (2) Transversely flaring in having a lateral expansion of the angle); (3) Strongly medially inflected; (4) Bar shape and posterodorsally extended.

***Kielantherium cuii*=0; *Jeholotherium antiquum*=1; *Liaodelta antiqua=?; Cocotherium=*1*; Microtherulum=*1*; Acristatherium=*?**

010. Position of the angular process of the dentary relative to the dentary condyle: (0) Anterior position (the angular process is below the main body of the coronoid process, separated widely from the dentary condyle; (1) Posterior position (the angular process is positioned at the level of the posterior end of the coronoid process, either close to, or directly under the dentary condyle).

***Kielantherium cuii*=1; *Jeholotherium antiquum*=1; *Liaodelta antiqua=?; Cocotherium=*1*; Microtherulum=*1*; Acristatherium=*?**

011. Vertical elevation of the angular process of the dentary relative to the molar alveoli: (0) Angular process low, at or near the level of the ventral border of the mandibular horizontal ramus; (1) Angular process high, at or near the level of the molar alveolar line (and far above the ventral border of the mandibular horizontal ramus).

***Kielantherium cuii*=0; *Jeholotherium antiquum*=0; *Liaodelta antiqua=?; Cocotherium=*0*; Microtherulum=*0*; Acristatherium=?***

012. Flat ventral surface of the mandibular angle: (0) Absent; (1) Present.

***Kielantherium cuii*=0; *Jeholotherium antiquum*=0; *Liaodelta antiqua=?; Cocotherium=*0*; Microtherulum=*0*; Acristatherium=?***

013. Exoflection of the angular process of mandible: (0) Absent; (1) Present.

***Kielantherium cuii*=0; *Jeholotherium antiquum*=0; *Liaodelta antiqua=?; Cocotherium=*0*; Microtherulum=*0*; Acristatherium*=?**

014. Coronoid bone (or its attachment scar): (0) Present and significant; (1) Vestigial; (2) Absent.

***Kielantherium cuii*=1; *Jeholotherium antiquum*=2; *Liaodelta antiqua=?; Cocotherium=*1*; Microtherulum=*2*; Acristatherium=*2**

015. Location of the mandibular foramen (posterior opening of the mandibular canal): (0) Within the postdentary trough or in the posterior part of Meckel’s sulcus; (1) In the pterygoid fossa and offset from Meckel’s sulcus (the intersection of Meckel’s sulcus at the pterygoid margin is ventral and posterior to the foramen); (2) In the pterygoid fossa and in alignment with the posterior end of Meckel’s sulcus; (3) In the pterygoid fossa but not associated with Meckel’s sulcus; (4) Not associated with any of the above structures.

***Kielantherium cuii*=3; *Jeholotherium antiquum*=4; *Liaodelta antiqua*=?; *Cocotherium=*4*; Microtherulum=*?; *Acristatherium=*?**

016. Vertical position of the mandibular foramen: (0) Below the alveolar plane; (1) At or above the alveolar plane.

***Kielantherium cuii*=0; *Jeholotherium antiquum*=0; *Liaodelta antiqua*=?; *Cocotherium=*0*; Microtherulum*=?; *Acristatherium*=?**

017. Concavity or fossa for the reflected lamina of the angular bone on the dentary: (0) Present the medial side; (1) Present on the posterior aspect; (2) Absent.

***Kielantherium cuii*=2; *Jeholotherium antiquum*=2; *Liaodelta antiqua*=?; *Cocotherium=*2*; Microtherulum=*2*; Acristatherium=*?**

018. Splenial bone as a separate element (as indicated by its scar on the dentary): (0) Present; (1) Absent.

***Kielantherium cuii*=1; *Jeholotherium antiquum*=1; *Liaodelta antiqua*=?; *Cocotherium=*1*; Microtherulum=*1; *Acristatherium=*1**

019. Postdentary bone complex: (0) Large, including tall surangular; (1) Angular, surangular, and prearticular medium in height and lying in dentary groove; (2) Single gracile rod, partly fused, and lying in postdentary trough (as inferred from the postdentary trough); (3) surangualar reduced and bones with initial auditory ossicle shape but co-exist with the ossified Meckel’s cartilage; (4) Miniscule as auditory ossicles.

***Kielantherium cuii=*?; *Jeholotherium antiquum=*4; *Liaodelta antiqua*=?; *Cocotherium=*?; *Microtherulum=*4; *Acristatherium=*?**

020. Surangular bone in adult individual: (0) Present; (1) Absent.

***Kielantherium cuii*=1; *Jeholotherium antiquum*=1; *Liaodelta antiqua*=?; *Cocotherium=*1*; Microtherulum=*1; *Acristatherium=*1**

021. Relationship of the postdentary complex (surangular-articular-prearticular, as inferred by presence or absence of the postdentary trough) to the craniomandibular joint (CMJ): (0) Participating in CMJ; (1) Excluded from CMJ.

***Kielantherium cuii*=1; *Jeholotherium antiquum*=1; *Liaodelta antiqua*=?; *Cocotherium=*1*; Microtherulum=*1*; Acristatherium=*1**

022. Separation of the articular/prearticular from the dentary (as inferred by presence or absence of the postdentary trough): (0) Absent; (1) Present.

***Kielantherium cuii*=1; *Jeholotherium antiquum*=1; *Liaodelta antiqua*=?; *Cocotherium=*1; *Microtherulum=*1; *Acristatherium=*1**

023. Separation of the angular from the dentary (as inferred by presence or absence of the postdentary trough): (0) Absent; (1) Present.

***Kielantherium cuii*=1; *Jeholotherium antiquum*=1; *Liaodelta antiqua*=?; *Cocotherium=*1; *Microtherulum=*1; *Acristatherium=*1**

024. Development of the secondary jaw joint (contact): (0) Absent; (1) Present. (New)

***Kielantherium cuii*=1; *Jeholotherium antiquum*=1; *Liaodelta antiqua*=?; *Cocotherium=*1*; Microtherulum=*1*; Acristatherium=*1**

025. Type of the secondary joint: (0) Primary quadrate/articular with secondary surangular/squamosal contact; (1) Primary quadrate/articular with incipient dentary/squamosal contact; (2) Primary dentary/squamosal with reduced quadrate/articular joint; (3) Presence of quadrate/articular joint and dentary-jugal joint. (4) Exclusive dentary/squamosal.

***Kielantherium cuii*=4; *Jeholotherium antiquum*=4; *Liaodelta antiqua*=?; *Cocotherium=*4; *Microtherulum=*4; *Acristatherium=*4**

026. Pterygoid muscle fossa on the medial side of the ramus of the mandible: (0) Absent; (1)

Present.

***Kielantherium cuii*=1; *Jeholotherium antiquum*=1; *Liaodelta antiqua=*?; *Cocotherium=*1; *Microtherulum=*1; *Acristatherium=*?**

027. Medial pterygoid ridge (shelf) along the ventral border of the body of the mandible: (0) Absent; (1) Present; (2) Pterygoid shelf present and reaching the dentary condyle via a low crest.

***Kielantherium cuii=*1; *Jeholotherium antiquum=*1; *Liaodelta antiqua*=?; *Cocotherium=*1; *Microtherulum=*1; *Acristatherium*=?**

028. Presence of anteroventral margin crest for the masseteric fossa: (0) Absent; (1) Present.

***Kielantherium cuii*=1; *Jeholotherium antiquum*=1; *Liaodelta antiqua*=?; *Cocotherium*=1; *Microtherulum*=1; *Acristatherium=*1**

029. Development of anteroventral margin crest for the masseteric fossa: (0) low crest; (1) well-defined crest.

***Kielantherium cuii=*0; *Jeholotherium antiquum=*0; *Liaodelta antiqua*=?; *Cocotherium=*0*; Microtherulum=*0*; Acristatherium=*0**

030. Crest of the masseteric fossa along the anterior border of the coronoid process: (0) Absent or weakly developed; (1) Present and distinctive; (2) Hypertrophied and laterally flaring.

***Kielantherium cuii=*1; *Jeholotherium antiquum=*1; *Liaodelta antiqua*=?; *Cocotherium=*1; *Microtherulum=*1; *Acristatherium=*1**

031. Anteroventral extension of the masseteric fossa: (0) Absent; (1) Extending anteriorly onto the body of the mandible; (2) Further anterior extension below the ultimate premolar/first molar.

***Kielantherium cuii*=0; *Jeholotherium antiquum*=0; 0*Liaodelta antiqua*=?; *Cocotherium=*0; *Microtherulum=*0; *Acristatherium=*0**

032. Labial mandibular foramen inside the masseteric fossa: (0) Absent; (1) Present.

***Kielantherium cuii*=1; Jeholotherium antiquum=1; *Liaodelta antiqua*=?; *Cocotherium=0; Microtherulum=0; Acristatherium=*1.**

033. Posterior vertical shelf of the masseteric fossa connected to the dentary condyle: (0) Absent; (1) Present as a thin crest along the angular margin of mandible.

***Kielantherium cuii*=0; *Jeholotherium antiquum*=0; *Liaodelta antiqua*=?; *Cocotherium=*0; *Microtherulum=*0; *Acristatherium=*0**

034. Posterior-most mental foramen: (0) In the canine and anterior premolariform region (in the saddle behind the canine eminence of the mandible or behind incisor if canine is absent); (1) Below the penultimate premolariform (under the anterior end of the functional postcanine row); (2) Below the ultimate premolar; (3) At the ultimate premolariform and the first molar junction; (4) Under the first molar; (5) At the level of diastema between the incisor and premolar.

***Kielantherium cuii*=2; *Jeholotherium antiquum*=4; *Liaodelta antiqua*=?; *Cocotherium=*2; *Microtherulum=*2; *Acristatherium*=?**

035. Dentary condyle: (0) Absent; (1) Present and formed by inflation of the lateral ridge of the dentary; (2) Present and formed by growth of the lateral wall of the postdentary trough (new state).

***Kielantherium cuii*=1; *Jeholotherium antiquum*=1; *Liaodelta antiqua*=?; *Cocotherium=*1; *Microtherulum*=1; *Acristatherium=*1**

036. Shape and relative size of the dentary condyle: (0) Condyle small for contact with the squamosal but not a load-bearing structure; (1) Condyle as dorsal bending of the lateral ridge but not inflated; (2) Condyle bulbous and laterally off-set (medially supplemented by the reduced articular-quadrate joint); (3) Condyle bulbous and transversely broad with medial extension; (4) Condyle mediolaterally narrow and vertically deep, forming a broad arc in lateral outline, either ovoid or triangular in posterior view. (5) Condyle longitudinally orientated (only known in *Polistodon*). (Modified from the original)

***Kielantherium cuii*=3; *Jeholotherium antiquum*=3; *Liaodelta antiqua*=?; *Cocotherium=*3; *Microtherulum=*3; *Acristatherium=*3**

037. Orientation of the dentary peduncle (condylar process) and condyle: (0) Dentary peduncle more posteriorly directed; (1) Dentary condyle continuous with the semicircular posterior margin of the dentary; the condyle is facing up due to the up-turning of the posterior-most part of the dentary; (2) Dentary articulation extending vertically for the entire depth of the posterior mandibular ramus; it is confluent with the ramus and without a peduncle; the dentary articulation is posteriorly directed; (3) More vertically directed dentary peduncle; (4) Dentary articulation extending vertically for the entire depth of the posterior mandibular ramus.

***Kielantherium cuii*=0; *Jeholotherium antiquum*=0; *Liaodelta antiqua=*?; *Cocotherium=*0; *Microtherulum=*0; *Acristatherium=*0**

038. Ventral (inferior) border of the dentary peduncle: (0) Posteriorly tapering; (1) Columnar and with a lateral ridge; (2) Ventrally flaring; (3) Robust and short; (4) Ventral part of the peduncle and condyle continuous with the ventral border of the mandible.

***Kielantherium cuii*=0; *Jeholotherium antiquum*=3; *Liaodelta antiqua*=?; *Cocotherium=*0; *Microtherulum=*0; *Acristatherium=*?**

039. Gracile and elongate dentary peduncle: (0) Absent; (1) Present.

***Kielantherium cuii=*0; *Jeholotherium antiquum=*0; *Liaodelta antiqua*=?; *Cocotherium=*0; *Microtherulum=*0; *Acristatherium=*0**

040. Position of the dentary condyle relative to the level of the postcanine alveoli: (0) Below or about the same level; (1) Above.

***Kielantherium cuii*=1; *Jeholotherium antiquum*=1; *Liaodelta antiqua=*?; *Cocotherium=*1; *Microtherulum=*1; *Acristatherium=*1**

041. Tilting of the coronoid process of the dentary (measured as the angle between the anterior border of the coronoid process and the horizontal alveolar line of all molars): (0) Coronoid process strongly reclined and the coronoid angle obtuse (≥150°); (1) Coronoid process less reclined (135°-145°); (2) Coronoid process less than vertical (110°-125°); (3) Coronoid process near vertical (95° to 105°).

***Kielantherium cuii*=2; *Jeholotherium antiquum*=2; *Liaodelta antiqua*=?; *Cocotherium=*2; *Microtherulum=*2; *Acristatherium=*1**

042. Gracile base of the coronoid process: (0) Absent; (1) Present.

***Kielantherium cuii*=0; *Jeholotherium antiquum*=0; *Liaodelta antiqua=*?; *Cocotherium=*0; *Microtherulum=*0; *Acristatherium=*0**

043. Height of the coronoid process of the dentary: (0) Not reduced; (1) reduced.

***Kielantherium cuii*=0; *Jeholotherium antiquum*=0; *Liaodelta antiqua=?; Cocotherium=*0; *Microtherulum=*0; *Acristatherium=*0**

044. Alignment of the ultimate molar (or posterior-most postcanine) to the anterior margin of the dentary coronoid process (and near the coronoid scar if present): (0) Ultimate molar medial to the coronoid process; (1) Ultimate molar aligned with the coronoid process.

***Kielantherium cuii*=1; *Jeholotherium antiquum*=1; *Liaodelta antiqua*=?; *Cocotherium=*1; *Microtherulum=*1; *Acristatherium=*1**

045. Direction of lower jaw movement during occlusion (as inferred from teeth): (0) Dorsal (orthal) movement; (1) Dorsomedial movement with a significant medial component; (2) Dorsoposterior uneven movement; (3) Dorsoposterior horizontal movement (modified); (4) essentially horizontal movement with posterolateral translation.

***Kielantherium cuii*=1; *Jeholotherium antiquum*=1; *Liaodelta antiqua*=?; *Cocotherium=*1; *Microtherulum=*1; *Acristatherium=*1**

046. Dentary symphysis: (0) Fused; (1) Unfused.

***Kielantherium cuii*=1; *Jeholotherium antiquum*=1; *Liaodelta antiqua*=?; *Cocotherium=*1; *Microtherulum=*1; *Acristatherium=*1**

047. Relative dentary depth in relation to the length: (0) Shallow; (1) Deep; (2) Short and deep.

***Kielantherium cuii*=0; *Jeholotherium antiquum*=0; 0&1*Liaodelta antiqua=*?; *Cocotherium=*0; *Microtherulum=*0; *Acristatherium=*0**

**DENTITION**

**Incisor**

048. Number of upper incisors: (0) Five; (1) Four; (2) Three; (3) Two; (4) One; (5) No incisors.

***Kielantherium cuii*=?; *Jeholotherium antiquum*=0; *Liaodelta antiqua=*?; *Cocotherium=*1; *Microtherulum=*0; *Acristatherium=*1 -**

049. Size of upper incisors: (0) All small in similar size; (1) Some or all large. (LO96)

***Kielantherium cuii*=?; *Jeholotherium antiquum*=0; *Liaodelta antiqua=*?; *Cocotherium=*0; *Microtherulum=*0; *Acristatherium=*0**

050. I2 enlargement: (0) Absent; (1) Present.

***Kielantherium cuii*=?; *Jeholotherium antiquum*=0; *Liaodelta antiqua*=?; *Cocotherium=*0; *Microtherulum=*0; *Acristatherium=*0**

051. Upper incisor (the enlarged one) mesiodistal length: (0) Shorter than molar; (1) Subequal or longer than molars.

***Kielantherium cuii*=?; *Jeholotherium antiquum*=0; *Liaodelta antiqua*=?; *Cocotherium=*0; *Microtherulum=*0; *Acristatherium*=0**

052. Number of cusps on posterior (main) upper incisors: (0) One; (1) two or more.

***Kielantherium cuii*=?; *Jeholotherium antiquum*=0; *Liaodelta antiqua=*?; *Cocotherium=*0; *Microtherulum=*0; *Acristatherium*=0**

053. Upper anterior-most incisor enamel: (0) Covers the whole incisor; (1) Restricted anteriorly.

***Kielantherium cuii*=?; *Jeholotherium antiquum*=0; *Liaodelta antiqua=*?; *Cocotherium=*0; *Microtherulum=*0; *Acristatherium=*0**

054. Upper incisor or incisors, position all implanted at or near margin of palate (0); distal incisors implanted medial to margin of palate (1).

***Kielantherium cuii*=?; *Jeholotherium antiquum*=0; *Liaodelta antiqua*=?; *Cocotherium=*0; *Microtherulum=*0; *Acristatherium=*0**

055. Upper enlarged incisor with open root: (0) Absent; (1) Present.

***Kielantherium cuii*=?; *Jeholotherium antiquum*=0; *Liaodelta antiqua*=?; *Cocotherium=*0; *Microtherulum=*0; *Acristatherium=*0**

056. Ultimate and penultimate upper incisors - morphology: (0) Peg-like; (1) Spoon-shaped to rhomboid-shaped in lateral view; (2) Spatulate in lateral view; (3) Ultimate and/or penultimate upper incisors bicuspate or tricuspate.

***Kielantherium cuii*=?; *Jeholotherium antiquum*=0; *Liaodelta antiqua*=?; *Cocotherium=*0; *Microtherulum=*0; *Acristatherium=*0**

057. Flat contact facet on medial surface of enlarged upper incisor (presumably I2): (0) Absent; (1) Present.

***Kielantherium cuii=*0; *Jeholotherium antiquum=*0; *Liaodelta antiqua*=?; *Cocotherium=*0; *Microtherulum=*0; *Acristatherium=*0**

058. Upper incisor cusp fluting (enamel ridges) on cusps: (0) Absent; (1) weakly developed; (2) Extensive.

***Kielantherium cuii*=?; *Jeholotherium antiquum*=0; *Liaodelta antiqua*=?; *Cocotherium=*0; *Microtherulum=*0; *Acristatherium=*0**

059. Number of lower incisors: (0) Four or more; (1) Three; (2) Two; (3) One; (4) None.

***Kielantherium cuii*=0; *Jeholotherium antiquum*=0; *Liaodelta antiqua*=?; *Cocotherium=*2; *Microtherulum=*1; *Acristatherium=*2**

060. Lower anterior-most incisor enamel: (0) Covers the whole incisor; (1) Restricted anteriorly.

***Kielantherium cuii*=0; *Jeholotherium antiquum*=0; *Liaodelta antiqua=?; Cocotherium=*0; *Microtherulum=*0; *Acristatherium=*0**

061. Lower enlarged incisor with open root: (0) Absent; (1) Present.

***Kielantherium cuii*=0; *Jeholotherium antiquum*=0; *Liaodelta antiqua=?; Cocotherium=*0; *Microtherulum=*0; *Acristatherium=*0**

062. Lower enlarged incisor position of distal end of root relative to postcanines: (0) Mesial to

level of premolars; (1) Opposite level of premolars; (2) Opposite level of molars.

***Kielantherium cuii*=0; *Jeholotherium antiquum*=0; *Liaodelta antiqua=*?; *Cocotherium=*0; *Microtherulum=*0; *Acristatherium*=0**

063. Procumbency and enlargement of the lower anterior-most incisor: (0) Absent; (1) Present (at least 50% longer than the adjacent incisor).

***Kielantherium cuii*=0; *Jeholotherium antiquum*=0; *Liaodelta antiqua*=?; *Cocotherium=*0; *Microtherulum=*0; *Acristatherium*=0**

064. Diastema distal to ultimate lower incisor: (0) Absent; (1) Present.

***Kielantherium cuii*=0; *Jeholotherium antiquum*=0; *Liaodelta antiqua*=?; *Cocotherium=*0; *Microtherulum=*0; *Acristatherium=***

**Canine**

065. Upper canine: (0) Present; (1) Absent.

***Kielantherium cuii*=0; *Jeholotherium antiquum*=0; *Liaodelta antiqua*=?; *Cocotherium*=0; *Microtherulum*=0 *Acristatherium=*0**

066. Upper canine size: (0) larger than neighboring teeth; (1) similar to or smaller than neighboring teeth.

***Kielantherium cuii*=0; *Jeholotherium antiquum*=0; *Liaodelta antiqua*=?; *Cocotherium*=0; *Microtherulum*=0; *Acristatherium=*0**

067. Upper canine cusp number: (0) Peg-like with single cusp; (1) two or more cusps.

***Kielantherium cuii*=0; *Jeholotherium antiquum*=0; *Liaodelta antiqua=?; Cocotherium=*0; *Microtherulum*=0; *Acristatherium=*0**

068. Number of upper canine roots: (0) One; (1) Two.

***Kielantherium cuii*=1; *Jeholotherium antiquum*=1; *Liaodelta antiqua=?; Cocotherium=*0; *Microtherulum*=0; *Acristatherium=*0**

069. Lower canine, presence. (0) Present; (1) Absent.

***Kielantherium cuii*=0; *Jeholotherium antiquum*=0; *Liaodelta antiqua=?; Cocotherium=*0; *Microtherulum*=0; *Acristatherium=*0**

070. Lower canine, size larger than neighboring teeth (0); similar to or smaller than neighboring teeth (1).

***Kielantherium cuii*=0; *Jeholotherium antiquum*=1; *Liaodelta antiqua=?; Cocotherium=*0; *Microtherulum*=0; *Acristatherium=*0**

071. Number of lower canine roots: (0) One; (1) Two.

***Kielantherium cuii*=0; *Jeholotherium antiquum*=1; *Liaodelta antiqua=?; Cocotherium=*0; *Microtherulum*=0; *Acristatherium=*0**

072. Replacement pattern of incisors (0) More than one replacement; (1) One replacement; (2) No replacement.

***Kielantherium cuii*=?; *Jeholotherium antiquum*=?; *Liaodelta antiqua=?; Cocotherium=*?; *Microtherulum=*?; *Acristatherium*=?**

073. Diastema distal to lower canine (only applicable if canine present): (0) Present; (1). Absent.

***Kielantherium cuii*=0; *Jeholotherium antiquum*=0/1; *Liaodelta antiqua=?; Cocotherium=*1; *Microtherulum=*1; *Acristatherium=*0**

**Premolar**

074. Upper postcanine teeth differentiated into premolariforms and molariforms: (0) Absent; (1) Initial morphological differentiation; (2) Well developed; (3) Secondarily lost the teeth or tooth differentiation.

***Kielantherium cuii*=2; *Jeholotherium antiquum*=2; *Liaodelta antiqua=*2; *Cocotherium=*2; *Microtherulum=*2; *Acristatherium=*2**

075. Number of upper premolariforms in adult: (0) Five or more; (1) Four; (2) Three; (3) Two; (4) One; (5) None. (This character has been reconstructed given the tooth homology.)

***Kielantherium cuii=*1*; Jeholotherium antiquum=*0; *Liaodelta antiqua=*?*; Cocotherium=*0; *Microtherulum=*0; *Acristatherium=*0**

076. Molariform deciduous upper premolariform at fifth locus (dP5) in adult (scored for zatherians): (0) Present; (1) Replaced by P5

***Kielantherium cuii=*0*; Jeholotherium antiquum=*1; *Liaodelta antiqua*=0; *Cocotherium=*1*; Microtherulum=*1; *Acristatherium=*1**

077. Upper premolariform reduction presumably at third locus: (0) Absent; (1) Present.

***Kielantherium cuii*=0; *Jeholotherium antiquum*=0; *Liaodelta antiqua=*?; *Cocotherium=*0*; Microtherulum=*0; *Acristatherium=*0**

078. Upper premolariform reduction at first locus: (0) Absent; (1) Present.

***Kielantherium cuii*=0; *Jeholotherium antiquum*=0; *Liaodelta antiqua=?; Cocotherium=*0*; Microtherulum=*0; *Acristatherium=*0**

079. Replacement of at least some posterior functional molariform postcanines: (0) Present; (1) Absent; (2) Sequential addition of postcanines but no replacement.

***Kielantherium cuii*=1; *Jeholotherium antiquum*=1; *Liaodelta antiqua*=1*; Cocotherium=*1; *Microtherulum=*1; *Acristatherium=*1**

080. Procumbency and diastema of first (functional) upper premolariform or postcanine in relation to the upper canine: (0) Not procumbent and without diastema; (1) Procumbent and with diastema.

***Kielantherium cuii*=0; *Jeholotherium antiquum*=0; *Liaodelta antiqua=*?; *Cocotherium=*0; *Microtherulum=*0; *Acristatherium=*0**

081. Upper penultimate premolariform size (length): (0) Small (smaller than mesial molar); (1) Large (subequal to or larger than mesial molar). (Original: Upper penultimate premolar size: (0) Small (smaller than M1); (1) Large (subequal to or larger than M1).

***Kielantherium cuii*=0; *Jeholotherium antiquum*=0; *Liaodelta antiqua*=?; *Cocotherium=*0*; Microtherulum=*0*; Acristatherium=*0**

082. Upper penultimate premolariform shape: (0) One main cusp (triconodont); (1) three or four cusps but not aligned in line (multituberculates); (2) Basined with multiple cusps.

***Kielantherium cuii*=0; *Jeholotherium antiquum*=0; *Liaodelta antiqua=*?*; Cocotherium=*0; *Microtherulum=*0; *Acristatherium=*0**

083. Ultimate upper premolariform with two rows of multiple cusps: (0) Absent; (1) Present.

***Kielantherium cuii*=0; *Jeholotherium antiquum*=0; *Liaodelta antiqua=*0; *Cocotherium=*0; *Microtherulum=*0; *Acristatherium=*0**

084. Upper ultimate and penultimate premolariform basined (with main cusps located peripherally surrounding a central basin): (0) Absent; (1) Present.

***Kielantherium cuii*=0; *Jeholotherium antiquum*=0; *Liaodelta antiqua*=0; *Cocotherium=*0; *Microtherulum=*0; *Acristatherium*=0**

085. Upper ultimate and penultimate premolariform central basin: (0) the mesial end open; (1) the mesial end closed (may be trenched when deeply worn).

***Kielantherium cuii*=?; *Jeholotherium antiquum*=?; *Liaodelta antiqua=*?; *Cocotherium=*?; *Microtherulum=*?; *Acristatherium*=?**

086. Ultimate upper premolariform width relative to the first upper molar: (0) Ultimate upper premolariform transversely narrower than, or subequal to, the first upper molar; (1) Ultimate upper premolariform transversely wider than the first upper molar.

***Kielantherium cuii*=0; *Jeholotherium antiquum*=0; *Liaodelta antiqua*=0; *Cocotherium=*0; *Microtherulum=*0; *Acristatherium*=0**

087. Enamel ridges or flutings on cusps of upper premolariforms: (0) Absent; (1) Present.

***Kielantherium cuii*=0; *Jeholotherium antiquum*=0; *Liaodelta antiqua=*0; *Cocotherium=*0; *Microtherulum=*0; *Acristatherium=*0**

088. Upper premolariform at fifth locus - metastylar lobe: (0) Small or absent; (1) Enlarged and wing-like. {Original: Ultimate upper premolar - metastylar lobe: (0) Small or absent; (1) Enlarged and wing-like.}

***Kielantherium cuii*=?; *Jeholotherium antiquum*=1; *Liaodelta antiqua=*?; *Cocotherium=*1; *Microtherulum=*0; *Acristatherium=*1**

089. Upper premolariform at fifth locus - metacone or metaconal swelling: (0) Absent; (1) Present.

{Original: Ultimate upper premolar - metacone or metaconal swelling: (0) Absent; (1) Present.}

***Kielantherium cuii*=?; *Jeholotherium antiquum*=1; *Liaodelta antiqua=*?; *Cocotherium*=1; *Microtherulum=*1; *Acristatherium=*1**

090. Upper premolariform at fifth locus protocone or protoconal swelling: (0) Little or no lingual swelling; (1) Present. {Original: Ultimate upper premolariform – lingual cusp (protocone) or protoconal swelling: (0) Little or no lingual swelling; (1) Present.}

***Kielantherium cuii*=?; *Jeholotherium antiquum*=0; *Liaodelta antiqua=*?*; Cocotherium=*1; *Microtherulum=*1; *Acristatherium*=0**

091. Upper premolariform at fifth locus protocone size: (0) Small; (1) Large and lingually extended.

***Kielantherium cuii*=?; *Jeholotherium antiquum*=0; *Liaodelta antiqua=?; Cocotherium=*0; *Microtherulum=*0; *Acristatherium*=0**

092. Upper premolariform at fourth locus - lingual cusp (protocone) or protoconal swelling: (0) Little or no lingual swelling; (1) Protoconal swelling; (2) Distinctive and functional protocone. {Original: Penultimate upper premolar lingual cusp (protocone) or protoconal swelling: (0) Little or no lingual swelling; (1) Protoconal swelling; (2) Distinctive and functional protocone.}

***Kielantherium cuii=*0; *Jeholotherium antiquum=*0; *Liaodelta antiqua=*0; *Cocotherium*=1; *Microtherulum*=1; *Acristatherium=*0**

093. Position of the upper premolariform with the tallest cusp within the premolariform series: (0) No premolariform standing out; (1) In fourth premolariform locus. {Original: Position of the upper premolar with the tallest cusp within the premolar series: (0) No premolar standing out; (1) In ultimate premolar position; (2) In penultimate premolar position.}

***Kielantherium cuii*=1; *Jeholotherium antiquum*=1; *Liaodelta antiqua=*1*; Cocotherium=*1; *Microtherulum=*1; *Acristatherium*=1**

094. Diastema posterior to the mesial upper premolariform (applicable to taxa with premolarmolar differentiation): (0) Absent; (1) Present; (2) Present and more than the length of P1. (state 2 is based on Wang et al., 2025, but we didn’t code *Henkelotherium*).

***Kielantherium cuii*=0; *Jeholotherium antiquum*=1; *Liaodelta antiqua=?; Cocotherium=*1; *Microtherulum=*0; *Acristatherium*=1**

095. Size of third upper premolariform relative to second upper premolariform (only scored for taxa with five upper premolars): (0) Lager; (1) Subequal or smaller.

***Kielantherium cuii*=?; *Jeholotherium antiquum*=1; *Liaodelta antiqua*=?; *Cocotherium=*1; *Microtherulum=*1; *Acristatherium*=1**

096. Diastema posterior to third upper premolariform (only scored for taxa with five upper premolars): (0) Absent; (1) Present.

***Kielantherium cuii*=?; *Jeholotherium antiquum*=1; *Liaodelta antiqua*=?; *Cocotherium=*0; *Microtherulum=*1; *Acristatherium*=1**

097. Ultimate upper premolariform stylar shelf: (0) Absent or not continuous; (1) Continuous.

***Kielantherium cuii*=1; *Jeholotherium antiquum*=1; *Liaodelta antiqua*=?; *Cocotherium=*1; *Microtherulum=*1; *Acristatherium*=1**

098. Ultimate upper premolariform parastylar and metastylar lobes: (0) Absent or insignificant; (1) Subequal; (2) Parastylar lobe larger; (3) Metastylar lobe larger.

***Kielantherium cuii*=2; *Jeholotherium antiquum*=1; *Liaodelta antiqua*=?; *Cocotherium=*1; *Microtherulum=*1; *Acristatherium*=1**

099. Penultimate upper premolariform: tallest cusp position within cusp row: (0) Central in single cusp row; (1) Tallest cusp mesial in single cusp row; with cusps decreasing height distally; (2) Tallest cusp on buccal row; (3) Cusps even.

***Kielantherium cuii*=1; *Jeholotherium antiquum*=1; *Liaodelta antiqua=?; Cocotherium=*1; *Microtherulum=*1; *Acristatherium*=1**

100. Upper ultimate premolariform shape: (0) One main cusp (triconodont); (1) Multiple subequal sized cusps but not basined (multituberculates); (2) Mesiodistally trough with multiple cusps; (3) Basined with multiple cusps on crown margin; (4) Cusps coalesced and small.

***Kielantherium cuii*=0; *Jeholotherium antiquum*=0; *Liaodelta antiqua=*0; *Cocotherium=*0 *Microtherulum=*0; *Acristatherium*=0**

101. Upper ultimate premolariform primary wear facet position: (0) On the lingual side of tooth; (1) In the trough or basin center.

***Kielantherium cuii*=0; *Jeholotherium antiquum*=0; *Liaodelta antiqua=*0; *Cocotherium=*0; *Microtherulum=*0; *Acristatherium*=0**

102. Upper ultimate premolariform size: (0) subequal to or smaller than M1; (1) Larger than M1.

***Kielantherium cuii*=0; *Jeholotherium antiquum*=0; *Liaodelta antiqua=*0*; Cocotherium=*0; *Microtherulum=*0; *Acristatherium*=0**

103. Upper ultimate premolariform cusp A1 (for taxa with multi-cusp rows; this is the distobuccal cusp): (0) Not significantly larger than other mesial cusps; (1) significantly enlarged and extending buccal-distally.

***Kielantherium cuii*=?; *Jeholotherium antiquum*=?; *Liaodelta antiqua=?; Cocotherium=*?; *Microtherulum=*?; *Acristatherium*=?**

104. Cuspules and/or enamel ridges (flutings) in central basin of upper premolariform (for taxa with multi-cusp rows): (0) Absent; (1) Present.

***Kielantherium cuii*=?; *Jeholotherium antiquum*=?; *Liaodelta antiqua=?; Cocotherium=*?; *Microtherulum=*?; *Acristatherium*=?**

105. Ultimate upper premolariform-molariform interlocking: (0) Absent; (1) Present.

***Kielantherium cuii*=0; *Jeholotherium antiquum*=0; *Liaodelta antiqua*=0*; Cocotherium=*0; *Microtherulum=*0; *Acristatherium*=0**

106. Ultimate upper premolariform occlusal profile heart-shape with apex pointing distally: (0) Absent; (1) Present.

***Kielantherium cuii*=0; *Jeholotherium antiquum*=0; *Liaodelta antiqua*=0; *Cocotherium=*0; *Microtherulum=*0; *Acristatherium*=0**

**Lower premolars**

107. Lower postcanine teeth differentiated into premolariform and molariform teeth: (0) Absent; (1) Initial morphological differentiation; (2) Well developed; (3) Secondarily lost the teeth or tooth differentiation.

***Kielantherium cuii*=2; *Jeholotherium antiquum*=2; *Liaodelta antiqua*=?; *Cocotherium=*2*; Microtherulum=*2 *Acristatherium=*2**

108. Number of lower premolariforms: (0) Five or more; (1) Four; (2) Three; (3) Two; (4) One; (5) None.

***Kielantherium cuii=*1*; Jeholotherium antiquum=*0; *Liaodelta antiqua=?; Cocotherium=*0; *Microtherulum=*0; *Acristatherium=*0**

109. Molariform deciduous lower premolariform at fifth locus (dp5) in adult (scored for zatherians): (0) Present; (1) Replaced by p5.

***Kielantherium cuii=*0*; Jeholotherium antiquum=*1; *Liaodelta antiqua=*?; *Cocotherium*=1; *Microtherulum=*1; *Acristatherium=*1**

110. Lower premolariform reduction at third locus (scored for zatherians): (0) Absent; (1) Present.

***Kielantherium cuii*=0; *Jeholotherium antiquum*=0; *Liaodelta antiqua=*?; *Cocotherium=*0*; Microtherulum=*0; *Acristatherium=*0**

111. Lower premolariform reduction at first locus (scored for zatherians): (0) Absent; (1) Present.

***Kielantherium cuii*=0; *Jeholotherium antiquum*=0; *Liaodelta antiqua*=?; *Cocotherium=*0*; Microtherulum=*0; *Acristatherium=*0**

112. Diastema separating the lower first and second premolariforms (defined as the first and second functioning premolariform or premolariform postcanine): (0) Absent (gap less than one tooth root for whichever is smaller of the adjacent teeth); (1) Present, subequal to one tooth-root diameter or more; (2) Present, equal to or more than one-tooth length.

***Kielantherium cuii*=0; *Jeholotherium antiquum*=0; *Liaodelta antiqua*=?; *Cocotherium=*0; *Microtherulum=*0; *Acristatherium*=0**

113. Ultimate lower premolariform bladed or crenulated: (0) Absent; (1) Present.

***Kielantherium cuii*=0; *Jeholotherium antiquum*=0; *Liaodelta antiqua*=?; *Cocotherium=*0; *Microtherulum=*0; *Acristatherium*=0**

114. Hypertrophic mesial cusp (larger than half of the tooth) on ultimate lower premolariform: (0) Absent; (1) Present.

***Kielantherium cuii*=0; *Jeholotherium antiquum*=0; *Liaodelta antiqua*=?; *Cocotherium=*0; *Microtherulum=*0; *Acristatherium*=0**

115. Ultimate lower premolariform cusp row and shape (for taxa with two cusp rows): (0) Distal portion of crown with two cusp rows; (1) cusp a1 predominant and the distal portion reduced to small heel.

***Kielantherium cuii*=?; *Jeholotherium antiquum*=?; *Liaodelta antiqua*=?; *Cocotherium=*?; *Microtherulum=*?; *Acristatherium*=?**

116. Ultimate lower premolariform recess between a1 and a2 on the lingual side: (0) Absent; (1) Present.

***Kielantherium cuii*=?; *Jeholotherium antiquum*=?; *Liaodelta antiqua*=?; *Cocotherium=*?; *Microtherulum=*?; *Acristatherium*=?**

117. Ultimate lower premolariform main cusp shape in lateral view: (0) Tall and pointed or triangular; (1) low and squared or arched; (2) Low and conical; (3) Molariform.

***Kielantherium cuii*=0; *Jeholotherium antiquum*=0; *Liaodelta antiqua*=?; *Cocotherium=*0; *Microtherulum=*0; *Acristatherium*=0**

118. Ultimate lower premolariform serrations: (0) Absent; (1) Present.

***Kielantherium cuii*=0; *Jeholotherium antiquum*=0; *Liaodelta antiqua*=?; *Cocotherium=*0; *Microtherulum=*0; *Acristatherium*=0**

119. Ultimate lower premolariform serrations morphology: (0) Few and uneven with little ridge; (1) Numerous and even with distinct ridges on the lingual and/or buccal side of the crown.

***Kielantherium cuii*=?; *Jeholotherium antiquum*=?; *Liaodelta antiqua*=?; *Cocotherium=*?; *Microtherulum=*?; *Acristatherium*=?**

120. Ultimate lower premolariform – symmetry of the main (middle) cusp a (= protoconid): (0) Asymmetrical (anterior edge of cusp a is more convex in outline than the posterior edge); (1) Symmetrical (anterior and posterior cutting edges are equal or subequal in length; neither edge is more convex or concave than the other in lateral profile).

***Kielantherium cuii*=?; *Jeholotherium antiquum*=1; *Liaodelta antiqua*=?; *Cocotherium=*1; *Microtherulum=*1; *Acristatherium*=1**

121. Ultimate lower premolariform anterior cusp b (=paraconid): (0) Absent or indistinctive; (1) Present and distinctive; (2) Enlarged.}

***Kielantherium cuii*=?; *Jeholotherium antiquum*=1; *Liaodelta antiqua*=?; *Cocotherium=*1; *Microtherulum=*1; *Acristatherium*=1**

122. Lower ultimate premolariform cusp alignment: (0) Principal cusps mesiodistally aligned; (1) Principal cusps arranged in triangle; (2) Principal cusps arranged in quadrangle; (3) Principal cusps coalesced.

***Kielantherium cuii*=?; *Jeholotherium antiquum*=0; *Liaodelta antiqua*=?; *Cocotherium=*1; *Microtherulum=*1; *Acristatherium*=1**

123. Lower ultimate premolariform distal cingulid or cingular cuspule (in addition to cusp c or the metaconid if the latter cusp is present on a triangulated trigonid): (0) Absent or indistinctive; (1) Present; (2) Present, in addition to cusp c or the c swelling; (3) Presence of the continuous posterior (distal) cingulid at the base of the crown.

***Kielantherium cuii*=?; *Jeholotherium antiquum*=1; *Liaodelta antiqua*=?; *Cocotherium=*1; *Microtherulum=*1; *Acristatherium*=1**

124. Lower ultimate premolariform outline: (0) transversely compressed, crown outline longer than wide; (1) Crown outline subequal or wider than long; (2) Buccolingually very compressed, blade-like; (3) Peg-like and small. (M059, K399)

***Kielantherium cuii*=?; *Jeholotherium antiquum*=0; *Liaodelta antiqua*=?; *Cocotherium=*0; *Microtherulum=*0; *Acristatherium*=0**

125. Penultimate or ultimate lower premolariform with carnassial shearing notch in the middle of the tooth (score on anterior postcanines in taxa where premolars undifferentiated from molars): (0) Absent; (1) Present. (M061)

***Kielantherium cuii*=1; *Jeholotherium antiquum*=1; *Liaodelta antiqua*=?; *Cocotherium=*1; *Microtherulum=*1; *Acristatherium*=1**

126. Lower premolariform presence of a distinctive cingulid with cuspules or crenulated: (0) Absence of crenulation or cuspules on cingulid row; (1) Present and labially positioned; (2) Present and lingually positioned.

***Kielantherium cuii*=0; *Jeholotherium antiquum*=0; *Liaodelta antiqua=*?; *Cocotherium=*0; *Microtherulum=*0; *Acristatherium*=?**

127. Ultimate lower premolariform – labial cingulid: (0) Absent or vestigial; (1) Present (at least along the length of more than half of the crown); (2) Cuspate distal cingulid.

***Kielantherium cuii*=?; *Jeholotherium antiquum*=0; *Liaodelta antiqua=?; Cocotherium=*0; *Microtherulum=*0; *Acristatherium*=0**

128. Ultimate lower premolariform – lingual cingulid: (0) Absent or vestigial; (1) Present.

***Kielantherium cuii*=?; *Jeholotherium antiquum*=0; *Liaodelta antiqua=?; Cocotherium=*0; *Microtherulum=*0; *Acristatherium*=0**

129. Ultimate lower premolariform – relative height of primary cusp a to cusp c (measured as the height ratio of a and c from the bottom of the valley between the two adjacent cusps): (0) Indistinctive; (1) Posterior cusp c distinctive but less than 30% of the primary cusp a.

***Kielantherium cuii*=?; *Jeholotherium antiquum*=1; *Liaodelta antiqua=?; Cocotherium=*1; *Microtherulum=*0; *Acristatherium*=?**

130. Penultimate lower premolariform – paraconid (=cusp b): (0) Absent; (1) Present but not distinctive; (2) Distinctive and slightly enlarged.

***Kielantherium cuii*=2; *Jeholotherium antiquum*=1; *Liaodelta antiqua=?; Cocotherium=*1; *Microtherulum=*1; *Acristatherium*=1**

131. Penultimate lower premolariform – labial cingulid: (0) Absent; (1) Present.

***Kielantherium cuii*=0; *Jeholotherium antiquum*=0; *Liaodelta antiqua=?; Cocotherium=*0; *Microtherulum=*0; *Acristatherium*=0**

132. Elongation of posterior premolariforms: (0) Absent; (1) Present.

***Kielantherium cuii*=0; *Jeholotherium antiquum*=0; *Liaodelta antiqua=?; Cocotherium=*0; *Microtherulum=*0; *Acristatherium*=0**

133. Third lower premolariform size to second (only scored for taxa with five lower premolars): (0) Longer; (1) Shorter.

***Kielantherium cuii*=?; *Jeholotherium antiquum*=0; *Liaodelta antiqua=*?; *Cocotherium=*0; *Microtherulum=*0；*Acristatherium*=0**

134. Lower ultimate premolariform submolariform with pseudotalonid (sharp morphological change from the penultimate premolar) (for those with molar and premolar differentiation): (0) Absent; (1) Present.

***Kielantherium cuii*=0; *Jeholotherium antiquum*=0; *Liaodelta antiqua=*?; *Cocotherium=*0; *Microtherulum=*0；*Acristatherium*=0**

**Upper Molar**

135. Number of upper molariform postcanines in adult individual: (0) Six or more; (1) Five; (2) Four; (3) Three; (4) Two; (5) Molar lost.

***Kielantherium cuii*=2; *Jeholotherium antiquum*=3; *Liaodelta antiqua*=2; *Cocotherium=*3; *Microtherulum=*3; *Acristatherium*=3**

136. Total number of upper postcanine loci in adult individual: (0) More than eight; (1) Eight; (2) Seven; (3) Six; (4) Five; (5) Four; (6) Three; (7) Postcanine lost in adult.

***Kielantherium cuii*=1; *Jeholotherium antiquum*=1; *Liaodelta antiqua=?; Cocotherium=*1; *Microtherulum=*1; *Acristatherium*=1**

137. Number of upper molariform of zatherians: (0) Four; (1) Three.

***Kielantherium cuii*=0; *Jeholotherium antiquum*=1; *Liaodelta antiqua*=0; *Cocotherium=*1; *Microtherulum=*1; *Acristatherium*=1**

138. Development of three distinct main cusps (A=paracone, B=parastyle or stylocone, C=metacone) on upper molar(iform): (0) Absent; (1) Initial; (2) Present.

***Kielantherium cuii*=2; *Jeholotherium antiquum*=2; *Liaodelta antiqua*=2*; Cocotherium=*2; *Microtherulum=*2; *Acristatherium*=2**

139. Development of two or three rows of cusps on upper molar(iform): (0) Absent; (1) Present.

***Kielantherium cuii*=0; *Jeholotherium antiquum*=0; *Liaodelta antiqua=?; Cocotherium=*0; *Microtherulum=*; *Acristatherium*=0**

140. Row number of functional cusps on upper molar(iform) (for taxa with two or three cusp rows): (0) Two rows; (1) Development of a central row; (2) Three rows of primary cusps; (3) three rows formed by addition of the secondary cusp row.

***Kielantherium cuii*=?; *Jeholotherium antiquum*=?; *Liaodelta antiqua=*?; *Cocotherium=*?; *Microtherulum=*?; *Acristatherium*=?**

141. The mesial U-ridge of upper molars with multi-rows of cusps: (0) Absent; (1) Present; (2) Closed by cuspules.

***Kielantherium cuii*=?; *Jeholotherium antiquum*=?; *Liaodelta antiqua=*?; *Cocotherium=*?; *Microtherulum=*?; *Acristatherium*=?**

142. Cuspules and/or transverse fluting of the central basin on upper molars: (0) Absent; (1) Present.

***Kielantherium cuii*=?; *Jeholotherium antiquum*=?; *Liaodelta antiqua=*?; *Cocotherium=*?; *Microtherulum=*?; *Acristatherium*=?**

143. Position of cusp A1 on upper molars (for taxa with multi-rows of multi-cusps): (0) A1 is at the same level as B1 or slightly distal; (1) A1 is distinctively distal to B1 owing to expansion of A1.

***Kielantherium cuii*=?; *Jeholotherium antiquum*=?; *Liaodelta antiqua*=?; *Cocotherium=*?; *Microtherulum=*?; *Acristatherium*=?**

144. Upper molar row-A (labial) cusp row with three subequally spaced main cusps (for those with two-rows of multi-cusps): (0) Present; (1) Absent.

***Kielantherium cuii*=?; *Jeholotherium antiquum*=?; *Liaodelta antiqua*=?; *Cocotherium=*?; *Microtherulum=*?; *Acristatherium*=?**

145. Triangulation of main cusps in the posterior upper molars: (0) Absent; (1) Present.

***Kielantherium cuii*=1; *Jeholotherium antiquum*=1; *Liaodelta antiqua*=1; *Cocotherium=*1; *Microtherulum=*1; *Acristatherium*=1**

146. B1 cusp on the upper molar (applicable to molars with triangulation): (0) Absent; (1) Present.

***Kielantherium cuii*=0; *Jeholotherium antiquum*=0; *Liaodelta antiqua=*0; *Cocotherium=*0; *Microtherulum=*0; *Acristatherium*=0**

147. Rank of postvallum shear (on the upper second molar; applicable to molars with reversed triangulation of cusps): (0) Present but only by the first rank: postmetacrista; (1) Present, with the addition of a second rank (postprotocrista below postmetacrista) but the second rank does not reach labially below the base of the metacone; (2) Metacingulum/metaconule present, in addition to postprotocrista, but the metacingulum crest does not extend beyond the base of the metacone; (3) Metacingulum extended beyond metacone; (4) Metacingulum extended to the metastylar lobe.

***Kielantherium cuii*=0; *Jeholotherium antiquum=*1; *Liaodelta antiqua=*1; *Cocotherium=*1; *Microtherulum=*3; *Acristatherium*=1**

148. Postcingulum: (0) Absent or weak; (1) Present; (2) Present and reaching past the metaconule.

***Kielantherium cuii*=0; *Jeholotherium antiquum*=0; *Liaodelta antiqua=*0; *Cocotherium=*1; *Microtherulum=*0; *Acristatherium*=0**

149. Size (labiolingual width) of the upper molar labial stylar shelf: (0) Absent; (1) Present and narrow; (2) Present and broad.

***Kielantherium cuii*=2; *Jeholotherium antiquum*=2; *Liaodelta antiqua=*2*; Cocotherium=*2; *Microtherulum=*2; *Acristatherium*=2**

150. Presence vs. absence of the ectoflexus on the upper second molar (or postcanines in the middle portion of the postcanine row): (0) Absent or weakly developed; (1) Present.

***Kielantherium cuii*=1; *Jeholotherium antiquum*=1; *Liaodelta antiqua=*1; *Cocotherium=*1*; Microtherulum=*1; *Acristatherium=*1**

151. Ectoflexus gradient along the molar series: (0) Present on penultimate molar, but weakly developed or absent on the anterior molars; (1) Present on the penultimate and preceding molars.

***Kielantherium cuii*=0; *Jeholotherium antiquum*=1; *Liaodelta antiqua=*1; *Cocotherium=*1; *Microtherulum=*1; *Acristatherium*=1**

152. Morphological features on the labial cingulum or stylar shelf of the upper molars (excluding the parastyle and metastyle): (0) Indistinctive or absent; (1) Distinctive cingulum, without cuspules; (2) Individualized or even hypertrophied cuspules; (3) Cingulum even-sized multiple cuspules; (4) Cingulum crenulated with labially projected cuspules so that the main cusps are more lingually offset. (Modified from the original)

***Kielantherium cuii*=1; *Jeholotherium antiquum*=1; *Liaodelta antiqua=*1; *Cocotherium=*1; *Microtherulum=*1; *Acristatherium=*1**

153. Primary lingual cingulum on upper molar(iforms): (0) Absent or with incipient cingulum; (1) Present.

***Kielantherium cuii*=1; *Jeholotherium antiquum*=1; *Liaodelta antiqua=*1; *Cocotherium*=1; *Microtherulum*=1; *Acristatherium*=1**

154. Development of the protocone: (0) Absent; (1) Present. {Original: 142. Shape of the lingual cingulum in upper molars: (0) Narrow cingulum; (1) Expanded to form the lingual cusp (protocone).}

***Kielantherium cuii*=1; *Jeholotherium antiquum*=1; *Liaodelta antiqua=*1; *Cocotherium=*1; *Microtherulum=*1; *Acristatherium=*1**

155. Size of the protocone: (0) Small; (1) Intermediate; (2) Extensive {Original: Upper molar lingual cusp: (0) Functional cusp and lingual swelling absent; (1) Functional cusp absent, but the lingual side is more swollen than the labial side at the cingular level; (2) Functional cusp present but small; (3) Functional cusp large}

***Kielantherium cuii*=0; *Jeholotherium antiquum*=1; *Liaodelta antiqua=*1; *Cocotherium=*1; *Microtherulum=*1; *Acristatherium*=1**

156. Upper molar basin (trigon basin) between the lingual cusp and labial cusps (paracone and metacone) that receives cusp d (hypoconid) in occlusion: (0) Absent: (1) Initial and may not be functional; (2) Present and functional.

***Kielantherium cuii*=1; *Jeholotherium antiquum*=2; *Liaodelta antiqua=*2; *Cocotherium=*2; *Microtherulum=*2; *Acristatherium*=2**

157. Lingual base of paracone and metacone labially retracted: (0) Absent; (1) Present.

***Kielantherium cuii*=0; *Jeholotherium antiquum*=1; *Liaodelta antiqua=*0/1; *Cocotherium=*1; *Microtherulum=*1; *Acristatherium*=1**

158. Degree of labial shift of the lingual cusp (distance from the protocone apex to the lingual border vs. the total tooth width, in %) (applicable only to those taxa with reversed triangulation): (0) Protocone present but no labial shift (10%-20%); (1) Moderate labial shift (25%-30%); (2) Substantial labial shift (≥ 40%).

***Kielantherium cuii*=0; *Jeholotherium antiquum*=1; *Liaodelta antiqua=*0/1; *Cocotherium=*1; *Microtherulum=*1; *Acristatherium*=1**

159. Morphology of the protocone: (0) Initial and very small; (1) Protocone lingually extended but low; (2) Protocone high but apical portion anteroposteriorly compressed; (3) Apical portion expanded. {Original: Morphology of the lingual cusp (protocone) of upper molar (applicable only to those taxa with reversed triangulation and a lingual swelling of the upper molar): (0) Protoconal region present but no distinct protocone; (1) Protocone (or pseudo-protocone, cusp X) is proportionally small with a flat labial surface; (2) Protocone (or pseudo-protocone, cusp X) lingually extended; (3) Protocone apical portion anteroposteriorly compressed; (4) Apical portion slightly expanded; (5) Apical portion expanded.}

***Kielantherium cuii*=1; *Jeholotherium antiquum*=2; *Liaodelta antiqua=*3; *Cocotherium=*2; *Microtherulum=*2; *Acristatherium*=2**

160. Development of the pseudoprotocone: (0) Absent; (1) Present.

***Kielantherium cuii*=?; *Jeholotherium antiquum*=?; *Liaodelta antiqua=*?; *Cocotherium=*?; *Microtherulum=*?; *Acristatherium=*?**

161. Morphology of pseudoprotocone (cusp X) of upper molar: (0) Small with a flat labial surface; (1) Lingually extended.

***Kielantherium cuii*=?; *Jeholotherium antiquum*=?; *Liaodelta antiqua=*?; *Cocotherium=*?; *Microtherulum=*?; *Acristatherium*=?**

162. Upper molar basin between the lingual cusp and labial cusps b (paracone and metacone) that receives cusp b (paraconid) in occlusion: (0) Absent: (1) Present.

***Kielantherium cuii*=0; *Jeholotherium antiquum*=0; *Liaodelta antiqua=*0; *Cocotherium=*0; *Microtherulum=*; *Acristatherium*=0**

163. Upper molars lingual cusp Y (for those with triangular tooth pattern): (0) Absent; (1) Present.

***Kielantherium cuii*=0; *Jeholotherium antiquum*=0; *Liaodelta antiqua=*0; *Cocotherium=*0; *Microtherulum=*0; *Acristatherium*=0**

164. Height of the protocone relative to the paracone and metacone (whichever is highest of the latter two): (0) Protocone initial very small; (1) Protocone markedly lower (less than 70%); (2) Protocone of intermediate height (70%~80%); (3) Protocone near the height of paracone and metacone (within 80%). {Original: Height of the lingual cusp of upper molar relative to the paracone and metacone (whichever is highest of the latter two): (0) Protocone markedly lower (less than 70%); (1) Protocone of intermediate height (70%~80%); (2) Protocone near the height of paracone and metacone (within 80%).}

***Kielantherium cuii*=0; *Jeholotherium antiquum*=1; *Liaodelta antiqua=*1; *Cocotherium=*1; *Microtherulum=*2; *Acristatherium*=1**

165. Height and size of the paracone (cusp A) and metacone (cusp C) (based on the upper second molar if available): (0) Paracone noticeably higher and larger at the base than metacone; (1) Paracone slightly larger than metacone; (2) Paracone and metacone of equal size or paracone lower than metacone.

***Kielantherium cuii*=1; *Jeholotherium antiquum*=1; *Liaodelta antiqua=*1; *Cocotherium=*1; *Microtherulum=*1; *Acristatherium*=1**

166. Metacone (cusp C) position relative to paracone: (0) Metacone labial to paracone; (1) Metacone about the same level as paracone; (2) Metacone lingual to paracone.

***Kielantherium cuii*=1; *Jeholotherium antiquum*=1; *Liaodelta antiqua=*1; *Cocotherium=*1; *Microtherulum=*1; *Acristatherium*=1**

167. Base of the paracone (cusp A) and metacone (cusp C) (based on the upper second molar if available, applicable only to triangulated molars): (0) Merged; (1) Separated.

***Kielantherium cuii*=0; *Jeholotherium antiquum*=0; *Liaodelta antiqua*=0; *Cocotherium=*0; *Microtherulum=*0; *Acristatherium*=0**

168. Centrocrista between the paracone and the metacone of the upper molars (applicable only to taxa with well-developed metacone and distinctive wear facets 3 and 4): (0) Straight; (1) V-shaped, with labially directed postparacrista and premetacrista.

***Kielantherium cuii*=0; *Jeholotherium antiquum*=0; *Liaodelta antiqua*=0; *Cocotherium=*0; *Microtherulum=*0; *Acristatherium*=0**

169. Anteroposterior width of the conular region (with or without conules) on the upper molars (applicable only to taxa with reversed triangulation and an occluding lingual portion of the upper molar; for the taxa with conules, this is measured between the paraconule and metaconule; for those taxa without conules, this is measured as the length of the tooth medial to the base of paracone; the upper second molar measured where possible): (0) Narrow (anteroposterior distance medial to the paracone and metacone less than 0.30 of total tooth length); (1) Moderate development (distance between position of conules = 0.31—0.50 of total tooth length); (2) Wide (distance between conules greater than 0.51 of total tooth length); (3) Expanded.

***Kielantherium cuii*=0; *Jeholotherium antiquum*=1; *Liaodelta antiqua=*0; *Cocotherium=*1; *Microtherulum=*1; *Acristatherium*=1**

170. Development of the preprotocrista: (0) As a cingulum; (1) As a distinct crest.

***Kielantherium cuii*=0; *Jeholotherium antiquum*=1; *Liaodelta antiqua=?; Cocotherium=*1; *Microtherulum=*1; *Acristatherium*=1**

171. Development of the postprotocrista: (0) As a cingulum; (1) As a distinct crest.

***Kielantherium cuii*=0; *Jeholotherium antiquum*=1; *Liaodelta antiqua=?; Cocotherium=*1; *Microtherulum=*1; *Acristatherium*=1**

172. Presence of the paraconule on the upper molars: (0) Absent; (1) Present. {Original: Presence of the paraconule and metaconule on the upper molars: (0) Absent; (1) Present.}

***Kielantherium cuii*=0; *Jeholotherium antiquum*=1; *Liaodelta antiqua=*0; *Cocotherium=*1; *Microtherulum=*1; *Acristatherium*=1**

173. Relative position of the paraconule on upper molars: (0) Closer to the protocone; (1) Near the midpoint of the protocone-paracone;(2) Labial to the midpoint close to the paracone.{Original: Relative position of the paraconule and metaconule on the upper first and second molars: (0) Paraconule and metaconule closer to the protocone; (1) Both positioned near the midpoint of the protocone-metacone;(2) Paraconule and metaconule labial to the midpoint.}

***Kielantherium cuii*=?; *Jeholotherium antiquum*=0; *Liaodelta antiqua=*?; *Cocotherium=*0; *Microtherulum=*0; *Acristatherium*=0**

174. Presence of the metaconule on the upper molars: (0) Absent; (1) Present.

***Kielantherium cuii*=0; *Jeholotherium antiquum*=1; *Liaodelta antiqua=*0; *Cocotherium=*1; *Microtherulum=*1; *Acristatherium*=1**

175. Relative position of the metaconule on upper molars: (0) Closer to the protocone; (1) Near the midpoint of the protocone-metacone; (2) Labial to the midpoint close to the metacone.

***Kielantherium cuii*=?; *Jeholotherium antiquum*=0; *Liaodelta antiqua=*?; *Cocotherium=*0; *Microtherulum=*0; *Acristatherium*=0**

176. Internal conular cristae (conular wing): (0) Cristae indistinctive or absent; (1) Cristae distinctive and wing-like. (M137)

***Kielantherium cuii*=?; *Jeholotherium antiquum*=0; *Liaodelta antiqua=*?; *Cocotherium=*0; *Microtherulum=*0; *Acristatherium*=0**

177. Parastylar groove (on upper second molar): (0) Weak or absent; (1) Moderately to well developed.

***Kielantherium cuii*=0/1; *Jeholotherium antiquum*=1; *Liaodelta antiqua=*0; *Cocotherium=*1; *Microtherulum=*1; *Acristatherium*=1**

178. Stylar cuspule A, the parastyle, on the upper molars: (0) Present (at least a swelling is present); (1) Absent.

***Kielantherium cuii*=0; *Jeholotherium antiquum*=0; *Liaodelta antiqua=*0; *Cocotherium=*0; *Microtherulum=*0; *Acristatherium*=0**

179. Preparastyle on the upper molar (applicable to molars with triangulation): (0) Absent; (1) Present.

***Kielantherium cuii*=1; *Jeholotherium antiquum*=1; *Liaodelta antiqua=*0; *Cocotherium=*1; *Microtherulum=*1; *Acristatherium*=1**

180. Stylar cuspule B (opposite the paracone) (based on the upper second molar if available): (0) Vestigial to absent; (1) Small but distinctive; (2) Subequal to the parastyle.

***Kielantherium cuii*=0; *Jeholotherium antiquum*=1; *Liaodelta antiqua=*1; *Cocotherium=*1; *Microtherulum=*2; *Acristatherium*=1**

181. Stylar cuspule C (mesostyle near the ectoflexus) on the upper molar: (0) Absent; (1) Present but small; (2) Large.

***Kielantherium cuii*=0; *Jeholotherium antiquum*=0/1; *Liaodelta antiqua*=0; *Cocotherium=*0; *Microtherulum=*0; *Acristatherium*=0**

182. Stylar cuspule D (opposite the metacone) on the upper molar: (0) Absent; (1) Present.

***Kielantherium cuii*=0; *Jeholotherium antiquum*=0; *Liaodelta antiqua=*0; *Cocotherium=*0; *Microtherulum=*1; *Acristatherium*=1**

183. Absence vs. presence and size of the stylar cuspule E (Bensley-Simpson designation; not the Crompton cusp E): (0) Absent or poorly developed; (1) Present, less developed than or subequal to stylar cuspule D; (2) Present and better developed than cuspule D.

***Kielantherium cuii*=0; *Jeholotherium antiquum*=0; *Liaodelta antiqua=*0*; Cocotherium=*0; *Microtherulum=*0; *Acristatherium*=0**

184. Position of the stylar cuspule E relative to cusp D or “D-position”: (0) E more lingual to D or “D-position”; (1) E distal to or at same level as D or “D-position”.

***Kielantherium cuii*=?; *Jeholotherium antiquum*=?; *Liaodelta antiqua=?; Cocotherium=*?; *Microtherulum=*0; *Acristatherium*=?**

185. Size of the metastylar lobe and parastylar lobe: (0) Metastylar lobe smaller than the parastylar lobe; (1) Metastylar lobe of similar size and labial extent to the parastylar lobe; (2) Metastylar lobe much larger than the parastylar lobe.

***Kielantherium cuii*=0; *Jeholotherium antiquum*=0; *Liaodelta antiqua=*1/2; *Cocotherium=*0; *Microtherulum=*0; *Acristatherium*=0**

186. Aspect ratio and outline of the upper first molar: (0) Laterally compressed; (1) Longer than transversely wide (oval-shaped or spindle shaped); (2) Transversely wider than long (triangular outline); (3) Equilateral triangular; (4) Rectangular or nearly so; (5) circular.

***Kielantherium cuii*=1/2; *Jeholotherium antiquum*=2; *Liaodelta antiqua=*2/3; *Cocotherium=*2; *Microtherulum=*2; *Acristatherium*=2**

187. Upper molar interlock: (0) Absent; (1) Present.

***Kielantherium cuii*=1; *Jeholotherium antiquum*=1; *Liaodelta antiqua=*1; *Cocotherium=*1; *Microtherulum=*1; *Acristatherium*=1**

188. Anterior molar(s) - types of upper molar interlock: (0) Notch interlock (with cingular cusps involved or without); (1) Tongue-in-groove interlock; (2) Parastylar lobe of a succeeding molar lumbricated with the metastylar region of a preceding molar.

***Kielantherium cuii*=2; *Jeholotherium antiquum*=2; *Liaodelta antiqua=*2 *Cocotherium=*2; *Microtherulum=*2; *Acristatherium*=2**

189. Posterior upper molar(s) - types of upper molar interlock: (0) Posterior end of preceding molar lumbricating anterolabial side of ultimate upper molar; (1) Parastylar lobe of a succeeding molar lumbricated with the metastylar region of a preceding molar; (2) Tongue-in-groove interlock.

***Kielantherium cuii*=?; *Jeholotherium antiquum*=1; *Liaodelta antiqua=*1; *Cocotherium=*1; *Microtherulum=*1; *Acristatherium*=1**

190. Postcanine tooth cusp size (for taxa with multi-cusp rows): (0) Cusps on all rows subequal; (1) Primary lingual cusps larger; (2) Primary labial cusps larger.

***Kielantherium cuii*=?; *Jeholotherium antiquum*=?; *Liaodelta antiqua=?; Cocotherium=*?; *Microtherulum=*?; *Acristatherium*=?**

191. Secondary ridge or cusp addition on the primary lingual side of the primary lingual row of M1: (0) Absent; (1) Ridge added; (2) Cusps added.

***Kielantherium cuii*=?; *Jeholotherium antiquum*=?; *Liaodelta antiqua=?; Cocotherium=*?; *Microtherulum=*?; *Acristatherium*=?**

192. Secondary ridge or cusp addition on the labial side of primary labial row of M2: (0) Absent; (1) Ridge; (2) Cusps.

***Kielantherium cuii*=?; *Jeholotherium antiquum*=?; *Liaodelta antiqua=?; Cocotherium=*?; *Microtherulum=*?; *Acristatherium*=?**

193. Fusuliform (“spindle-shaped”) valley on anterior upper molars: (0) Absent; (1) Present.

***Kielantherium cuii*=?; *Jeholotherium antiquum*=?; *Liaodelta antiqua=?; Cocotherium=*?; *Microtherulum=*?; *Acristatherium*=?**

194. Cusp size in the labial row of ultimate upper molar (for taxa with multi-cusp rows): (0) Subequal or A2 the largest; (1) Large at the mesial and distal ends but small or absent in between; (2) Gradually reduced in size mesially; (3) Cusps subequal height.

***Kielantherium cuii*=?; *Jeholotherium antiquum*=?; *Liaodelta antiqua=?; Cocotherium=*?; *Microtherulum=*?; *Acristatherium*=?**

195. M2 primary buccal cusp row aligns distally to the primary lingual row of M1: (0) Absent; (1) Present.

***Kielantherium cuii*=?; *Jeholotherium antiquum*=?; *Liaodelta antiqua=?; Cocotherium=*?; *Microtherulum=*?; *Acristatherium*=?**

196. Precise opposition of the upper and lower molars: (0) Absent; (1) Present (either one-to-one, or occluding at the opposite embrasure or talonid); (2) Present (one lower molar contacts sequentially more than one upper molar).

***Kielantherium cuii*=1; *Jeholotherium antiquum*=1; *Liaodelta antiqua=*1; *Cocotherium=*1; *Microtherulum=*1; *Acristatherium*=1**

197. Postcanine occlusion: (0) Lack consistent contact relationship; (1) bilateral, interdigitating occlusion between multiple cusps; (2) precise unilateral occlusion.

***Kielantherium cuii*=2; *Jeholotherium antiquum*=2; *Liaodelta antiqua=*?; *Cocotherium=*2; *Microtherulum=*2; *Acristatherium*=2**

198. Relationships between the cusps of the opposing upper and lower molars: (0) Absent; (1) Present, lower primary cusp a occludes in the groove between upper cusps A, B; (2) Present, lower main cusp a occludes in front of the upper cusp B and into the embrasure between the opposite upper tooth and the preceding upper tooth; (3) Present, parts of the talonid occluding with the lingual face (or any part) of the upper molar; (4) Lower multicuspate rows alternately occluding between the upper multicuspate rows; (5) Columnar tooth without cusps and with beveled wear across the entire crown contact surface; (6) primary cusp of lower tooth contacts distolingual ridge on upper tooth, then slides through mesiolingual notch of succeeding tooth and into its basin.

***Kielantherium cuii*=3; *Jeholotherium antiquum*=3; *Liaodelta antiqua=*3; *Cocotherium=*3; *Microtherulum=*3; *Acristatherium*=3**

199. Lower and upper molar occlusion (for those with multicuspate rows): (0) Two (lower)-to-two (upper) cusp rows; (1) Two-to-three cusp rows.

***Kielantherium cuii*=?; *Jeholotherium antiquum*=?; *Liaodelta antiqua=?; Cocotherium=*?; *Microtherulum=*?; *Acristatherium*=?**

200. Development of upper molar row-Ax (for taxa with multiple cusp rows): (0) Absent; (1) Present.

***Kielantherium cuii*=?; *Jeholotherium antiquum*=?; *Liaodelta antiqua=?; Cocotherium=*?; *Microtherulum=*?; *Acristatherium*=?**

201. Development extra cusps labial to row-A of M1 (for taxa with multiple cusp rows): (0) Absent; (1) Present.

***Kielantherium cuii*=?; *Jeholotherium antiquum*=?; *Liaodelta antiqua=?; Cocotherium=*?; *Microtherulum=*?; *Acristatherium*=?**

202. Upper molar primary lingual cusp size variation (for taxa with multiple cusp rows): (0) Distal cusp (B1) the largest (cusps reduced in size mesially); (1) Largest cusp at the middle of cusp row; (2) Coalescence of B cusps; (3) Cusps subequal.

***Kielantherium cuii*=?; *Jeholotherium antiquum*=?; *Liaodelta antiqua=?; Cocotherium=*?; *Microtherulum=*?; *Acristatherium*=?**

203. Enamel ridges on upper molar(iform) cusps: (0) Absent or nearly so; (1) Present.

***Kielantherium cuii*=0; *Jeholotherium antiquum*=0; *Liaodelta antiqua*=0; *Cocotherium=*0; *Microtherulum=*0; *Acristatherium*=0**

204. Upper molar primary central basin shape (for taxa with multiple cusp rows): (0) Narrow; (1) Broad and fusuliform.

***Kielantherium cuii*=?; *Jeholotherium antiquum*=?; *Liaodelta antiqua=?; Cocotherium=*?; *Microtherulum=*?; *Acristatherium*=?**

205. Development of secondary basin lingual to primary buccal cusp row of upper molar: (0) Absent; (1) Present.

***Kielantherium cuii*=?; *Jeholotherium antiquum*=?; *Liaodelta antiqua=?; Cocotherium=*?; *Microtherulum=*?; *Acristatherium*=?**

206. Upper postcanine teeth cusp formula (for tritylodontids): (0) 3–4-4; (1) 2–3-3; (2) 2–3-2; (3) 3–3-3; (4) 2–2-2.

***Kielantherium cuii*=?; *Jeholotherium antiquum*=?; *Liaodelta antiqua=?; Cocotherium=*?; *Microtherulum=*?; *Acristatherium*=?**

**Lower Molar**

207. Number of lower molariform postcanines (for those with premolar and molar differentiated): (0) Six or more; (1) Five; (2) Four; (3) Three; (4) Two or less.

***Kielantherium cuii*=2; *Jeholotherium antiquum*=3; *Liaodelta antiqua=?; Cocotherium=*3; *Microtherulum=*3; *Acristatherium*=3**

208. Total number of lower postcanine loci: (0) More than Eight; (1) Eight; (2) Seven; (3) Six; (4) Five; (5) Four; (6) Three or fewer. {Original: Total number of lower postcanine loci: (0) Eight or more; (1) Seven; (2) Six; (3) Five; (4) Four; (5) Three or fewer.}

***Kielantherium cuii*=1; *Jeholotherium antiquum*=1; *Liaodelta antiqua=?; Cocotherium*=1; *Microtherulum*=1; *Acristatherium*=1**

209. Number of lower molariforms (code for zatherians): (0) Four; (1) Three

***Kielantherium cuii*=0; *Jeholotherium antiquum*=1; *Liaodelta antiqua=*?; *Cocotherium*=1; *Microtherulum*=1; *Acristatherium*=1**

210. Development of two rows of cusps on lower molar(iform): (0) Absent; (1) Present.

***Kielantherium cuii*=?; *Jeholotherium antiquum*=?; *Liaodelta antiqua*=?; *Cocotherium=*?; *Microtherulum=*?; *Acristatherium***

211. Mesiolingual cusp (a1) shape tall and hook-like (for taxa with multiple cusp rows): (0) Absent; (1) Present.

***Kielantherium cuii*=?; *Jeholotherium antiquum*=?; *Liaodelta antiqua=*?; *Cocotherium=*?; *Microtherulum=*?; *Acristatherium*=?**

212. Lower m1 with multicuspate rows – lingual row occludes into the basin of upper molar: (0) Absent; (1) Present.

***Kielantherium cuii*=?; *Jeholotherium antiquum*=?; *Liaodelta antiqua=*?; *Cocotherium=*?; *Microtherulum=*?; *Acristatherium*=?**

213. Lower m2 with multicuspate rows – the lingual cusp row occlude into the basin of upper molar: (0) Absent; (1) Present.

***Kielantherium cuii*=?; *Jeholotherium antiquum*=?; *Liaodelta antiqua=*?; *Cocotherium=*?; *Microtherulum=*?; *Acristatherium*=?**

214. The distal end of central valley (lower molars with multi-rows of cusps): (0) Open; (1) Closed by the ridge; (2) Closed by cuspules.

***Kielantherium cuii*=?; *Jeholotherium antiquum*=?; *Liaodelta antiqua*=?; *Cocotherium=*?; *Microtherulum=*?; *Acristatherium*=?**

215. Cuspules or ridges of the central basin on lower molars: (0) Absent; (1) Present.

***Kielantherium cuii*=?; *Jeholotherium antiquum*=?; *Liaodelta antiqua=*?; *Cocotherium=*?; *Microtherulum=*?; *Acristatherium*=?**

216. Development of three distinct main cusps (a=protoconid, b=paraconid; c=metaconid) on lower molar(iform): (0) Absent; (1) Initial; (2) Present.

***Kielantherium cuii*=2; *Jeholotherium antiquum*=2; *Liaodelta antiqua*=?; *Cocotherium*=2; *Microtherulum=*2; *Acristatherium*=2**

217. Alignment of the main cusps (b=paraconid; a=protoconid; c=metaconid) of the anterior lower molar(s): (0) Single longitudinal row; (1) Cusp c lingually shifted; (2) Both cusps b and c lingually shifted to form reversed triangle–acute (≤90°); (3) Two longitudinal multicuspate rows.

***Kielantherium cuii*=2; *Jeholotherium antiquum*=2; *Liaodelta antiqua*=?; *Cocotherium*=2; *Microtherulum*=2; *Acristatherium*=2**

218. Triangulation of cusps in the posterior lower molars: (0) Absent; (1) Multi-row (primarily two rows) and multi-cuspate; (2) Cusp c lingually shifted; (3) Posterior molars slightly triangulated due to shift of both cusp b and c; (4) Posterior molars fully triangulated due to lingual shift of both cusp b and c.

***Kielantherium cuii*=4; *Jeholotherium antiquum*=4; *Liaodelta antiqua*=?; *Cocotherium=*4; *Microtherulum*=4; *Acristatherium*=4**

219. Fusiform (“spindle-shaped”) valley between lingual cusp row and labial cusp row on lower molar: (0) Absent; (1) Present.

***Kielantherium cuii*=?; *Jeholotherium antiquum*=?; *Liaodelta antiqua*=?; *Cocotherium=*?; *Microtherulum=*?; *Acristatherium*=?**

220. Lower m1 main lingual row cusp count: (0) Two; (1) Three or Four; (2) Five; (3) Six; (4) More than six.

***Kielantherium cuii*=?; *Jeholotherium antiquum*=?; *Liaodelta antiqua*=?; *Cocotherium=*?; *Microtherulum=*?; *Acristatherium*=?**

221. m1 (or one of the distal lower postcanines) cusps, total number (only applicable to taxa with multi-rowed postcanines) (0) 4 or fewer; (1) 5-8; (2) 9-12; (3) 13 or more.

***Kielantherium cuii*=?; *Jeholotherium antiquum*=?; *Liaodelta antiqua*=?; *Cocotherium=*?; *Microtherulum=*?; *Acristatherium*=?**

222. Molar (molariform) cusp shape: (0) Conical; (1) Pyramidal; (2) Symmetrically crescent (with distal face concave); (3) Asymmetrically crescent (with distal face concave); (4) Cusp strongly crested; (5) Conical cusp strongly inflated; (6) Cusp lost.

***Kielantherium cuii*=0; *Jeholotherium antiquum*=0; *Liaodelta antiqua*=?; *Cocotherium=*0; *Microtherulum=*0; *Acristatherium*=0**

223. m1-2, protoconid (cusp a), buccal curvature at base level relative to curvature of paraconid (cusp b) and metaconid (cusp c) cusps: (0) Protoconid with same degree of labial bulging; (1) Protoconid far more bulging than paraconid and metaconid.

***Kielantherium cuii*=1; *Jeholotherium antiquum*=1; *Liaodelta antiqua*=?; *Cocotherium=*1; *Microtherulum=*1; *Acristatherium*=1**

224. m1-2, metacristid (protocristid) crest between protoconid (cusp a) and metaconid (cusp c), orientation relative to long axis of lower molars: (0) Parallel to lower jaw axis; (1) oblique; (2) transverse.

***Kielantherium cuii*=1; *Jeholotherium antiquum*=2; *Liaodelta antiqua*=?; *Cocotherium*=2; *Microtherulum*=2; *Acristatherium*=2**

225. m1, main cusps of trigonid (b=paroconid; a=protoconid; c=metaconid) alignment (not applicable to taxa with multi-row cheek teeth): (0) Single longitudinal row; (1) Partial angle (due to cusp c shift and insertion of cusp g); (2) Obtuse angle (due to cusps b and c shift); (3) Acute angle (due to cusps b and c shift).

***Kielantherium cuii*=3; *Jeholotherium antiquum*=3; *Liaodelta antiqua*=?; *Cocotherium=*3; *Microtherulum*=3; *Acristatherium*=3**

226. Protoconid (cusp a) and metaconid (cusp c) height ratio (on the lower second molar): (0) Protoconid distinctively higher; (1) Protoconid and metaconid nearly equal in height.

***Kielantherium cuii*=0; *Jeholotherium antiquum*=0; *Liaodelta antiqua*=?; *Cocotherium=*0; *Microtherulum=*0; *Acristatherium*=0**

227. m1-2 paraconid (cusp b) (not applicable to taxa with multi-row cheek teeth): (0) Present; (1) Absent.

***Kielantherium cuii*=0; *Jeholotherium antiquum*=0; *Liaodelta antiqua*=?; *Cocotherium=*0; *Microtherulum=*0; *Acristatherium*=0**

228. m1-2 paraconid (cusp b) mesiolingual surface shape: (0) Rounded; (1) Forms keel.

***Kielantherium cuii*=0; *Jeholotherium antiquum*=0; *Liaodelta antiqua*=?; *Cocotherium=*0; *Microtherulum=*0; *Acristatherium*=0**

229. m1-2, paraconid (cusp b) proximity to metaconid (cusp c) bases: (0) No proximal approaching (triconodont); (1) Widely separated; (2) Bases approaching each other becoming confluent; (3) Cusps b and c separated by cusp g.

***Kielantherium cuii*=2; *Jeholotherium antiquum*=2; *Liaodelta antiqua*=?; *Cocotherium=*2; *Microtherulum=*2; *Acristatherium*=2**

230. Relative height and size of the base of the paraconid (cusp b) and metaconid (cusp c) (on the lower second molar): (0) Paraconid distinctively higher than the metaconid; (1) Paraconid and metaconid nearly equal in height; (2) Paraconid lower than metaconid; (3) Paraconid reduced or absent.

***Kielantherium cuii*=1; *Jeholotherium antiquum*=2; *Liaodelta antiqua*=?; *Cocotherium=*2; *Microtherulum=*2; *Acristatherium*=2**

231. Elevation of the cingulid base of the paraconid (cusp b) relative to the cingulid base of the metaconid (cusp c) on the lower molars: (0) Absent; (1) Present.

***Kielantherium cuii*=0; *Jeholotherium antiquum*=0; *Liaodelta antiqua*=?; *Cocotherium=*0; *Microtherulum=*0; *Acristatherium*=0**

232. Cristid obliqua size and orientation (applicable only to the molar with at least a hypoconid (=cups d) on the talonid or a distal cingulid cuspule): (0) Short (the ridge from cusp d) and join the distal metacristid (ridge from the metaconid); (1) Contact closest to the middle posterior of the metaconid; (2) Contact closest to the lowest point of the protocristid; (3) Present, contact closest to the middle posterior of the protoconid.

***Kielantherium cuii*=0; *Jeholotherium antiquum*=0; *Liaodelta antiqua=*?; *Cocotherium=*0; *Microtherulum=*1; *Acristatherium*=0**

233. Lower molar medial and longitudinal crest (=‘pre-entocristid’ or ‘pre-hypoconulid’) on the talonid heel (only applicable to taxa with talonid or at least a cusp d): (0) Talonid (or cusp d) has no medial and longitudinal crest; (1) Medial-most cristid (‘pre-entoconid cristid’) of the talonid in alignment with the metaconid or with the post-metacristid if the latter is present (the postmetacristid is defined as the posterior crest of metaconid that is parallel to the lingual border of the crown), but widely separated from the latter; (2) Medial-most cristid of the talonid is hypertrophied and in alignment with the postmetacristid and abuts the latter by a V-notch; (3) ‘Pre-entocristid’ crest is offset from the metaconid (and postmetacristid if present), and the ‘preentocristid’ extending anterolingually past the base of the metaconid.

***Kielantherium cuii*=1; *Jeholotherium antiquum*=1; *Liaodelta antiqua*=?; *Cocotherium=*1; *Microtherulum=*1; *Acristatherium*=1**

234. Lingual cingulid of the lower molars: (0) Absent or weak; (1) Distinctive; (2) Strongly developed, crenulated with cuspules; (3) Kuhneocone distinctive.

***Kielantherium cuii*=0; *Jeholotherium antiquum*=0; *Liaodelta antiqua*=?; *Cocotherium=*0; *Microtherulum=*0; *Acristatherium*=0**

235. Anterior internal (mesio-lingual) cingular cuspule (e) on the lower molars: (0) Present as an anterior cuspule but not at the cingulid level; (1) Present, at the cingulid level; (2) Present, positioned above the cingulid level; (3) hypertrophied cusp e = pseudo-hypoconulid; (4) Absent.

***Kielantherium cuii*=0; *Jeholotherium antiquum*=0; *Liaodelta antiqua*=?; *Cocotherium*=0; *Microtherulum*=0; *Acristatherium*=0**

236. Anterior and labial (mesio-buccal) cingular cuspule (f): (0) Absent; (1) Present;

***Kielantherium cuii*=1; *Jeholotherium antiquum*=1; *Liaodelta antiqua*=?; *Cocotherium*=1; *Microtherulum*=1; *Acristatherium*=1**

237. Mesial cingulid features above the gum along the base of cusp b and a: (0) Absent; (1) Weak and discontinuous, with individualized cuspules below cusp b (as individual cuspule e, f, or both, but e and f are not connected); (2) Present, in a continuous shelf below cusps b and a (paraconid and protoconid) with no relations to the latter two, without occlusal function.

***Kielantherium cuii*=0; *Jeholotherium antiquum*=?; *Liaodelta antiqua*=?; *Cocotherium*=?; *Microtherulum*=1; *Acristatherium*=?**

238. Crestid connecting main cusp a to lingual cingulid cusp g or the cusp g position: (0) Absent; (1) Present.

***Kielantherium cuii*=0; *Jeholotherium antiquum*=0; *Liaodelta antiqua*=?; *Cocotherium=*0; *Microtherulum=*0; *Acristatherium*=0**

239. Cingulid shelf wrapping around the anterolingual corner of the molar to extend to the lingual side of the trigonid below the paraconid: (0) Absent; (1) Present, without occlusal function to the upper molars.

***Kielantherium cuii*=0; *Jeholotherium antiquum*=0; *Liaodelta antiqua*=?; *Cocotherium*=0; *Microtherulum*=0; *Acristatherium*=0**

240. Postcingulid (distal transverse cingulid above the gum level) on the lower molars: (0) Absent; (1) Present, horizontal above the gum level.

***Kielantherium cuii*=0; *Jeholotherium antiquum*=0; *Liaodelta antiqua*=?; *Cocotherium*=0; *Microtherulum*=0; *Acristatherium*=0**

241. Lower molars interlocking: (0) Absent; (1) Present.

***Kielantherium cuii*=1; *Jeholotherium antiquum*=1; *Liaodelta antiqua*=?; *Cocotherium*=?; *Microtherulum*=?; *Acristatherium*=?**

242. Lower molars interlocking - types of interlocking mechanisms: (0) Posterior cingular cuspule d (or the base of the hypoconulid) of the preceding molar fits in between cingular cuspules e and f of the succeeding molar; (1) posterior cingular cuspule d fits between cingular cuspule e and cusp b of the succeeding molar; (2) posterior cingular cuspule d or cingulum of the preceding molar fits into an embayment or vertical groove of the anterior aspect of the succeeding molar (without any involvement of distinctive cingular cuspules in interlocking). (3) Anterior corner of succeeding lower molar overlapping posterior corner of preceding lower molar.

***Kielantherium cuii*=1; *Jeholotherium antiquum*=1; *Liaodelta antiqua*=?; *Cocotherium=*1; *Microtherulum=*1; *Acristatherium*=1**

243. Size ratio of the last three lower postcanines: (0) Ultimate molar is smaller than the penultimate molar (m1≥m2≥m3; or m2≥m3≥m4; or m3≥m4≥m5; or m4≥m5≥m6; or p4≥m1≥m2); (1) Penultimate molar is the largest of the molars (m1≤m2≤m3≥m4; or m1≤m2>m3); (2) Ultimate molar is larger than the penultimate molar (m1≤m2≤m3); (3) Equal size.

***Kielantherium cuii*=3; *Jeholotherium antiquum*=3; *Liaodelta antiqua*=?; *Cocotherium=*3; *Microtherulum=*3; *Acristatherium*=3**

244. Distal three lower cheek tooth length relative to the dentary: (0) Tooth length short relative to shallow dentary; (1) Tooth length long relative to shallow dentary; (2) Tooth length long relative to a deep dentary; (3) Tooth length short relative to the deep dentary.

***Kielantherium cuii*=1; *Jeholotherium antiquum*=1; *Liaodelta antiqua*=?; *Cocotherium=*1; *Microtherulum=*1; *Acristatherium*=1**

245. Paraconid (cusp b) position relative to the other cusps on the lower molars (based on the lower second molar): (0) Paraconid anterior to cusp protoconid; (1) Paraconid on trigonid in anterolingual position to protocnid; (2) Paraconid lingually positioned (within lingual 1/4 of the trigonid width); (3) Paraconid lingually positioned and appressed to the metaconid.

***Kielantherium cuii*=1; *Jeholotherium antiquum*=1; *Liaodelta antiqua*=?; *Cocotherium=*1; *Microtherulum=*1; *Acristatherium*=1**

246. Orientation of the paracristid (or the crest between cusps a and b) relative to the longitudinal axis of the molar: (0) Longitudinal orientation; (1) Oblique; (2) Nearly transverse. (M105, K431)

***Kielantherium cuii=1; Jeholotherium antiquum=1; Liaodelta antiqua=?; Cocotherium=*1; *Microtherulum=*1; *Acristatherium*=1**

247. Angle of the paracristid (b-a crest) and the protocristid (a-c crest) on the lower molar: (0) 180°; (1) >90°; (2) 90° ~ 50°; (3) < 35°.

***Kielantherium cuii*=1; *Jeholotherium antiquum*=2; *Liaodelta antiqua*=?; *Cocotherium=*2; *Microtherulum=*2; *Acristatherium*=2**

248. Mesiolingual vertical crest of the paraconid on the lower molars (applicable only to taxa with reversed triangulation of the molar cusps): (0) Rounded; (1) Forming a keel.

***Kielantherium cuii*=0; *Jeholotherium antiquum*=0; *Liaodelta antiqua*=?; *Cocotherium=*0; *Microtherulum=*0; *Acristatherium*=0**

249. Anteroposterior shortening at the base of the trigonid relative to the talonid (applicable only to taxa with a talonid heel with a distal cusp d; measured at the lingual base of the lower second molar trigonid where possible): (0) Trigonid long (extending over 3/4 of the tooth length); (1) Swelling on the side walls of the trigonid (taxa assigned to this character state have a trigonid length ratio 45%~50%; but their morphology is different from all other states in that their side walls are convex); (2) No shortening (trigonid 50-65% of tooth length); (3) Some shortening (the base of trigonid < 50% of tooth length); (4) Anteroposterior compression of trigonid (trigonid 40~45% of the tooth length).

***Kielantherium cuii*=2; *Jeholotherium antiquum*=2; *Liaodelta antiqua*=?; *Cocotherium=*2; *Microtherulum=*2; *Acristatherium*=2**

250. Molar (the lower second molar measured where possible) trigonid/talonid heel width ratio: (0) Narrow (talonid ≤40% of trigonid); (1) Wide (talonid is 40-70% of the trigonid in width); (2) Talonid is equal or wider than trigonid.

***Kielantherium cuii*=1; *Jeholotherium antiquum*=1; *Liaodelta antiqua*=?; *Cocotherium=*1; *Microtherulum=*1; *Acristatherium*=1**

251. Lower molar hypoflexid (concavity anterolabial to the hypoconid or cusp d): (0) Absent or shallow (all "triconodont-like" teeth are coded as "0" here as long as they have cuspule d); (1) Deep (40~50% of talonid width); (2) Very Deep (>65%).

***Kielantherium cuii*=1; *Jeholotherium antiquum*=1; *Liaodelta antiqua*=?; *Cocotherium=*1; *Microtherulum=*1; *Acristatherium*=1**

252 Lower molar talonid or the posterior heel: (0) Absent; (1) Present {This is split from the original ch. 230}

***Kielantherium cuii*=1; *Jeholotherium antiquum*=1; *Liaodelta antiqua*=?; *Cocotherium=*1; *Microtherulum=*1; *Acristatherium*=1**

253. Morphology of the talonid (or the posterior heel) of the molar: (0) Present, as an incipient heel, a cingulid, or cingular cuspule (d); (1) Present, as a transverse ‘V-shaped’ basin with two functional cusps; (2) Present, as an obtuse ‘V-shaped’ triangle; (3) Present as a basin (rimmed with 3 functional cusps with at least is a functional crest to define the medial rim of the basin if the entoconid is not already present) with wear occurs only crests but absent from the bottom of the basin; (4) As a functional basin (rimmed by 3 cusps) with wear occurs inside the basin; (5) As a heel dominated labially by cusp d. {original: 230. Morphology of the talonid (or the posterior heel) of the molar: (0) Absent; (1) Present, as an incipient heel, a cingulid, or cingular cuspule (d); (2) Present, as a transverse ‘V-shaped’ basin with two functional cusps; (3) Present, as an obtuse ‘V-shaped’ triangle; (4) Present as a basin (rimmed with 3 functional cusps with at least is a functional crest to define the medial rim of the basin if the entoconid is not already present) with wear occurs only crests but absent from the bottom of the basin; (5) As a functional basin (rimmed by 3 cusps) with wear occurs inside the basin; (6) As a heel dominated labially by cusp d.}

***Kielantherium cuii*=1; *Jeholotherium antiquum*=3; *Liaodelta antiqua*=?; *Cocotherium=*4; *Microtherulum=*4; *Acristatherium*=4**

254. Distal cingulid cusp d - hypoconid: (0) Present, distal to cusp c; (1) Present, elevated above the cingulid level, labially positioned; (2) Present with occlusal contact to the upper molar, elevated above the cingulid level, labially positioned.

***Kielantherium cuii*=1; *Jeholotherium antiquum*=1; *Liaodelta antiqua*=?; *Cocotherium=*1; *Microtherulum=*1; *Acristatherium*=1**

255. Hypoconulid development: (0) Absent; (1) Present.

***Kielantherium cuii*=1; *Jeholotherium antiquum*=1; *Liaodelta antiqua*=?; *Cocotherium=*1; *Microtherulum=*1; *Acristatherium*=1**

256. Hypoconulid position: (0) Posterior near the mid-point of the transverse talonid width; (1) Labially shifted; (2) Medially shifted. (Original: Hypoconulid: (0) Absent; (1) Present, and median (near the mid-point of the transverse talonid width); (2) Present and placed within the lingual 1/3 of the talonid basin.)

***Kielantherium cuii*=1; *Jeholotherium antiquum*=1; *Liaodelta antiqua*=?; *Cocotherium=*1; *Microtherulum=*1; *Acristatherium*=1**

257. Hypoconulid labial postcingulid (shelf) on the lower molars; non-homologous with the postcingulid coded elsewhere in this list because of the different relationship to the talonid cusps; applicable to taxa with identifiable hypoconid and hypoconulid only): (0) Absent; (1) Present as a crest descending mesiolabially from the apex of the hypoconulid to the base of the hypoconid.

***Kielantherium cuii*=0; *Jeholotherium antiquum*=0; *Liaodelta antiqua*=?; *Cocotherium=*0; *Microtherulum=*0; *Acristatherium*=0**

258. Lower m1-2, hypoconulid, mediolateral position on talonid (character only applicable to taxa with multicuspidate talonid developed): (0) Median position; (1) More lingual position; (2) More labial position.

***Kielantherium cuii*=0; *Jeholotherium antiquum*=2; *Liaodelta antiqua=*?; *Cocotherium=*0; *Microtherulum=*0; *Acristatherium*=0**

259. Lower m1-2, prehypoconulid, crest connecting metaconid with hypoconulid along lingual edge of tooth, presence absent (0); present (1).

***Kielantherium cuii*=0; *Jeholotherium antiquum*=0; *Liaodelta antiqua*=?; *Cocotherium=*0; *Microtherulum=*0; *Acristatherium*=0**

260. Development of the entoconid: (0) Absent; (1) Initial and variable; (2) Present.

***Kielantherium cuii*=0; *Jeholotherium antiquum*=2; *Liaodelta antiqua*=?; *Cocotherium=*2; *Microtherulum=*2; *Acristatherium*=2**

261. Entoconid position: (0) About equal distance to the hypoconulid as to the hypoconid; (1) Slight approximation to the hypoconulid; (2) Twinned with the hypoconulid. (Original: 238. Lower molar entoconid: (0) Absent; (1) Present, about equal distance to the hypoconulid as to the hypoconid; (2) Present, with slight approximation to the hypoconulid (distance between the hypoconulid and entoconid noticeably shorter than between the hypoconulid and hypoconid); (3) Present and twinned with the hypoconulid.)

***Kielantherium cuii*=?; *Jeholotherium antiquum*=0; *Liaodelta antiqua*=?; *Cocotherium=*0; *Microtherulum=*0; *Acristatherium*=0**

262. Height ratio of the medial side of the crown (apex of the hypoconid to the base of the labial crown) vs. the most lingual cusp on the talonid to the base of the labial crown (this character can be based either on the entoconid if the entoconid is present or the hypoconulid if the entoconid cannot be scored): (0) Entoconid absent on the talonid heel; (1) Entoconid lower than the hypoconid; (2) Entoconid near the height of the hypoconid; (3) Entoconid near the height of the hypoconid and linked to the hypoconid by a transverse crest.

***Kielantherium cuii*=0; *Jeholotherium antiquum*=1; *Liaodelta antiqua=*?; *Cocotherium=*1; *Microtherulum=*1; *Acristatherium*=1**

263. Alignment of the paraconid, metaconid, and entoconid on the lower molars (applicable only to taxa with triangulation of the trigonid cusps and the entoconid present on the talonid): (0) Cusps not aligned; (1) Cusps aligned.

***Kielantherium cuii*=?; *Jeholotherium antiquum*=0; *Liaodelta antiqua=*?; *Cocotherium=*0; *Microtherulum=*0; *Acristatherium*=0**

264. The length vs. width ratio of the functional talonid basin of the lower molars (in occlusal view, measured at the cingulid level, and based on the second molar): (0) Longer than wide (or narrows posteriorly); (1) Length equals width; (2) Wider than long.

***Kielantherium cuii*=0; *Jeholotherium antiquum*=0; *Liaodelta antiqua=*?; *Cocotherium=*0; *Microtherulum=*1; *Acristatherium*=0**

265. Elevation of the talonid (measured as the height of the hypoconid from the cingulid on the labial side of the crown) relative to the trigonid (measured as the height of protoconid from the cingulid) (applicable only to the teeth with reversed triangulation): (0) Hypoconid/protoconid height ratio less than 20% (hypoconid or cusp d is on the cingulid); (1) Hypoconid/protoconid height ratio between 25% and 35% (talonid cusp elevated above the cingulid level); (2) Hypoconid/protoconid height ratio between 40% and 60%; (3) Hypoconid/protoconid height ratio between >60% and 80%; (4) Equal height.

***Kielantherium cuii*=1; *Jeholotherium antiquum*=2; *Liaodelta antiqua*=?; *Cocotherium=*2; *Microtherulum=*2; *Acristatherium*=2**

266. Outline of the lower first molar crown (in crown view): (0) Laterally compressed; (1) Oblong with slight labial bulge; (2) Triangular or tear-drop shaped; (3) Rectangular (or rhomboidal); (4) circular.

***Kielantherium cuii*=1; *Jeholotherium antiquum*=1; *Liaodelta antiqua*=?; *Cocotherium=*1; *Microtherulum=*1; *Acristatherium*=1**

267. Outline of the lower second molar crown (in crown view): (0) Laterally compressed; (1) Oblong with slight labial bulge; (2) Triangular or tear-drop shaped; (3) Rectangular (or rhomboidal); (4) circular.

***Kielantherium cuii*=1; *Jeholotherium antiquum*=1; *Liaodelta antiqua*=?; *Cocotherium=*1; *Microtherulum=*1; *Acristatherium*=1**

268. U-shaped transverse ridge in the lower multi-rowed molars: (0) Absent; (1) Present, at second anterior cusp; (2) Present, at the anterior rim.

***Kielantherium cuii*=?; *Jeholotherium antiquum*=?; *Liaodelta antiqua*=?; *Cocotherium=*?; *Microtherulum=*?; *Acristatherium*=?**

269. Cusp ratio on lingual row of multi-rowed lower molar: (0) Cusps are of subequal height; (1) Mesial cusp on the lingual row the highest.

***Kielantherium cuii*=?; *Jeholotherium antiquum*=?; *Liaodelta antiqua*=?; *Cocotherium=*?; *Microtherulum=*?; *Acristatherium*=?**

270. Cusp ratio on buccal row of multi-rowed lower molar: (0) All cusps are of sub-equal height; (1) The middle cusps higher than the mesial and distal cusps; (2) Mesial cusp (b2) the highest.

***Kielantherium cuii*=?; *Jeholotherium antiquum*=?; *Liaodelta antiqua*=?; *Cocotherium=*?; *Microtherulum=*?; *Acristatherium*=?**

271. Enlarged and more centrally placed mesial cusp of lingual row on lower m1 (applicable only to molars with multi-rows of multiple cusps): (0) Absent; (1) Present and moderate; (2) Present and hypertrophic.

***Kielantherium cuii*=?; *Jeholotherium antiquum*=?; *Liaodelta antiqua*=?; *Cocotherium=*?; *Microtherulum=*?; *Acristatherium*=?**

272. Complete middle valley between lingual cusp row and labial cusp row on lower m2 (runs from mesial end to the distal end): (0) Absent; (1) Present.

***Kielantherium cuii*=?; *Jeholotherium antiquum*=?; *Liaodelta antiqua*=?; *Cocotherium=*?; *Microtherulum=*?; *Acristatherium*=?**

273. Multi-rowed ultimate lower molar, row length difference: (0) Labial cusp row about equal as lingual cusp row; (1) Labial row is shorter at the anterior end (by at least half-cusp length) than lingual row; (2) Labial row is longer (more distally extended) at the posterior end than lingual row (by at least half-cusp length).

***Kielantherium cuii*=?; *Jeholotherium antiquum*=?; *Liaodelta antiqua*=?; *Cocotherium=*?; *Microtherulum=*?; *Acristatherium*=?**

274. Presence of b1 at the mesial end of the buccal cusp row of lower molar (for taxa with two cusp rows): (0) Present; (1) Absent.

***Kielantherium cuii*=?; *Jeholotherium antiquum*=?; *Liaodelta antiqua*=?; *Cocotherium=*?; *Microtherulum=*?; *Acristatherium*=?**

275. Cusp b (paraconid) occludes in the pseudotrigon between the protocone on the lingual side and paracone+metacone on the labial side: (0) Absent; (1) Present. (New)

***Kielantherium cuii*=0; *Jeholotherium antiquum*=0; *Liaodelta antiqua*=?; *Cocotherium=*0; *Microtherulum=*0; *Acristatherium*=0**

276. Cusp b (paraconid) occludes distal to the protocone of the preceding upper molar: (0)

Absent; (1) Present.

***Kielantherium cuii*=1; *Jeholotherium antiquum*=1; *Liaodelta antiqua*=?; *Cocotherium=*1; *Microtherulum=*1; *Acristatherium*=1**

277. Development of the pseudotalonid that is an expanded area lingual to cusp b: (0) Absent; (1) Present.

***Kielantherium cuii*=0; *Jeholotherium antiquum*=0; *Liaodelta antiqua*=?; *Cocotherium=*0; *Microtherulum=*0; *Acristatherium*=0**

278. Cusp g development: (0) Absent; (1) Present but relatively small; (2) As a main and functional cusp on the mesiolingual side of the lower molar.

***Kielantherium cuii*=0; *Jeholotherium antiquum*=0; *Liaodelta antiqua*=?; *Cocotherium=*0; *Microtherulum=*0; *Acristatherium*=0**

**Molar Wear Pattern**

279. Wear facets on the lingual side of lingual cusp row of m1 or buccal side of primary buccal cusp row of M1 (for those with multicusp rows and with molar-premolar differentiation): (0) Absent; (1) Present (for those that have two upper cusp rows); (2) Present on lingual side only due to development of the secondary lingual cusp row in M1.

***Kielantherium cuii*=?; *Jeholotherium antiquum*=?; *Liaodelta antiqua*=?; *Cocotherium=*?; *Microtherulum=*?; *Acristatherium*=?**

280. Wear facets on lingual side of lingual cusp row of m2 or on buccal side of primary buccal cusp row of M2 (for those with multicusp rows and with molar-premolar differentiation): (0) Absent; (1) Present for those that have two upper cusp rows.

***Kielantherium cuii*=?; *Jeholotherium antiquum*=?; *Liaodelta antiqua*=?; *Cocotherium=*?; *Microtherulum=*?; *Acristatherium*=?**

281. Wear facet distributions on primary buccal cusp row of M1 (for those with multicusp rows and with molar-premolar differentiation): (0) On buccal side of all buccal cusps; (1) On buccal side of A1, but not on the buccal side of the mesiobuccal cusp.

***Kielantherium cuii*=?; *Jeholotherium antiquum*=?; *Liaodelta antiqua*=?; *Cocotherium=*?; *Microtherulum=*?; *Acristatherium*=?**

282. Topographic relationships of wear facets to the main cusps: (0) Wear pattern across the entire crown; (1) Lower cusps a, c support two different wear facets (facets 1 and 4) that contact the upper primary cusp A; (2) Lower cusps a, c support a single wear facet (facet 4) that contacts the upper primary cusp B (this facet extends onto cusp A as wear continues, but 1 and 4 do not develop simultaneous in these taxa); (3) Multicuspate series (two upper rows to two lower rows), each cusp may support 2 wear facets; (4) Multicuspate series (three upper rows to two lower rows), each cusp may support 2 wear facets.

***Kielantherium cuii*=2; *Jeholotherium antiquum*=2; *Liaodelta antiqua*=?; *Cocotherium=*2; *Microtherulum=*2; *Acristatherium*=2**

283. Development and orientation of prevallum/postvallid shearing (based on either upper or the lower molar structures): (0) Absent; (1) Present and obtuse; (2) Present and transverse.

***Kielantherium cuii*=2; *Jeholotherium antiquum*=2; *Liaodelta antiqua*=2; *Cocotherium=*2; *Microtherulum=*2; *Acristatherium*=2**

284. Postvallum-prevallid shear emphasis: (0) Absent; (1) Present.

***Kielantherium cuii*=0; *Jeholotherium antiquum*=0; *Liaodelta antiqua=*1; *Cocotherium=*0; *Microtherulum=*0; *Acristatherium*=0**

285. Wear facet 1 (a single facet supported by cusp a and cusp c) and facet 2 (a single facet supported by cusp a and cusp b): (0) Absent; (1) Present.

***Kielantherium cuii*=1; *Jeholotherium antiquum*=1; *Liaodelta antiqua=*?; *Cocotherium=*1; *Microtherulum=*1; *Acristatherium*=1**

286. Upper molars - development of facet 1 and the preprotocrista (preparacrista): (0) Facet 1 (prevallum crest) short, not extending to the stylocone area; (1) Facet 1 extending into the hook-like area near the stylocone; (2) Preprotocrista long, extending labially beyond the paracone; (3) Facet 1 long and extending to the tip of the parastyle where there is no cingular cuspule.

***Kielantherium cuii*=1; *Jeholotherium antiquum*=2; *Liaodelta antiqua*=?; *Cocotherium=*?; *Microtherulum=*2; *Acristatherium*=2**

287. Differentiation of wear facet 3 and facet 4 (applicable to taxa with a distal cusp d or “hypoconulid”): (0) Absent; (1) Present; (2) Facets 3 and 4 hypertrophied on the flanks of the strongly V-shaped talonid.

***Kielantherium cuii*=1; *Jeholotherium antiquum*=1; *Liaodelta antiqua*=?; *Cocotherium=*1; *Microtherulum=*1; *Acristatherium*=1**

288. Hypoflexid wear (facet 3) ventral extension: (0) Deep; (1) Reduced.

***Kielantherium cuii*=0; *Jeholotherium antiquum*=1; *Liaodelta antiqua*=?; *Cocotherium=*1; *Microtherulum=*1; *Acristatherium*=1**

289. Orientation of facet 4 (on the posterior aspect of the hypoconid): (0) Present and oblique to the long axis of the tooth; (1) Present and forming a more transverse angle to the long axis of the tooth.

***Kielantherium cuii*=0; Jeholotherium antiquum=0; *Liaodelta antiqua*=?; *Cocotherium*=0; *Microtherulum*=0; *Acristatherium*=0**

290. Morphology of the posterolateral aspect of the talonid (the labial face of the hypoconid or equivalent area of Crompton facet 4, applicable to taxa with fully basined talonid): (0) Gently rounded; (1) Angular.

***Kielantherium cuii*=?; *Jeholotherium antiquum*=0; *Liaodelta antiqua*=?; *Cocotherium*=0; *Microtherulum*=0; *Acristatherium*=0**

291. Wear pattern within the talonid basin (applicable to those taxa with triangulated molars): (0) Absent; (1) Present; (2) Present apically on the crests of the talonid; (3) Apical wear on crest and lophodont.

***Kielantherium cuii*=1; *Jeholotherium antiquum*=1; *Liaodelta antiqua*=?; *Cocotherium=*1; *Microtherulum=*1; *Acristatherium*=1**

292. Development of the distal metacristid on lower molars (applicable only to taxa with reversed triangulation): (0) Present in all molars; (1) Present in ultimate molar; (2) Absent. {Original: Development of the distal metacristid on lower molars (applicable only to taxa with reversed triangulation): (0) Present; (1) Absent.}

***Kielantherium cuii*=0; *Jeholotherium antiquum*=0; *Liaodelta antiqua*=?; *Cocotherium=*0; *Microtherulum=*1; *Acristatherium*=0**

293. Differentiation of wear facets 5 and 6 on the labial face of the entoconid: (0) Absent; (1) Present.

***Kielantherium cuii*=?; *Jeholotherium antiquum*=0; *Liaodelta antiqua*=?; *Cocotherium=*1; *Microtherulum=*1; *Acristatherium*=1**

294. Surficial features on the occluding surfaces on the talonid (only applicable to taxa with reversed triangulation): (0) Smooth surface on the talonid heel (or on cusp d); (1) Multiple ridges within the talonid basin; (2) Talonid present, but wear occurs apically on the crests of cristidobliqua and hypoconidcristid (V-shaped talonid crests).

***Kielantherium cuii*=0; *Jeholotherium antiquum*=0; *Liaodelta antiqua*=?; *Cocotherium=*0; *Microtherulum=*0; *Acristatherium*=0**

295. Molar wear facets pseudo-3 and pseudo-4: (0) Absent; (1) Present.

***Kielantherium cuii*=0; *Jeholotherium antiquum*=0; *Liaodelta antiqua*=?; *Cocotherium=*0; *Microtherulum=*0; *Acristatherium*=0**

296. Molar wear facets pseudo-5 and pseudo-6: (0) Absent; (1) Present.

***Kielantherium cuii*=0; *Jeholotherium antiquum*=0; *Liaodelta antiqua*=?; *Cocotherium=*0; *Microtherulum=*0; *Acristatherium*=0**

297. Pseudo cusp e and f hypertrophied: (0) Absent; (1) Present.

***Kielantherium cuii*=0; *Jeholotherium antiquum*=0; *Liaodelta antiqua*=?; *Cocotherium=*0; *Microtherulum=*0; *Acristatherium*=0**

298. Mastication movement of lower jaw as inferred from tooth morphology and wear (for those with premolar-molar differentiation and precise tooth occlusion): (0) With transverse component of jaw movement; (1) With palinal component jaw movement.

***Kielantherium cuii*=0; *Jeholotherium antiquum*=0; *Liaodelta antiqua*=?; *Cocotherium=*0; *Microtherulum=*0; *Acristatherium*=0**

299. Palinal jaw movement pattern: (0) En echelon (step-like); (1) Primarily horizontal.

***Kielantherium cuii*=?; *Jeholotherium antiquum*=?; *Liaodelta antiqua=*?; *Cocotherium=*?; *Microtherulum=*?; *Acristatherium*=?**

**Other Dental Features**

300. Enamel microstructure: (0) Synapsida columnar enamel (prismless); (1) Initial development of prisms; (2) Full prismatic enamel; (3) Enamel absent.

***Kielantherium cuii*=?; *Jeholotherium antiquum*=?; *Liaodelta antiqua=*?; *Cocotherium=*?; *Microtherulum=*?; *Acristatherium*=?**

301. Hypsodonty roots of cheek teeth: (0) Absent; (1) Present.

***Kielantherium cuii*=0; *Jeholotherium antiquum*=0; *Liaodelta antiqua=*?; *Cocotherium=*0; *Microtherulum*=0; *Acristatherium*=0**

302. Upper postcanine tooth roots: (0) Single root; (1) Divided roots connected by dentine sheets; (2) Fully devided. {Original: 278. Upper postcanine roots: (0) Single root; (1) divided roots connected by dentine sheets; (2) two or three complete divided roots; **(**3) multiple roots coalesced; (4) more than three roots (divided into two longitudinal aligned roots).}

***Kielantherium cuii*=2; *Jeholotherium antiquum*=2; *Liaodelta antiqua=*2; *Cocotherium=*2; *Microtherulum=*2; *Acristatherium*=2**

303. Number of roots on the upper molars (except for the ultimate one):

**(0) Two; (1) Three; (2) More than three; (**3) multiple roots coalesced.

***Kielantherium cuii*=1; *Jeholotherium antiquum*=1; *Liaodelta antiqua=*1; *Cocotherium=*1; *Microtherulum=*1; *Acristatherium*=1**

304. Ultimate upper premolariform roots (code for cladotherians): (0) Two; (1) Three; (2) One

***Kielantherium cuii*=0; *Jeholotherium antiquum*=0; *Liaodelta antiqua=*0; *Cocotherium=*1; *Microtherulum=*1; *Acristatherium*=0**

305. Lingual root position on the upper molars: (0) Supporting the paracone; (1) Supporting the trigon; (2) Supporting the pseudotrigon.

***Kielantherium cuii*=1; *Jeholotherium antiquum*=1; *Liaodelta antiqua=*1; *Cocotherium=*1; *Microtherulum=*1; *Acristatherium*=1**

306. Lower postcanine roots: (0) Single; (1) Constricted root, with incipient longitudinal groove; (2) Divided; (3) roots coalesced.

***Kielantherium cuii*=2; *Jeholotherium antiquum*=2; *Liaodelta antiqua=?; Cocotherium=*2; *Microtherulum=*2; *Acristatherium=*2**

307. Lower postcanine roots curving distally: (0) Absent; (1) Present, with two roots curved; (2) Present, with one root; the distal root reduced.

***Kielantherium cuii*=0; *Jeholotherium antiquum*=0; *Liaodelta antiqua=*?; *Cocotherium*=0; *Microtherulum*=0; *Acristatherium*=0**

**POSTCRANIAL SKELETAL FEATURES**

308. Fusion of the atlas neural arch and intercentrum: (0) Absent; (1) Present.

***Kielantherium cuii*=?; *Jeholotherium antiquum*=1; *Liaodelta antiqua*=?; *Cocotherium=*?; *Microtherulum=*1; *Acristatherium*=?**

309. Cervical vertebrae atlas neural hemiarches: (0) Unfused; (1) Fused.

***Kielantherium cuii*=?; *Jeholotherium antiquum*=1; *Liaodelta antiqua=*?; *Cocotherium=*?; *Microtherulum=*1; *Acristatherium*=?**

310. Atlas rib: (0) Present; (1) Absent.

***Kielantherium cuii*=?; *Jeholotherium antiquum*=1; *Liaodelta antiqua=*?; *Cocotherium=*?; *Microtherulum=*1; *Acristatherium*=?**

311. Fusion of dens to the axis: (0) Absent; (1) Present.

***Kielantherium cuii*=?; *Jeholotherium antiquum*=1; *Liaodelta antiqua*=?; *Cocotherium=*?; *Microtherulum=*?; *Acristatherium*=?**

312. Axis rib: (0) Present; (1) Absent (rib fused to form the transverse process).

***Kielantherium cuii*=?; *Jeholotherium antiquum*=1; *Liaodelta antiqua*=?; *Cocotherium=*?; *Microtherulum=*1; *Acristatherium*=?**

313. Postaxial cervical ribs: (0) Unfused; (1) Fused.

***Kielantherium cuii*=?; *Jeholotherium antiquum*=?; *Liaodelta antiqua*=?; *Cocotherium=*?; *Microtherulum=*?; *Acristatherium*=?**

314. Number of vertebrae bearing ribs: (0) 13 or less; (1) 15 or more.

***Kielantherium cuii*=?; *Jeholotherium antiquum*=0; *Liaodelta antiqua=*?; *Cocotherium=*?; *Microtherulum=*0; *Acristatherium*=?**

315. Overlapping ventral costal plates: (0) Absent; (1) Present.

***Kielantherium cuii*=0; *Jeholotherium antiquum*=0; *Liaodelta antiqua*=?; *Cocotherium=*0; *Microtherulum=*0; *Acristatherium*=?**

316. Overlapping lumbar or posterior thoracic ribs: (0) Present; (1) Absent.

***Kielantherium cuii*=1; *Jeholotherium antiquum*=1; *Liaodelta antiqua=*?; *Cocotherium=*1; *Microtherulum=*1; *Acristatherium*=?**

317. Anticlinal vertebra: (0) Absent; (1) Present.

***Kielantherium cuii*=?; *Jeholotherium antiquum*=?; *Liaodelta antiqua=*?; *Cocotherium=*?; *Microtherulum=*?; *Acristatherium*=?**

318. Anticlinal vertebra position (not applicable for vertebral column without an anticlinal vertebra): (0) Anticlinal absent; (1) More posterior position (within last 4 lumbar vertebrae; (2) Anteriorly positioned (within the anterior 13 dorsal and the thoracic vertebral region).

***Kielantherium cuii*=?; *Jeholotherium antiquum*=?; *Liaodelta antiqua*=?; *Cocotherium=*?; *Microtherulum=*?; *Acristatherium*=?**

319. Mobile lumbar ribs: (0) Present; (1) Absent.

***Kielantherium cuii*=?; *Jeholotherium antiquum*=1; *Liaodelta antiqua=*?; *Cocotherium=*1; *Microtherulum=*1; *Acristatherium*=?**

320. Orientation of lumbar ribs or transverse processes: (0) Posterolaterally directed; (1) Laterally or anterolaterally directed.

***Kielantherium cuii*=?; *Jeholotherium antiquum*=?; *Liaodelta antiqua=*?; *Cocotherium=*?; *Microtherulum=*?; *Acristatherium*=?**

321. Xenarthrous articulation in addition to the pre- and post-zygapophyses of lumbar vertebrae: (0) Absent; (1) Present.

***Kielantherium cuii*=?; *Jeholotherium antiquum*=?; *Liaodelta antiqua*=?; *Cocotherium=*?; *Microtherulum=*?; *Acristatherium*=?**

**SHOULDER GIRDLE**

322. Interclavicle: (0) Present; (1) Absent.

***Kielantherium cuii*=?; *Jeholotherium antiquum*=0; *Liaodelta antiqua=*?; *Cocotherium=*?; *Microtherulum=*0; *Acristatherium*=?**

323. Interclavicle distal expansion: (0) Absent; (1) Present.

***Kielantherium cuii*=?; *Jeholotherium antiquum*=?; *Liaodelta antiqua=*?; *Cocotherium=*?; *Microtherulum=*?; *Acristatherium*=?**

324. Cranial margin of the interclavicle/manubrium (0) Emarginated or flat; (1) With a median process.

***Kielantherium cuii*=?; *Jeholotherium antiquum*=?; *Liaodelta antiqua*=?; *Cocotherium=*?; *Microtherulum=*?; *Acristatherium*=?**

325. Interclavicle to sternal manubrium length ratio: (0) Interclavicle twice the length of manubrium; (1) Interclavicle nearly equal to manubrium in length.

***Kielantherium cuii*=?; *Jeholotherium antiquum*=?; *Liaodelta antiqua=*?; *Cocotherium=*?; *Microtherulum=*?; *Acristatherium*=?**

326. Sternoclaviclular joint: (0) Immobile; (1) Mobile.

***Kielantherium cuii*=?; *Jeholotherium antiquum*=1; *Liaodelta antiqua=*?; *Cocotherium=*?; *Microtherulum=*1; *Acristatherium*=?**

327. Interclavico-manubrial craniolateral process: (0) Absent; (1) Present.

***Kielantherium cuii*=?; *Jeholotherium antiquum*=?; *Liaodelta antiqua=?; Cocotherium=*?; *Microtherulum=*?; *Acristatherium*=?**

328. Acromioclavicular joint: (0) Extensive articulation; (1) Limited articulation (either pointed acromion, pointed distal end of clavicle, or both).

***Kielantherium cuii*=?; *Jeholotherium antiquum*=?; *Liaodelta antiqua*=?; *Cocotherium=*?; *Microtherulum=*?; *Acristatherium*=?**

329. Curvature of the clavicle: (0) Boomerang-shaped; (1) Slightly curved.

***Kielantherium cuii*=1; *Jeholotherium antiquum*=1; *Liaodelta antiqua*=?; *Cocotherium=*1; *Microtherulum=*1; *Acristatherium*=?**

330. Scapula - supraspinous fossa: degree of development along the length: (0) Present only in the “acromional region” of the scapula, and on the cranial (dorsal) border of the scapula and positioned anterior to the glenoid); (1) Weakly developed (present only along a part of the scapula and positioned lateral to the glenoid); (2) Fully developed (present along the entire dorsal border of the scapula).

***Kielantherium cuii*=1; *Jeholotherium antiquum*=1; *Liaodelta antiqua*=?; *Cocotherium=*?; *Microtherulum=*?; *Acristatherium*=?**

331. Proportion of supraspinous vs. infraspinous fossae (width measured across the "saddle region" of the spine, or near the mid-length of the scapula): (0) Supraspinous “fossa” on the cranial aspect of the scapula and much narrower than infraspinous fossa; (1) Supraspinous width is 50% to 80% that of infraspinous fossa; (2) Fossae subequal; (3) Supraspinous over 150% that of infraspinous fossa.

***Kielantherium cuii*=0; *Jeholotherium antiquum*=1; *Liaodelta antiqua*=?; *Cocotherium=*?; *Microtherulum=*?; *Acristatherium*=?**

332. Scapula - acromion process: (0) Short stump, level with or behind the glenoid; (1) Hooklike and extending below the glenoid; (2) Distinct and blunt.

***Kielantherium cuii*=?; *Jeholotherium antiquum*=?; *Liaodelta antiqua=*?; *Cocotherium=*?; *Microtherulum=*?; *Acristatherium*=?**

333. Scapula - a distinctive fossa for the teres major muscle on the lateral aspect of the scapular plate: (0) Absent; (1) Present.

***Kielantherium cuii*=?; *Jeholotherium antiquum*=?; *Liaodelta antiqua=*?; *Cocotherium=*?; *Microtherulum=*?; *Acristatherium*=?**

334. Procoracoid: (0) Present; (1) Fused to the sternal apparatus.

***Kielantherium cuii*=?; *Jeholotherium antiquum*=?; *Liaodelta antiqua=*?; *Cocotherium=*?; *Microtherulum=*?; *Acristatherium*=?**

335. Procoracoid foramen: (0) Present; (1) Absent.

***Kielantherium cuii*=?; *Jeholotherium antiquum*=?; *Liaodelta antiqua=*?; *Cocotherium=*?; *Microtherulum=*?; *Acristatherium*=?**

336. Coracoid: (0) Large, with posterior process; (1) Small, without posterior process.

***Kielantherium cuii*=?; *Jeholotherium antiquum*=1; *Liaodelta antiqua=*?; *Cocotherium=*?; *Microtherulum=*?; *Acristatherium*=?**

337. Anterior process of the coracoid: (0) Indistinctive; (1) Distinctive; (2) Distinctive and forming a broad plate.

***Kielantherium cuii*=?; *Jeholotherium antiquum*=?; *Liaodelta antiqua=*?; *Cocotherium=*?; *Microtherulum=*?; *Acristatherium*=?**

338. Size of the anterior-most element (‘manubrium’) relative to the subsequent sternebrae in the sternal apparatus: (0) Large; (1) Small.

***Kielantherium cuii*=?; *Jeholotherium antiquum*=?; *Liaodelta antiqua=*?; *Cocotherium=*?; *Microtherulum=*?; *Acristatherium*=?**

339. Orientation (‘facing’ of the articular surface) of the glenoid (relative to the plane or the long axis of the scapula): (0) Nearly parallel and facing posterolaterally; (1) Oblique and facing more posteriorly; (2) Perpendicular.

***Kielantherium cuii*=2; *Jeholotherium antiquum*=2; *Liaodelta antiqua=*?; *Cocotherium=*2; *Microtherulum=*2; *Acristatherium*=?**

340. Shape and curvature of the glenoid: (0) Saddle-shaped, oval and elongate; (1) Uniformly concave and more rounded in outline.

***Kielantherium cuii*=?; *Jeholotherium antiquum*=?; *Liaodelta antiqua*=?; *Cocotherium=*?; *Microtherulum=*?; *Acristatherium*=?**

341. Medial surface of the scapula: (0) Convex; (1) Flat.

***Kielantherium cuii*=?; *Jeholotherium antiquum*=?; *Liaodelta antiqua*=?; *Cocotherium=*?; *Microtherulum=*?; *Acristatherium*=?**

342. Suprascapular incisure (defined as the prominent emargination on the cranial border of the supraspinous fossa): (0) Absent; (1) Present.

***Kielantherium cuii*=?; *Jeholotherium antiquum*=?; *Liaodelta antiqua*=?; *Cocotherium=*?; *Microtherulum=*?; *Acristatherium*=?**

**FORELIMB AND MANUS**

343. Humeral head: (0) Subspherical, weakly inflected; (1) Spherical, strongly inflected.

***Kielantherium cuii*=1; *Jeholotherium antiquum*=1; *Liaodelta antiqua*=?; *Cocotherium=*1; *Microtherulum=*?; *Acristatherium*=?**

344. Intertubercular groove of the humerus: (0) Shallow and broad; (1) Narrow and deep.

***Kielantherium cuii*=?; *Jeholotherium antiquum*=?; *Liaodelta antiqua=?; Cocotherium=*?; *Microtherulum=*?; *Acristatherium*=?**

345. Size of the lesser tubercle of the humerus relative to the greater tubercle: (0) Wider; (1) Narrower.

***Kielantherium cuii*=?; *Jeholotherium antiquum*=?; *Liaodelta antiqua*=?; *Cocotherium=*?; *Microtherulum=*?; *Acristatherium*=?**

346. Torsion between the proximal and distal ends of the humerus: (0) Strong (≥30°); (1) Moderate (30°–15°); (2) Weak.

***Kielantherium cuii*=2; *Jeholotherium antiquum*=2; *Liaodelta antiqua*=?; *Cocotherium=*?; *Microtherulum=*?; *Acristatherium*=?**

347. Ventral extension of the deltopectoral crest or the position of the deltoid tuberosity: (0) Short and limited to the proximal part of the humeral shaft; (1) Extending ventrally (distally) at least 1/3 the length of the shaft.

***Kielantherium cuii*=?; *Jeholotherium antiquum*=1; *Liaodelta antiqua*=?; *Cocotherium=*?; *Microtherulum=*?; *Acristatherium*=?**

348. Teres tuberosity on medial side of humerus: (0) Absent; (1) Present; (2) Hypertrophied.

***Kielantherium cuii*=?; *Jeholotherium antiquum*=?; *Liaodelta antiqua*=?; *Cocotherium=*?; *Microtherulum=*?; *Acristatherium*=?**

349. Ulnar articulation on the distal humerus: (0) Bulbous ulnar condyle; (1) Cylindrical trochlea in posterior view with a vestigial ulnar condyle in anterior view; (2) Cylindrical trochlea without an ulnar condyle (cylindrical trochlea extending to the anterior/ventral side).

***Kielantherium cuii*=?; *Jeholotherium antiquum*=?; *Liaodelta antiqua*=?; *Cocotherium=*?; *Microtherulum=*?; *Acristatherium*=?**

350. Radial articulation on the distal humerus: (0) Distinct and rounded radial condyle in both anterior (ventral) and posterior (dorsal) aspects (that does not form a continuous synovial surface with the ulnar articulation in the ventral/anterior view of the humerus); (1) Rounded radial condyle anteriorly but cylindrical posteriorly; (2) Capitulum (forming a continuous synovial surface with the ulnar trochlea; cylindrical in both anterior and posterior aspects).

***Kielantherium cuii*=?; *Jeholotherium antiquum*=?; *Liaodelta antiqua*=?; *Cocotherium=*?; *Microtherulum=*?; *Acristatherium*=?**

351. Entepicondyle and ectepicondyle of the humerus: (0) Robust; (1) Weak.

***Kielantherium cuii*=?; *Jeholotherium antiquum*=?; *Liaodelta antiqua*=?; *Cocotherium=*?; *Microtherulum=*?; *Acristatherium*=?**

352. Ectepicondylar foramen in humerus: (0) Present; (1) Absent.

***Kielantherium cuii*=?; *Jeholotherium antiquum*=1; *Liaodelta antiqua*=?; *Cocotherium=*?; *Microtherulum=*?; *Acristatherium*=?**

353. Sigmoidal shelf for the supinator ridge extending proximally from the ectepicondyle: (0) Absent;(1) Present.

***Kielantherium cuii*=?; *Jeholotherium antiquum*=?; *Liaodelta antiqua*=?; *Cocotherium=*?; *Microtherulum=*?; *Acristatherium*=?**

354. Humerus supratrochlear foramen: (0) Absent; (1) Present.

***Kielantherium cuii*=?; *Jeholotherium antiquum*=?; *Liaodelta antiqua*=?; *Cocotherium=*?; *Microtherulum=*?; *Acristatherium*=?**

355. Olecranon process of ulna: (0) Unossified or poorly ossified; (1) Well ossified.

***Kielantherium cuii*=1; *Jeholotherium antiquum*=1; *Liaodelta antiqua*=?; *Cocotherium=*1; *Microtherulum=*?; *Acristatherium*=?**

356. Ulna olecranon process, length relative to semilunar (=trochlear, sigmoid) notch: (0) Olecranon shorter than notch; (1) olecranon roughly equal to notch; (2) olecranon longer than notch.

***Kielantherium cuii*=?; *Jeholotherium antiquum*=0; *Liaodelta antiqua*=?; *Cocotherium=*1; *Microtherulum=*?; *Acristatherium*=?**

357. Ulna olecranon process posterior inflection: (0) Absent (0); (1) Present.

***Kielantherium cuii*=?; *Jeholotherium antiquum*=?; *Liaodelta antiqua*=?; *Cocotherium=*?; *Microtherulum=*?; *Acristatherium*=?**

358. Ulna styloid process: (0) Absent; (1) Present.

***Kielantherium cuii*=?; *Jeholotherium antiquum*=?; *Liaodelta antiqua*=?; *Cocotherium=*?; *Microtherulum=*?; *Acristatherium*=?**

359. Coronoid process of semilunar notch of ulna: (0) Absent; (1) Present and level to olecranon process; (2) Present and higher than olecranon process.

***Kielantherium cuii*=?; *Jeholotherium antiquum*=?; *Liaodelta antiqua*=?; *Cocotherium=*?; *Microtherulum=*?; *Acristatherium*=?**

360. Radius styloid process: (0) Absent; (1) Present.

***Kielantherium cuii*=?; *Jeholotherium antiquum*=?; *Liaodelta antiqua*=?; *Cocotherium=*?; *Microtherulum=*?; *Acristatherium*=?**

361. Styloid process of the radius: (0) Weak; (1) Strong.

***Kielantherium cuii*=?; *Jeholotherium antiquum*=?; *Liaodelta antiqua*=?; *Cocotherium=*?; *Microtherulum=*?; *Acristatherium*=?**

362. Enlargement of the scaphoid: (0) Not enlarged (scaphoid ≤150% of the lunate); (1) Enlarged (scaphoid twice the size of the lunate); (2) Enlarged with a distolateral process.

***Kielantherium cuii*=?; *Jeholotherium antiquum*=?; *Liaodelta antiqua*=?; *Cocotherium=*?; *Microtherulum=*?; *Acristatherium*=?**

363. Size and shape of the hamate (unciform): (0) About equal size to the triquetrum, anteroposteriorly compressed; (1) Hypertrophied, much larger than the triquetrum, mediolaterally compressed.

***Kielantherium cuii*=?; *Jeholotherium antiquum*=?; *Liaodelta antiqua*=?; *Cocotherium=*?; *Microtherulum=*?; *Acristatherium*=?**

364. Trapezium morphology and proportion: (0) Elongate to cuboidal, larger than or subequal to the trapezoid; (1) Bean-shaped or fusiform, smaller than the trapezoid.

***Kielantherium cuii*=?; *Jeholotherium antiquum*=?; *Liaodelta antiqua*=?; *Cocotherium=*?; *Microtherulum=*?; *Acristatherium*=?**

365. Triquetrum-lunate proportion: (0) Triquetrum nearly twice the size of the lunate; (1) Triquetrum subequal to the lunate.

***Kielantherium cuii*=?; *Jeholotherium antiquum*=?; *Liaodelta antiqua*=?; *Cocotherium=*?; *Microtherulum=*?; *Acristatherium*=?**

366. Relative length of metacarpals (MC) to proximal phalanx (PP) of digit III: (0) PP shorter than MC; (1) PP longer than MC.

***Kielantherium cuii*=?; *Jeholotherium antiquum*=0; *Liaodelta antiqua*=?; *Cocotherium=*?; *Microtherulum=*?; *Acristatherium*=?**

367. Number of phalanges present in manual digit III: (0) Four; (1) Three (1); (2) Two.

***Kielantherium cuii*=？; *Jeholotherium antiquum*=1; *Liaodelta antiqua*=?; *Cocotherium=*?; *Microtherulum=*?; *Acristatherium*=?**

368. Number of phalanges present in manual digit IV: (0) Four; (1) Three (1). (2) Two.

***Kielantherium cuii*=?; *Jeholotherium antiquum*=？; *Liaodelta antiqua*=?; *Cocotherium=*?; *Microtherulum=*?; *Acristatherium*=?**

**PELVIC GIRDLE**

369. Anterior process of the ilium: (0) Short (less than the diameter of the acetabulum); (1) Long, 1-1.5 times the diameter of the acetabulum; (2) Elongate, more than 1.5 times the diameter of the acetabulum.

***Kielantherium cuii*=?; *Jeholotherium antiquum*=2; *Liaodelta antiqua*=?; *Cocotherium=*?; *Microtherulum=*2; *Acristatherium*=?**

370. Posterior process of the ilium: (0) Present; (1) Reduced or absent.

***Kielantherium cuii*=?; *Jeholotherium antiquum*=?; *Liaodelta antiqua*=?; *Cocotherium=*?; *Microtherulum=*1; *Acristatherium*=?**

371. Acetabular dorsal emargination: (0) Open (emarginated); (1) Closed (with a complete rim).

***Kielantherium cuii*=?; *Jeholotherium antiquum*=?; *Liaodelta antiqua*=?; *Cocotherium=*?; *Microtherulum=*?; *Acristatherium*=?**

372. Sutures of the ilium, ischium, and pubis within the acetabulum: (0) Present; (1) Fused.

***Kielantherium cuii*=?; *Jeholotherium antiquum*=?; *Liaodelta antiqua=*?; *Cocotherium=*?; *Microtherulum=*1; *Acristatherium*=?**

373. Ischiatic dorsal margin and tuberosity: (0) Dorsal margin concave (emarginated) and ischiatic tuberosity present; (1) Dorsal margin concave and ischiatic tuberosity hypertrophied; (2) Dorsal margin straight and ischiatic tuberosity small; (3) Dorsal margin concave and ischiatic tuberosity curved.

***Kielantherium cuii*=?; *Jeholotherium antiquum*=?; *Liaodelta antiqua*=?; *Cocotherium=*?; *Microtherulum=*?; *Acristatherium*=?**

374. Posterior spine of the ischium: (0) Short and pointed; (1) expanded with oblique posterior spine; (2) expanded and truncated.

***Kielantherium cuii*=?; *Jeholotherium antiquum*=?; *Liaodelta antiqua*=?; *Cocotherium=*?; *Microtherulum=*2; *Acristatherium*=?**

375. Obturator foramen size: (0) Smaller or equal in size to acetabulum; (1) Intermediate, larger than acetabulum but less than twice size; (2) Large, more than twice size of acetabulum.

***Kielantherium cuii*=?; *Jeholotherium antiquum*=?; *Liaodelta antiqua*=?; *Cocotherium=*?; *Microtherulum=*?; *Acristatherium*=?**

376. Epipubic bone: (0) Present; (1) Absent.

***Kielantherium cuii*=?; *Jeholotherium antiquum*=?; *Liaodelta antiqua*=?; *Cocotherium=*?; *Microtherulum=*0; *Acristatherium*=?**

377. Width of epipubis: (0) Narrow; (1) wide.

***Kielantherium cuii*=?; *Jeholotherium antiquum*=?; *Liaodelta antiqua*=?; *Cocotherium=*?; *Microtherulum=*?; *Acristatherium*=?**

378. Fully encircled synovial surface inside the acetabulum: (0) Absent; (1) Present.

***Kielantherium cuii*=?; *Jeholotherium antiquum*=?; *Liaodelta antiqua*=?; *Cocotherium=*?; *Microtherulum=*?; *Acristatherium*=?**

379. Lesser psoas tuberosity or process on the pubis: (0) Absent; (1) Present.

***Kielantherium cuii*=?; *Jeholotherium antiquum*=?; *Liaodelta antiqua*=?; *Cocotherium=*?; *Microtherulum=*?; *Acristatherium*=?**

**HIND LIMB AND PES**

380. Inflected head of the femur set off from the shaft by a neck: (0) Neck absent and head oriented dorsally; (1) Neck present, head spherical and inflected medially.

***Kielantherium cuii*=1; *Jeholotherium antiquum*=1; *Liaodelta antiqua*=?; *Cocotherium=*?; *Microtherulum=*1; *Acristatherium*=?**

381. Femur neck degree of development: (0) Incipient and short; (1) Distinct and long.

***Kielantherium cuii*=?; *Jeholotherium antiquum*=0; *Liaodelta antiqua*=?; *Cocotherium=*?; *Microtherulum=*0; *Acristatherium*=?**

382. Fovea for the acetabular ligament on the femoral head: (0) Absent; (1) Present.

***Kielantherium cuii*=?; *Jeholotherium antiquum*=?; *Liaodelta antiqua*=?; *Cocotherium=*?; *Microtherulum=*?; *Acristatherium*=?**

383. Orientation of the greater trochanter: (0) Directed dorsolaterally; (1) directed dorsally.

***Kielantherium cuii*=?; *Jeholotherium antiquum*=0; *Liaodelta antiqua*=?; *Cocotherium=*?; *Microtherulum=*1; *Acristatherium*=?**

384. Greater trochanter of femur: (0) Continuous with femoral head; (1) Separated from femoral head by distinct notch.

***Kielantherium cuii*=?; *Jeholotherium antiquum*=1; *Liaodelta antiqua*=?; *Cocotherium=*?; *Microtherulum=*1; *Acristatherium*=?**

385. Level of greater trochanter relative to femoral head: (0) mid-level of femoral head; (1) top level of femoral head.

***Kielantherium cuii*=?; *Jeholotherium antiquum*=0; *Liaodelta antiqua*=0; *Cocotherium=*?; *Microtherulum=*0; *Acristatherium*=?**

386. Position of the lesser trochanter: (0) On medial side of the shaft; (1) On the ventromedial or ventral side of the shaft.

***Kielantherium cuii*=?; *Jeholotherium antiquum*=?; *Liaodelta antiqua=*1; *Cocotherium=*?; *Microtherulum=*?; *Acristatherium*=?**

387. Size of the lesser trochanter: (0) Large; (1) Small to absent.

***Kielantherium cuii*=?; *Jeholotherium antiquum*=?; *Liaodelta antiqua*=0/1; *Cocotherium=*?; *Microtherulum=*?; *Acristatherium*=?**

388. The third trochanter of femur: (0) Absent; (1) Present; (2) Present as a continuous ridge connected to the greater trochanter.

***Kielantherium cuii*=?; *Jeholotherium antiquum*=?; *Liaodelta antiqua*=?; *Cocotherium=*?; *Microtherulum=*?; *Acristatherium*=?**

389. Femur patellar groove presence: (0) Absent (0); (1) Present.

***Kielantherium cuii*=?; *Jeholotherium antiquum*=?; *Liaodelta antiqua*=?; *Cocotherium=*?; *Microtherulum=*?; *Acristatherium*=?**

390. Femur patellar groove mediolateral contour: (0) Flat; (1) Concave.

***Kielantherium cuii*=?; *Jeholotherium antiquum*=?; *Liaodelta antiqua*=?; *Cocotherium=*?; *Microtherulum=*?; *Acristatherium*=?**

391 Proximo-lateral tubercle or tuberosity of the tibia: (0) Large and hook-like; (1) Indistinct; (2) Fused to fibula.

***Kielantherium cuii*=1; *Jeholotherium antiquum*=1; *Liaodelta antiqua*=?; *Cocotherium=*?; *Microtherulum=*1; *Acristatherium*=?**

392. Distal tibial malleolus: (0) Weak; (1) Distinctive. (M290, K077)

***Kielantherium cuii*=0; *Jeholotherium antiquum*=0; *Liaodelta antiqua*=?; *Cocotherium=*?; *Microtherulum=*0; *Acristatherium*=?**

393. Differentiation of lateral tibio-astragalar condyle from the medial tibio-astragalar condyle: (0) Absent; (1) Present.

***Kielantherium cuii*=0; *Jeholotherium antiquum*=0; *Liaodelta antiqua*=?; *Cocotherium=*?; *Microtherulum=*1; *Acristatherium*=?**

394. Fibula contacting the distal end of the femur: (0) Present; (1) Absent; (2) Fibula contacting through fusion with the tibia.

***Kielantherium cuii*=0; *Jeholotherium antiquum*=0; *Liaodelta antiqua=*?; *Cocotherium=*?; *Microtherulum=*0; *Acristatherium*=?**

395. Fused distal portions of the tibia and fibula: (0) Absent; (1) Present.

***Kielantherium cuii*=0; *Jeholotherium antiquum*=0; *Liaodelta antiqua*=0; *Cocotherium=*0; *Microtherulum=*0; *Acristatherium*=?**

396. Enlarged parafibular structure of the fibula: (0) Absent; (1) Present; (2) Hypertrophied.

***Kielantherium cuii*=0; *Jeholotherium antiquum*=0; *Liaodelta antiqua*=0; *Cocotherium=*?; *Microtherulum=*0; *Acristatherium*=?**

397. Parafibula types: (0) Separate bone and unfused to the fibular; (1) fused to fibula as an enlarged process.

***Kielantherium cuii*=?; *Jeholotherium antiquum*=?; *Liaodelta antiqua*=?; *Cocotherium=*?; *Microtherulum=*?; *Acristatherium*=?**

398. Distal fibular styloid process: (0) Weak or absent; (1) Distinct.

***Kielantherium cuii*=0; *Jeholotherium antiquum*=0; *Liaodelta antiqua*=0; *Cocotherium=*?; *Microtherulum=*0; *Acristatherium*=?**

399. Fibula contacting the calcaneus: (0) Extensive contact; (1) Reduced; (2) Absent.

***Kielantherium cuii*=?; *Jeholotherium antiquum*=0; *Liaodelta antiqua=*1; *Cocotherium=*?; *Microtherulum=*1; *Acristatherium*=?**

400. Superposition (overlap) of the astragalus over the calcaneus (lower ankle joint): (0) Little or absent; (1) Weakly developed; (2) Present.

***Kielantherium cuii*=?; *Jeholotherium antiquum*=?; *Liaodelta antiqua*=?; *Cocotherium=*?; *Microtherulum=*?; *Acristatherium*=?**

401. Astragalo-navicular articulation – symmetry to the neck: (0) Articulating facet indistinctive; (1) Asymmetrical: present only on the lateral side of the “neck region”; (2) Symmetrical with regard to the astragalar neck.

***Kielantherium cuii*=?; *Jeholotherium antiquum*=?; *Liaodelta antiqua*=?; *Cocotherium=*?; *Microtherulum=*?; *Acristatherium*=?**

4.02 Astragalus neck development: (0) Absent; (1) Weakly developed.

***Kielantherium cuii*=?; *Jeholotherium antiquum*=?; *Liaodelta antiqua*=?; *Cocotherium=*?; *Microtherulum=*?; *Acristatherium*=?**

403. Astragalo-navicular contact aspect ratio: (0) Navicular contact transversely wider than

dorsoventrally thick; (1) Navicular contact dorsoventrally thicker than transversely wide.

***Kielantherium cuii*=?; *Jeholotherium antiquum*=?; *Liaodelta antiqua*=?; *Cocotherium=*?; *Microtherulum=*?; *Acristatherium*=?**

404. Expansion of navicular contact in the astragalar head region: (0) Restricted anteriorly; (1) Asymmetrical spread only to the medial side of the astragalar “head-neck region”; (2) Astragalar head supersedes navicular so the navicular facet shifted ventrally; (3) Symmetrical spread of the navicular facet to both the lateral and the medial sides of the neck (symmetrical with regards to the main axis of the neck).

***Kielantherium cuii*=?; *Jeholotherium antiquum*=?; *Liaodelta antiqua*=?; *Cocotherium=*?; *Microtherulum=*?; *Acristatherium*=?**

405. Astragalus, Astragalonavicular facet, shape flat or concave (0); convex (1); trochlea (2); crest-in-groove (3).

***Kielantherium cuii*=?; *Jeholotherium antiquum*=?; *Liaodelta antiqua*=?; *Cocotherium=*?; *Microtherulum=*?; *Acristatherium*=?**

406. Astragalus proximal trochlea: (0) Absent; (1) Present.

***Kielantherium cuii*=?; *Jeholotherium antiquum*=?; *Liaodelta antiqua*=?; *Cocotherium=*?; *Microtherulum=*?; *Acristatherium*=?**

407. Well-defined medio-tibial crest (more or less parallel to the tibio-fibular crest) on the astragalus: (0) Absent; (1) Present.

***Kielantherium cuii*=?; *Jeholotherium antiquum*=?; *Liaodelta antiqua*=?; *Cocotherium=*?; *Microtherulum=*?; *Acristatherium*=?**

408. Astragalar medial plantar tuberosity: (0) Absent; (1) Present, but weakly developed; (2) Present, and ventrally flaring or protruding. (M306)

***Kielantherium cuii*=?; *Jeholotherium antiquum*=?; *Liaodelta antiqua*=?; *Cocotherium=*?; *Microtherulum=*?; *Acristatherium*=?**

409. Distal end of the calcaneal tubercle: (0) Short, dorso-ventrally compressed, without a terminal swelling; (1) dorso-ventrally compressed, with a terminal swelling; (2) Elongate, vertically deep, and mediolaterally compressed, with terminal swelling.

***Kielantherium cuii*=?; *Jeholotherium antiquum*=?; *Liaodelta antiqua*=2; *Cocotherium=*?; *Microtherulum=*2; *Acristatherium*=?**

410. Morphology of the peroneal process of the calcaneus: (0) Laterally expanded shelf, larger than the combined length of the sustentacular and astragalar facets, lateral to the astragalar facet; (1) With a distinct and long peroneal process, laterally projecting; (2) With a distinct peroneal process, demarcated by a deep peroneal groove at the base; (3) Laterally directed, small peroneal shelf demarcated from the anterior (cuboidal) edge of the calcaneus; (4) Anterolaterally directed, hypertrophied peroneal process/shelf; (5) Peroneal structure laterally reduced (lateral surface is straight from the calcaneal tubercle).

***Kielantherium cuii*=?; *Jeholotherium antiquum*=?; *Liaodelta antiqua*=?; *Cocotherium=*?; *Microtherulum=*?; *Acristatherium*=?**

411. Placement of the base of the peroneal process relative to the level of the cuboid facet of the calcaneus: (0) Peroneal structure posterior to the level of the cuboid facet; (1) Peroneal structure developed anteriorly at the same level as the cuboid facet; (2) Peroneal structure hypertrophied, extending anteriorly beyond the level of the cuboid facet.

***Kielantherium cuii*=?; *Jeholotherium antiquum*=?; *Liaodelta antiqua=?; Cocotherium=*?; *Microtherulum=*?; *Acristatherium*=?**

412. Peroneal groove of the calcaneus: (0) Indistinct, on the anterolateral aspect of the lateral shelf; (1) Distinct, deep separation of the peroneal process; (2) Weakly developed, with shallow groove on the lateral side of the process.

***Kielantherium cuii*=?; *Jeholotherium antiquum*=?; *Liaodelta antiqua*=?; *Cocotherium=*?; *Microtherulum=*?; *Acristatherium*=?**

413. Alignment of the cuboid to the main axis of the calcaneus (horizontal plane): (0) On the anterior (distal) end of the calcaneus (the cuboid is aligned with the long axis of the calcaneus); (1) On the anteromedial aspect of the calcaneus (the cuboid is skewed to the medial side of the long axis of the calcaneus).

***Kielantherium cuii*=?; *Jeholotherium antiquum*=?; *Liaodelta antiqua*=?; *Cocotherium=*?; *Microtherulum=*?; *Acristatherium*=?**

414. Orientation of the calcaneocuboid joint in dorso-ventral plane: (0) Calcaneocuboid facet on the calcaneus oriented ventrally (more visible in the plantar view than in dorsal view); (1) Calcaneocuboid facet oriented anteriorly (distally); (2) Calcaneocuboid facet oriented ventromedially or medio-obliquely.

***Kielantherium cuii*=?; *Jeholotherium antiquum*=?; *Liaodelta antiqua*=?; *Cocotherium=*?; *Microtherulum=*?; *Acristatherium*=?**

415. Saddle-shaped calcaneocuboid joint: (0) Calcaneocuboid facet on the calcaneus relatively flat to slightly concave; (1) Saddle-shaped (differentiation of dorsal vs. proximal calcaneocuboid “facets” so that the whole calcaneocuboid joint is saddle-shaped).

***Kielantherium cuii*=?; *Jeholotherium antiquum*=?; *Liaodelta antiqua*=?; *Cocotherium=*?; *Microtherulum=*?; *Acristatherium*=?**

416. Lower ankle joint - orientation of the sustentacular facet of the calcaneus in relation to the horizontal plane: (0) Nearly vertical; (1) Oblique (≤70o) to nearly horizontal.

***Kielantherium cuii*=?; *Jeholotherium antiquum*=?; *Liaodelta antiqua*=?; *Cocotherium=*?; *Microtherulum=*?; *Acristatherium*=?**

417. Antero-posterior placement of the sustentacular facet relative to the astragalar facet on the calcaneus: (0) Directly anterior to the astragalar facet and vertically oriented on the medial edge of the calcaneus; (1) On the dorsal aspect and positioned anteromedial to the astragalar facet on the calcaneus; (2) On the dorsal aspect, medial to the astragalar facet; (3) On the dorsal aspect, anterior to the astragalar facet.

***Kielantherium cuii*=?; *Jeholotherium antiquum*=?; *Liaodelta antiqua*=?; *Cocotherium=*?; *Microtherulum=*?; *Acristatherium*=?**

418. Ventral outline of the sustentacular process of the calcaneus: (0) Indistinctive; (1) Medially directed shelf, with rounded outline; (2) Protruding triangle, posteromedially directed.

***Kielantherium cuii*=?; *Jeholotherium antiquum*=?; *Liaodelta antiqua*=?; *Cocotherium=*?; *Microtherulum=*?; *Acristatherium*=?**

419. Antero-posterior position of the sustentacular facet/process (using the most salient point of the facet/process in ventral view as landmark) relative to the length of the calcaneus: (0) Near the mid-point; (1) Near the anterior (proximal) one-third.

***Kielantherium cuii*=?; *Jeholotherium antiquum*=?; *Liaodelta antiqua*=?; *Cocotherium=*?; *Microtherulum=*?; *Acristatherium*=?**

420. Shape of posterior calcaneo-astragalar process/protuberance and its contiguous fibular contact (if the fibula contact is present in medial view) on the calcaneus: (0) Indistinctive (boundary not defined and confluent with fibular contact); (1) Well defined, and oblong to ellipsoidal; (2) Nearly spherical and bulbous, more transversely developed than character state 1; (3) Transversely confluent with the sustentacular facet.

***Kielantherium cuii*=?; *Jeholotherium antiquum*=?; *Liaodelta antiqua*=?; *Cocotherium=*?; *Microtherulum=*?; *Acristatherium*=?**

421. Placement of the CAF structure (structure of the calcaneoastragalar contact): (0) On the medial side of the body of the calcaneus; (1) On the dorsal side of the body of the calcaneus, but bordering on the body’s medial margin (without a protruding outline); (2) On the dorsal side of the body of the calcaneus and protruding beyond the body’s medial margin; (3) Withdrawn and separated from the medial margin and placed along the lateral margin of the body of the calcaneus.

***Kielantherium cuii*=?; *Jeholotherium antiquum*=?; *Liaodelta antiqua*=?; *Cocotherium=*?; *Microtherulum=*?; *Acristatherium*=?**

422. Anterior ventral (plantar) tubercle of the calcaneus: (0) Absent; (1) Present, at the anterior edge (just lateral to the cuboid facet); (2) Present, set back from the anterior edge.

***Kielantherium cuii*=?; *Jeholotherium antiquum*=?; *Liaodelta antiqua*=?; *Cocotherium=*?; *Microtherulum=*?; *Acristatherium*=?**

423. Anteroventral groove or depression of the calcaneus: (0) Absent; (1) Present.

***Kielantherium cuii*=?; *Jeholotherium antiquum*=?; *Liaodelta antiqua*=?; *Cocotherium=*?; *Microtherulum=*?; *Acristatherium*=?**

424. Cross-sectional shape of the body of the calcaneus at the level of the posterior calcaneoastragalar facet: (0) Dorso-ventrally compressed; (1) Mediolaterally compressed.

***Kielantherium cuii*=?; *Jeholotherium antiquum*=?; *Liaodelta antiqua*=?; *Cocotherium=*?; *Microtherulum=*?; *Acristatherium*=?**

425. Ventral curvature of the calcaneal tubercle: (0) Present; (1) Absent.

***Kielantherium cuii*=?; *Jeholotherium antiquum*=?; *Liaodelta antiqua*=?; *Cocotherium=*?; *Microtherulum=*?; *Acristatherium*=?**

426. Proportion of the navicular and cuboid (transverse width measured in dorsal view): (0) Navicular narrower than or subequal to cuboid; (1) Navicular wider than cuboid.

***Kielantherium cuii*=?; *Jeholotherium antiquum*=?; *Liaodelta antiqua*=?; *Cocotherium=*?; *Microtherulum=*1; *Acristatherium*=?**

427. Proportion of the entocuneiform, mesocuneiform, and ectocuneiform (in ventral view): (0) Mesocuneiform and ectocuneiform small, their combined width smaller than the width of the entocuneiform; (1) Mesocuneiform and ectocuneiform large, their combined width (in dorsal view) exceeding the width of the entocuneiform.

***Kielantherium cuii*=?; *Jeholotherium antiquum*=?; *Liaodelta antiqua*=?; *Cocotherium=*?; *Microtherulum=*0; *Acristatherium*=?**

428. Saddle-shaped contact between entocuneiform and proximal end of metatarsal 1: (0) Absent; (1) Present.

***Kielantherium cuii*=?; *Jeholotherium antiquum*=?; *Liaodelta antiqua*=?; *Cocotherium=*?; *Microtherulum=*0; *Acristatherium*=?**

429 Medio-plantar aspect of the cuboid deeply notched by the peroneus longus tendon: (0) Absent; (1) Present.

***Kielantherium cuii*=?; *Jeholotherium antiquum*=?; *Liaodelta antiqua*=?; *Cocotherium=*?; *Microtherulum=*0; *Acristatherium*=?**

430. Prehallux: (0) Absent; (1) Present.

***Kielantherium cuii*=?; *Jeholotherium antiquum*=0; *Liaodelta antiqua=*0; *Cocotherium=*?; *Microtherulum=*0; *Acristatherium*=?**

431. End-to-end contact of metatarsal V and the peroneal process of the calcaneus: (0) Absent; (1) Present.

***Kielantherium cuii*=?; *Jeholotherium antiquum*=?; *Liaodelta antiqua*=?; *Cocotherium=*?; *Microtherulum=*0; *Acristatherium*=?**

432. Relationships of the proximal end of metatarsal V to the cuboid: (0) Metatarsal V is off-set from the lateral side of the cuboid; (1) Metatarsal V is so far off-set to the side of the cuboid that it contacts the calcaneus; (2) Metatarsal V is level with (not offset from) the anterior end of the cuboid.

***Kielantherium cuii*=?; *Jeholotherium antiquum*=2; *Liaodelta antiqua*=?; *Cocotherium=*?; *Microtherulum=*2; *Acristatherium*=?**

433. Ventrolateral tubercle at the proximal end of metatarsal V: (0) Absent or indistinctive; (1) Present, at or anterior to the anterior edge of the calcaneus.

***Kielantherium cuii*=?; *Jeholotherium antiquum*=1; *Liaodelta antiqua*=?; *Cocotherium=*?; *Microtherulum=*1; *Acristatherium*=?**

434. Angle of metatarsal III to the calcaneus (which indicates how much the sole of the foot is ‘bent’ from the long axis of the ankle): (0) Metatarsal III aligned with (or parallel to) the long axis of the calcaneus; (1) Metatarsal III arranged obliquely from the long axis of the calcaneus.

***Kielantherium cuii*=?; *Jeholotherium antiquum*=0; *Liaodelta antiqua*=?; *Cocotherium=*?; *Microtherulum=*?; *Acristatherium*=?**

435. Metatarsal II and metatarsal III proximal ends: (0) II and III even or II more proximal than III; (1) III more proximal than II.

***Kielantherium cuii*=?; *Jeholotherium antiquum*=0; *Liaodelta antiqua*=?; *Cocotherium=*?; *Microtherulum=*?; *Acristatherium*=?**

436. Opposable hallux: (0) Absent; (1) Present.

***Kielantherium cuii*=?; *Jeholotherium antiquum*=0; *Liaodelta antiqua*=0; *Cocotherium=*?; *Microtherulum=*0; *Acristatherium*=?**

437. Relative length of metatarsals and proximal phalanx of digit III: (0) PP shorter than MT; (1) PP longer than MT.

***Kielantherium cuii*=?; *Jeholotherium antiquum*=0; *Liaodelta antiqua=*0; *Cocotherium=*?; *Microtherulum=*0; *Acristatherium*=?**

438. Ossified patella: (0) Absent; (1) Present.

***Kielantherium cuii*=?; *Jeholotherium antiquum*=0; *Liaodelta antiqua*=?; *Cocotherium=*?; *Microtherulum=*1; *Acristatherium*=?**

439. Sesamoid bones in pedal flexor tendons: (0) Absent; (1) Present.

***Kielantherium cuii*=?; *Jeholotherium antiquum*=?; *Liaodelta antiqua*=?; *Cocotherium=*?; *Microtherulum=*1; *Acristatherium*=?**

440. Sesamoid bones in pedal flexor tendons, pairing unpaired (0); paired (1).

***Kielantherium cuii*=?; *Jeholotherium antiquum*=?; *Liaodelta antiqua*=?; *Cocotherium=*?; *Microtherulum=*?; *Acristatherium*=?**

441. External pedal (tarsal) spur: (0) Absent; (1) Present.

***Kielantherium cuii*=?; *Jeholotherium antiquum*=0; *Liaodelta antiqua=*0; *Cocotherium=*?; *Microtherulum=*0; *Acristatherium*=?**

442. Epiphyses in long bones: (0) Absent; (1) Present.

***Kielantherium cuii*=1; *Jeholotherium antiquum*=1; *Liaodelta antiqua*=?; *Cocotherium=*?; *Microtherulum=*1; *Acristatherium*=?**

CRANIUM

443. External size of the cranial moiety of the squamosal: (0) Narrow; (1) Broad.

***Kielantherium cuii*=?; *Jeholotherium antiquum*=?; *Liaodelta antiqua=?; Cocotherium=*?; *Microtherulum=*?; *Acristatherium*=?**

444. Participation of the cranial moiety of the squamosal in the endocranial wall of the braincase: (0) Absent; (1) Present.

***Kielantherium cuii*=?; *Jeholotherium antiquum*=1; *Liaodelta antiqua=?; Cocotherium=*?; *Microtherulum=*?; *Acristatherium*=?**

445. Topographic relationships of the dentary-squamosal contact (or glenoid) and the cranial moiety of the squamosal (applicable to taxa with the dentary-squamosal joint): (0) Contact on the internal aspect of the zygoma, without a constricted neck; (1) Contact on the zygoma, with a constricted neck; (2) Contact on the cranial moiety of squama; (3) On zygoma, without a constricted neck.

***Kielantherium cuii*=?; *Jeholotherium antiquum*=?; *Liaodelta antiqua=*3; *Cocotherium=*?; *Microtherulum=*2; *Acristatherium*=3**

446. Squamosal glenoid fossa for dentary condyle: (0) Outline subcircular; (1) Oval, long axis anteroposterior, facing ventrally; (2) Oval, long axis mediolateral.

***Kielantherium cuii*=?; *Jeholotherium antiquum*=?; *Liaodelta antiqua=?; Cocotherium=*0; *Microtherulum=*?; *Acristatherium*=0**

447. Cross-section profile of the squamosal anterior to its zygomatic root: (0) Rounded or triangular and tapering anteriorly; (1) Dorsoventral expanded and mediolaterally compressed, and not tapering anteriorly.

***Kielantherium cuii*=?; *Jeholotherium antiquum*=?; *Liaodelta antiqua=?; Cocotherium=*0; *Microtherulum=*?; *Acristatherium*=0**

448. Postglenoid depression on the squamosal: (0) Present as the post-craniomandibular joint sulcus (“external auditory meatus” on the zygoma); (1) Absent; (2) Present on the skull base.

***Kielantherium cuii*=?; *Jeholotherium antiquum*=?; *Liaodelta antiqua=?; Cocotherium=*?; *Microtherulum=*?; *Acristatherium*=?**

449. Squamosal - entoglenoid process: (0) Absent or vestigial; (1) Present but separated from the postglenoid process; (2) Present, enlarged and connected to the postglenoid process.

***Kielantherium cuii*=?; *Jeholotherium antiquum*=?; *Liaodelta antiqua=?; Cocotherium=*?; *Microtherulum=*?; *Acristatherium*=?**

450. Position of the craniomandibular joint: (0) Posterior or lateral to the level of the fenestra vestibuli; (1) Anterior to the level of the fenestra vestibuli.

***Kielantherium cuii*=?; *Jeholotherium antiquum*=?; *Liaodelta antiqua=*1; *Cocotherium=*?; *Microtherulum=*?; *Acristatherium*=?**

451. Orientation of the glenoid on the squamosal: (0) On the inner side of the zygoma and facing ventromedially; (1) On the platform of the zygoma and facing ventrally.

***Kielantherium cuii*=?; *Jeholotherium antiquum*=?; *Liaodelta antiqua=*1; *Cocotherium=*?; *Microtherulum=*1; *Acristatherium*=?**

452. Postglenoid process of the squamosal: (0) Absent; (1) Postglenoid crest raised below the fossa, but without a distinctive process; (2) Distinctive process; (3) Distinctive process buttressed by ectotympanic.

***Kielantherium cuii*=?; *Jeholotherium antiquum*=?; *Liaodelta antiqua=*2; *Cocotherium=*2; *Microtherulum=*2; *Acristatherium*=2**

453. Postglenoid foramen position: (0) Posterior to the glenoid area; (1) Medial to the postglenoid process; (2) Anterior to the postglenoid process.

***Kielantherium cuii*=?; *Jeholotherium antiquum*=?; *Liaodelta antiqua=?; Cocotherium=*?; *Microtherulum=*?; *Acristatherium*=?**

454. Postglenoid foramen presence vs. absence and composition: (0) Absent; (1) Present, in the squamosal; (2) Present, between the squamosal and petrosal.

***Kielantherium cuii*=?; *Jeholotherium antiquum*=?; *Liaodelta antiqua=?; Cocotherium=*?; *Microtherulum=*?; *Acristatherium*=?**

455. Medial margin of the glenoid fossa: (0) Formed by the squamosal; (1) Formed by the alisphenoid.

***Kielantherium cuii*=?; *Jeholotherium antiquum*=?; *Liaodelta antiqua=?; Cocotherium=*?; *Microtherulum=*?; *Acristatherium*=?**

456. Squamosal - epitympanic recess: (0) No contribution to the “epitympanic area” of the petrosal; (1) Small contribution to the posterolateral wall of the epitympanic recess; (2) Large contribution to the lateral wall of the epitympanic recess; (3) Squamosal forming a large part of enlarged epitympanic sinus.

***Kielantherium cuii*=?; *Jeholotherium antiquum*=?; *Liaodelta antiqua=?; Cocotherium=*?; *Microtherulum=*?; *Acristatherium*=?**

457. Contribution of the basisphenoid wing (parasphenoid ala) to the external bony housing of the cochlea: (0) Participates in the rim of the fenestra vestibuli; (1) Does not reach the rim of the fenestra vestibuli; (2) Absent or excluded from the cochlear housing.

***Kielantherium cuii*=?; *Jeholotherium antiquum*=?; *Liaodelta antiqua=?; Cocotherium=*?; *Microtherulum=*?; *Acristatherium*=?**

458. Relationship of the cochlear housing to the lateral lappet of the basioccipital: (0) Entirely covered by the basioccipital; (1) Medial aspect covered by the basioccipital; (2) Partially (~about half width on the medial side) covered by the basioccipital; (3) Fully exposed as the promontorium.

***Kielantherium cuii*=?; *Jeholotherium antiquum*=3; *Liaodelta antiqua=*3; *Cocotherium=*?; *Microtherulum=*3; *Acristatherium*=?**

459. Internal carotid foramina in basisphenoid: (0) Present; (1) Absent.

***Kielantherium cuii*=?; *Jeholotherium antiquum*=?; *Liaodelta antiqua=?; Cocotherium=*?; *Microtherulum=*?; *Acristatherium*=?**

460. Prootic and opisthotic: (0) Separated; (1) Fused at early ontogenetic stage to form petrosal (=periotic).

***Kielantherium cuii*=?; *Jeholotherium antiquum*=?; *Liaodelta antiqua=?; Cocotherium=*?; *Microtherulum=*?; *Acristatherium*=?**

461. Thickened rim of the fenestra vestibuli: (0) Present; (1) Absent.

***Kielantherium cuii*=?; *Jeholotherium antiquum*=1; *Liaodelta antiqua*=1; *Cocotherium=*?; *Microtherulum=*1; *Acristatherium*=?**

462. Cochlear housing fully formed by the petrosal: (0) Absent; (1) Present.

***Kielantherium cuii*=?; *Jeholotherium antiquum*=1; *Liaodelta antiqua*=1; *Cocotherium=*?; *Microtherulum=*1; *Acristatherium*=?**

463. Ventromedial surface of the promontorium: (0) Flat; (1) Inflated and convex.

***Kielantherium cuii*=?; *Jeholotherium antiquum*=1; *Liaodelta antiqua*=1; *Cocotherium=*?; *Microtherulum=*1; *Acristatherium*=?**

464. Lateral wall and overall external outline of the promontorium: (0) Triangular, with a steep and slightly concave lateral wall; (1) Elongate and cylindrical; (2) Bulbous and oval shaped.

***Kielantherium cuii*=?; *Jeholotherium antiquum*=?; *Liaodelta antiqua*=2; *Cocotherium=*?; *Microtherulum=*2; *Acristatherium*=?**

465. Cochlea: (0) Cochlear recess (without a canal); (1) Short canal; (2) Elongate canal, to the fullest extent of the promontorium; (3) slightly curved; (4) Elongate and partly coiled; (5) Elongate and coiled to at least 360˚.

***Kielantherium cuii*=?; *Jeholotherium antiquum*=?; *Liaodelta antiqua*=?; *Cocotherium=*4; *Microtherulum=*?; *Acristatherium*=?**

466. Internal acoustic meatus - cribriform plate: (0) Absent; (1) Present.

***Kielantherium cuii*=?; *Jeholotherium antiquum*=?; *Liaodelta antiqua=?; Cocotherium=*?; *Microtherulum=*?; *Acristatherium*=?**

467. Internal acoustic meatus depth: (0) Deep with thick prefacial commissure; (1) Shallow with thin prefacial commissure.

***Kielantherium cuii*=?; *Jeholotherium antiquum*=?; *Liaodelta antiqua=?; Cocotherium=*?; *Microtherulum=*?; *Acristatherium*=?**

468. Primary bony lamina within the cochlear canal: (0) Absent; (1) Present.

***Kielantherium cuii*=?; *Jeholotherium antiquum*=?; *Liaodelta antiqua=?; Cocotherium=*?; *Microtherulum=*?; *Acristatherium*=?**

469. Secondary bony lamina for the basilar membrane within the cochlear canal: (0) Absent; (1) Present.

***Kielantherium cuii*=?; *Jeholotherium antiquum*=?; *Liaodelta antiqua=?; Cocotherium=*?; *Microtherulum=*?; *Acristatherium*=?**

470. Crista interfenestralis: (0) Horizontal, broad, and extending to the base of the paroccipital process; (1) Vertical, delimiting the back of the promontorium; (2) Horizontal, narrow, and connecting to the caudal tympanic process.

***Kielantherium cuii*=?; *Jeholotherium antiquum*=?; *Liaodelta antiqua=*1; *Cocotherium=*?; *Microtherulum=*2; *Acristatherium*=?**

471. Post-promontorial tympanic recess: (0) Absent; (1) Present.

***Kielantherium cuii*=?; *Jeholotherium antiquum*=?; *Liaodelta antiqua=?; Cocotherium=*?; *Microtherulum=*?; *Acristatherium*=?**

472. Rostral tympanic process of the petrosal: (0) Absent or low ridge; (1) Tall ridge but restricted to the posterior half of the promontorium.

***Kielantherium cuii*=?; *Jeholotherium antiquum*=?; *Liaodelta antiqua=?; Cocotherium=*?; *Microtherulum=*?; *Acristatherium*=?**

473. Caudal tympanic process of the petrosal: (0) Absent; (1) Present; (2) Present, notched; (3) Present, hypertrophied and buttressed against the exoccipital paracondylar process.

***Kielantherium cuii*=?; *Jeholotherium antiquum*=?; *Liaodelta antiqua=?; Cocotherium=*?; *Microtherulum=*?; *Acristatherium*=?**

474. Rear margin of the auditory region: (0) Marked by a steep wall; (1) Extended onto a flat surface.

***Kielantherium cuii*=?; *Jeholotherium antiquum*=?; *Liaodelta antiqua=?; Cocotherium=*?; *Microtherulum=*?; *Acristatherium*=?**

475. Prootic canal: (0) Absent; (1) Present, vertical; (2) Present, horizontal and reduced.

***Kielantherium cuii*=?; *Jeholotherium antiquum*=?; *Liaodelta antiqua=?; Cocotherium=*1; *Microtherulum=*?; *Acristatherium*=?**

476. Position of the sulcus for the anterior distributary of the transverse sinus relative to the subarcuate fossa: (0) Anterolateral; (1) Posterolateral.

***Kielantherium cuii*=?; *Jeholotherium antiquum*=?; *Liaodelta antiqua=?; Cocotherium=*?; *Microtherulum=*?; *Acristatherium*=?**

477. Lateral trough floor anterior to the tympanic aperture of the prootic canal and/or the primary facial foramen: (0) Open lateral trough, no bony floor; (1) Bony floor present; (2) Lateral trough absent.

***Kielantherium cuii*=?; *Jeholotherium antiquum*=?; *Liaodelta antiqua*=2; *Cocotherium=*1; *Microtherulum=*?; *Acristatherium*=?**

478. Anteroventral opening of the cavum epiptericum: (0) Present; (1) Present, with reduced size (due to the anterior expansion of the lateral trough floor; (2) Present, partially enclosed by the petrosal; (3) Present, enclosed by the alisphenoid and petrosal; (4) Present, as large piriform fenestra; (5) Absent.

***Kielantherium cuii*=?; *Jeholotherium antiquum*=?; *Liaodelta antiqua=?; Cocotherium=*?; *Microtherulum=*?; *Acristatherium*=?**

479. Enclosure of the geniculate ganglion by the bony floor of the petrosal in the cavum supracochleare: (0) Absent; (1) Present.

***Kielantherium cuii*=?; *Jeholotherium antiquum*=?; *Liaodelta antiqua*=1; *Cocotherium=*?; *Microtherulum=*?; *Acristatherium*=?**

480. Hiatus Fallopii: (0) Present, in the petrosal roof of the middle ear; (1) Present, at the anterior end of the petrosal; (2) Absent (applicable only to those taxa with a cavum supracochleare); (3) Endocranial.

***Kielantherium cuii*=?; *Jeholotherium antiquum*=?; *Liaodelta antiqua=?; Cocotherium=*?; *Microtherulum=*?; *Acristatherium*=?**

481. Foramen ovale - composition: (0) Between the petrosal and alisphenoid; (1) Secondary foramen partially or fully enclosed by the alisphenoid, in addition to the primary foramen between the petrosal and alisphenoid; (2) In the petrosal (anterior lamina); (3) Between the alisphenoid and squamosal; (4) Within the alisphenoid.

***Kielantherium cuii*=?; *Jeholotherium antiquum*=?; *Liaodelta antiqua=?; Cocotherium=*2; *Microtherulum=*?; *Acristatherium*=?**

482. Foramen ovale – position: (0) On the lateral wall of the braincase; (1) On the ventral surface of the skull.

***Kielantherium cuii*=?; *Jeholotherium antiquum*=?; *Liaodelta antiqua=?; Cocotherium=*?; *Microtherulum=*?; *Acristatherium*=?**

483. Number of exit(s) for the mandibular branch of the trigeminal nerve (V3): (0) One; (1) Two.

***Kielantherium cuii*=?; *Jeholotherium antiquum*=?; *Liaodelta antiqua=?; Cocotherium=*?; *Microtherulum=*?; *Acristatherium*=?**

484. Quadrate ramus of the alisphenoid: (0) Forming a rod underlying the anterior part of the lateral flange; (1) Absent; (2) Present, mostly laminar process in vicinity of foramen ovale.

***Kielantherium cuii*=?; *Jeholotherium antiquum*=?; *Liaodelta antiqua=?; Cocotherium=*?; *Microtherulum=*?; *Acristatherium*=?**

485. Alisphenoid canal (for the ramus inferior and/or ramus infraorbitalis): (0) Absent; (1) Present.

***Kielantherium cuii*=?; *Jeholotherium antiquum*=?; *Liaodelta antiqua=?; Cocotherium=*?; *Microtherulum=*?; *Acristatherium*=?**

486. Anterior lamina exposure on the lateral braincase wall: (0) Present; (1) Reduced or absent.

***Kielantherium cuii*=?; *Jeholotherium antiquum*=?; *Liaodelta antiqua=?; Cocotherium=*?; *Microtherulum=*?; *Acristatherium*=?**

487. Petrosal lateral flange, anterior part: (0) Present; (1) Absent or vestigial.

***Kielantherium cuii*=?; *Jeholotherium antiquum*=?; *Liaodelta antiqua=?; Cocotherium=*?; *Microtherulum=*?; *Acristatherium*=?**

488. Petrosal Lateral flange, anterior part orientation: (0): Horizontal shelf; (1) Ventrally directed; (2) Medially directed, contacting promontorium.

***Kielantherium cuii*=?; *Jeholotherium antiquum*=?; *Liaodelta antiqua=?; Cocotherium=*?; *Microtherulum=*?; *Acristatherium*=?**

489. Vertical component of the lateral flange (‘L-shaped’ and forming a vertical wall to the pterygoparoccipital foramen): (0) Present; (1) Absent.

***Kielantherium cuii*=?; *Jeholotherium antiquum*=?; *Liaodelta antiqua=?; Cocotherium=*?; *Microtherulum=*?; *Acristatherium*=?**

490. Vascular foramen in the posterior part of the lateral flange (and anterior to the pterygoparoccipital foramen): (0) Present; (1) Absent; (2) Lateral flange medially inflected.

***Kielantherium cuii*=?; *Jeholotherium antiquum*=?; *Liaodelta antiqua=?; Cocotherium=*?; *Microtherulum=*?; *Acristatherium*=?**

491. Relationship of the lateral flange to the crista parotica (or the anterior paroccipital process that bears the crista): (0) Widely separated; (1) Narrowly separated; (2) Continuous.

***Kielantherium cuii*=?; *Jeholotherium antiquum*=?; *Liaodelta antiqua=?; Cocotherium=*?; *Microtherulum=*?; *Acristatherium*=?**

492. Petrosal, pterygoparoccipital foramen (foramen for ramus superior of stapedial artery; tympanic opening of ventral ascending canal): (0) Present; (1) Absent.

***Kielantherium cuii*=?; *Jeholotherium antiquum*=?; *Liaodelta antiqua=?; Cocotherium=*?; *Microtherulum=*?; *Acristatherium*=?**

4963 Petrosal, pterygoparoccipital foramen, morphology laterally open notch (0); foramen enclosed by petrosal or squamosal or both (1).

***Kielantherium cuii*=?; *Jeholotherium antiquum*=?; *Liaodelta antiqua=?; Cocotherium=*?; *Microtherulum=*?; *Acristatherium*=?**

494. Position of the pterygoparoccipital foramen relative to the level of the fenestra vestibuli: (0) Posterior or lateral; (1) Anterior.

***Kielantherium cuii*=?; *Jeholotherium antiquum*=?; *Liaodelta antiqua=?; Cocotherium=*?; *Microtherulum=*?; *Acristatherium*=?**

495. Bifurcation of the paroccipital process: (0) Absent; (1) Present.

***Kielantherium cuii*=?; *Jeholotherium antiquum*=?; *Liaodelta antiqua=?; Cocotherium=*0; *Microtherulum=*?; *Acristatherium*=0**

496. Posterior paroccipital process of the petrosal: (0) No ventral projection below the level of the surrounding structures; (1) Projecting below the surrounding structures.

***Kielantherium cuii*=?; *Jeholotherium antiquum*=?; *Liaodelta antiqua=?; Cocotherium=*?; *Microtherulum=*?; *Acristatherium*=?**

497. Epitympanic recess lateral to the crista parotica: (0) Absent; (1) Present.

***Kielantherium cuii*=?; *Jeholotherium antiquum*=?; *Liaodelta antiqua=?; Cocotherium=*?; *Microtherulum=*?; *Acristatherium*=?**

498. Tympanohyal contact with the cochlear housing: (0) Absent; (1) Present.

***Kielantherium cuii*=?; *Jeholotherium antiquum*=?; *Liaodelta antiqua=?; Cocotherium=*?; *Microtherulum=*?; *Acristatherium*=?**

499. Relationship of the squamosal to the paroccipital process: (0) Squamosal covers the entire paroccipital region; (1) No squamosal cover on the anterior paroccipital region; (2) Squamosal covers a part of the paroccipital region, but not the crista parotica (the squamosal wall and the crista parotica are separated by the epitympanic recess).

***Kielantherium cuii*=?; *Jeholotherium antiquum*=?; *Liaodelta antiqua=?; Cocotherium=*?; *Microtherulum=*?; *Acristatherium*=?**

500. Medial process of the squamosal reaching toward the tympanic cavity: (0) Absent; (1) Present (near or bordering on the foramen ovale).

***Kielantherium cuii*=?; *Jeholotherium antiquum*=?; *Liaodelta antiqua=?; Cocotherium=*?; *Microtherulum=*?; *Acristatherium*=?**

501. Stapedial artery sulcus on the petrosal: (0) Absent; (1) Present.

***Kielantherium cuii*=?; *Jeholotherium antiquum*=?; *Liaodelta antiqua=?; Cocotherium=*1; *Microtherulum=*0; *Acristatherium*=?**

502. Transpromontorial sulcus for the internal carotid artery on the cochlear housing: (0) Absent; (1) Present.

***Kielantherium cuii*=?; *Jeholotherium antiquum*=?; *Liaodelta antiqua=?; Cocotherium=*0; *Microtherulum=*?; *Acristatherium*=?**

503. Deep groove on the anterior pole of the promontorium: (0) Absent; (1) Present.

***Kielantherium cuii*=?; *Jeholotherium antiquum*=?; *Liaodelta antiqua=?; Cocotherium=*0; *Microtherulum=*0; *Acristatherium*=0**

504. Perbullar canal or sulcus for the internal carotid artery: (0) Absent; (1) Present.

***Kielantherium cuii*=?; *Jeholotherium antiquum*=?; *Liaodelta antiqua=?; Cocotherium=*1; *Microtherulum=*?; *Acristatherium*=?**

505. Epitympanic wing medial to the promontorium: (0) Absent; (1) Present.

***Kielantherium cuii*=?; *Jeholotherium antiquum*=?; *Liaodelta antiqua=?; Cocotherium=*?; *Microtherulum=*?; *Acristatherium*=?**

506. Ectopterygoid process of the alisphenoid: (0) Absent; (1) Present.

***Kielantherium cuii*=?; *Jeholotherium antiquum*=?; *Liaodelta antiqua=?; Cocotherium=*?; *Microtherulum=*?; *Acristatherium*=?**

507. Tympanic process of the alisphenoid: (0) Absent; (1) Present but limited to the “piriform” region of the basicranium; (2) Intermediate.

***Kielantherium cuii*=?; *Jeholotherium antiquum*=?; *Liaodelta antiqua=?; Cocotherium=*?; *Microtherulum=*?; *Acristatherium*=?**

508. Hypotympanic recess in the junction of the alisphenoid, squamosal, and petrosal: (0) Absent; (1) Present.

***Kielantherium cuii*=?; *Jeholotherium antiquum*=?; *Liaodelta antiqua=?; Cocotherium=*?; *Microtherulum=*?; *Acristatherium*=?**

509. Separation of the fenestra cochleae from the jugular foramen: (0) Absent; (1) Separate but within the same depression; (2) Separate (not within the same depression).

***Kielantherium cuii*=?; *Jeholotherium antiquum*=?; *Liaodelta antiqua=?; Cocotherium=*?; *Microtherulum=*1; *Acristatherium*=?**

510. Channel of the perilymphatic duct: (0) Open channel and sulcus; (1) At least partially enclosed channel; (2) No indication.

***Kielantherium cuii*=?; *Jeholotherium antiquum*=?; *Liaodelta antiqua=?; Cocotherium=*?; *Microtherulum=*?; *Acristatherium*=?**

511. Jugular foramen size relative to the fenestra cochleae (applicable only to those taxa with a jugular foramen fully separated from the fenestra cochleae): (0) Jugular subequal to the fenestra cochleae; (1) Jugular larger than the fenestra cochleae.

***Kielantherium cuii*=?; *Jeholotherium antiquum*=?; *Liaodelta antiqua=?; Cocotherium=*0; *Microtherulum=*?; *Acristatherium*=?**

512. Relationship of the jugular foramen to the opening of the inferior petrosal sinus: (0) Confluent; (1) Separate.

***Kielantherium cuii*=?; *Jeholotherium antiquum*=?; *Liaodelta antiqua=?; Cocotherium=*1; *Microtherulum=*?; *Acristatherium*=?**

513. Stapedial muscle fossa size: (0) Absent; (1) Present, small; (2) Present, large (twice the size of the fenestra vestibuli).

***Kielantherium cuii*=?; *Jeholotherium antiquum*=?; *Liaodelta antiqua=?; Cocotherium=*?; *Microtherulum=*1; *Acristatherium*=?**

514. Alignment of the stapedial fossa relative to the crista interfenestralis: (0) Aligned with crista interfenestralis; (1) lateral to the crista interfenestralis.

***Kielantherium cuii*=?; *Jeholotherium antiquum*=?; *Liaodelta antiqua=?; Cocotherium=*?; *Microtherulum=*1; *Acristatherium*=?**

515. Hypoglossal foramen: (0) Indistinct, either confluent with the jugular foramen or sharing a depression with the jugular foramen; (1) Separated from the jugular foramen; (2) Separated from the jugular foramen; the latter has a circular, raised external rim.

***Kielantherium cuii*=?; *Jeholotherium antiquum*=1; *Liaodelta antiqua=?; Cocotherium=*?; *Microtherulum=*1; *Acristatherium*=?**

516. Number of separate hypoglossal foramina: (0) Single; (1) Double.

***Kielantherium cuii*=?; *Jeholotherium antiquum*=0; *Liaodelta antiqua=?; Cocotherium=*?; *Microtherulum=*1; *Acristatherium*=?**

MIDDLE EAR OSSICLE CHARACTERS

517. Geometry (shape) of the incudo-mallear contact: (0) Trochlear (convex and cylindrical) surface of the incus; (1) Trough; (2) Saddle-shaped contact on the incus; (3) Flat surface; (4) Convex but oval shurface (not cylindrical) on the incus.

***Kielantherium cuii*=?; *Jeholotherium antiquum*=2; *Liaodelta antiqua=?; Cocotherium=*?; *Microtherulum=*2; *Acristatherium*=?**

518. Alignment of the incus and the malleus: (0) Posterior-anterior; (1) Posteromedial to anterolateral; (2) Dorsoventral.

***Kielantherium cuii*=?; *Jeholotherium antiquum*=?; *Liaodelta antiqua=?; Cocotherium=*?; *Microtherulum=*1; *Acristatherium*=?**

519. Twisting of the dorsal plate relative to the trochlea on the quadrate: (0) Dorsal plate aligned with the trochlea; (1) Dorsal plate twisted relative to the trochlea; (2) Dorsal plate twisted and elevated from the trochlea; (3) Dorsal plate reduced to a conical process (crus breve).

***Kielantherium cuii*=?; *Jeholotherium antiquum*=3; *Liaodelta antiqua=?; Cocotherium=*?; *Microtherulum=*3; *Acristatherium*=?**

520. Presence of a quadrate/incus neck (slightly constricted region separating the dorsal plate or crus brevis from the trochlea; this represents the differentiation between the ‘body’ and crus brevis of the incus): (0) Absent; (1) Present.

***Kielantherium cuii*=?; *Jeholotherium antiquum*=?; *Liaodelta antiqua=?; Cocotherium=*?; *Microtherulum=*?; *Acristatherium*=?**

521. Dorsal plate (= crus brevis) of the quadrate/incus: (0) Broad plate; (1) Pointed triangle; (2) Reduced.

***Kielantherium cuii*=?; *Jeholotherium antiquum*=1; *Liaodelta antiqua=?; Cocotherium=*?; *Microtherulum=*1; *Acristatherium*=?**

522. Incus (quadrate), Crus longum (stapedial process): (0) Absent; (1) Present.

***Kielantherium cuii*=?; *Jeholotherium antiquum*=?; *Liaodelta antiqua=?; Cocotherium=*?; *Microtherulum=*?; *Acristatherium*=?**

523. Incus – angle of the crus brevis to crus longum of the incus (this is equivalent to the angle between the dorsal plate and the stapedial process of the quadrate): (0) Alignment of the stapedial process (crus longum) and the dorsal plate (crus brevis) (or an obtuse angle between the two structure) (distinctive process is lacking, stapes/incus contact is on the medial side of the quadrate trochlea); (1) Perpendicular or acute angle of the crus brevis and crus longum (“Ashaped” incus).

***Kielantherium cuii*=?; *Jeholotherium antiquum*=?; *Liaodelta antiqua=?; Cocotherium=*?; *Microtherulum=*1; *Acristatherium*=?**

524. Articulation of quadrate with stapes: (0) Stapedial contact restricted to medial end of trochlea; (1) Via projection from medial margin of dorsal plate; (2) Via medial vertical ridge on neck of quadrate; (3) Via projection from neck of quadrate; (4) Via stapedial process of incus.

***Kielantherium cuii*=?; *Jeholotherium antiquum*=?; *Liaodelta antiqua=?; Cocotherium=*?; *Microtherulum=*?; *Acristatherium*=?**

525. Primary suspension of the incus/quadrate on the basicranium: (0) By quadratojugal in addition to at least one other basicranial bone; (1) By squamosal only; (2) By petrosal (either by the preserved direct contact of the incus or by inference from the presence of a well-defined crista parotica).

***Kielantherium cuii*=?; *Jeholotherium antiquum*=?; *Liaodelta antiqua=?; Cocotherium=*?; *Microtherulum=*?; *Acristatherium*=?**

526. Quadratojugal: (0) Present; (1) Absent.

***Kielantherium cuii*=?; *Jeholotherium antiquum*=?; *Liaodelta antiqua=?; Cocotherium=*?; *Microtherulum=*1; *Acristatherium*=?**

527. Morphology of the stapes: (0) Columelliform–macroperforate; (1) Columelliform–imperforate (or microperforate); (2) Bicrurate–perforate; (3) Bicrurate–perforate with a large posterior process (or the process for insertion of the stapedius muscle [PISM]).

***Kielantherium cuii*=?; *Jeholotherium antiquum*=?; *Liaodelta antiqua=?; Cocotherium=*?; *Microtherulum=*2; *Acristatherium*=?**

528. Stapedial ratio: (0) Less than 1.4; (1) 1.4-1.8; (2) ≥1.8.

***Kielantherium cuii*=?; *Jeholotherium antiquum*=?; *Liaodelta antiqua=?; Cocotherium=*?; *Microtherulum=*2; *Acristatherium*=?**

529. Ratio of stapes length to skull length: (0) greater than 7.5%; (1) less than 5.5%.

***Kielantherium cuii*=?; *Jeholotherium antiquum*=?; *Liaodelta antiqua=?; Cocotherium=*?; *Microtherulum=*?; *Acristatherium*=?**

530. Process for insertion of the stapedius muscle: (0) Absent; (1) Present (or secondarily reduced).

***Kielantherium cuii*=?; *Jeholotherium antiquum*=?; *Liaodelta antiqua=?; Cocotherium=*?; *Microtherulum=*?; *Acristatherium*=?**

531. The process for insertion of the stapedius muscle: (0) Large (approaching the width or the stapes); (1) Small or reduced.

***Kielantherium cuii*=?; *Jeholotherium antiquum*=?; *Liaodelta antiqua=?; Cocotherium=*?; *Microtherulum=*?; *Acristatherium*=?**

532. Malleolar neck: (0) Absent; (1) Present.

***Kielantherium cuii*=?; *Jeholotherium antiquum*=?; *Liaodelta antiqua=?; Cocotherium=*?; *Microtherulum=*1; *Acristatherium*=?**

533. Malleus manubrium: (0) absent; (1) present.

***Kielantherium cuii*=?; *Jeholotherium antiquum*=?; *Liaodelta antiqua=?; Cocotherium=*?; *Microtherulum=*?; *Acristatherium*=?**

534. Distinctive angle or bending of Meckel’s bone (=anterior portion of postdentary rod) anterior to the level of ectotympanic (angular) bone: (0) Absent; (1) Present.

***Kielantherium cuii*=?; *Jeholotherium antiquum*=?; *Liaodelta antiqua=?; Cocotherium=*?; *Microtherulum=*?; *Acristatherium*=?**

535. Medio-lateral contact vs. separation of Meckel’s element (either independent or as an ossified component of the “postdentary rod”) from the posterior (pterygoid) region of mandible: (0) Presence of medio-lateral contact either in adult or in embryonic stage until Meckel’s cartilage re-absorption; (1) Embryonic Meckel’s cartilage medio-laterally separated from the posterior part of mandible; (2) Ossified Meckel’s cartilage medio-laterally separated from the posterior part of mandible.

***Kielantherium cuii*=?; *Jeholotherium antiquum*=?; *Liaodelta antiqua=?; Cocotherium=*?; *Microtherulum=*?; *Acristatherium*=?**

536. Ectotympanic size/shape: (0) Plate-like; (1) Curved and rod-like; (2) Ring-shaped; (3) Slightly expanded (fusiform); (4) Expanded; (5) Tube-like.

***Kielantherium cuii*=?; *Jeholotherium antiquum*=?; *Liaodelta antiqua=?; Cocotherium=*?; *Microtherulum=*3; *Acristatherium*=?**

537. Ectotympanic arc: (0) About 70 degrees: (1) ≤ 90 – 135 degrees; (2) ≥ 135 degrees.

***Kielantherium cuii*=?; *Jeholotherium antiquum*=?; *Liaodelta antiqua=?; Cocotherium=*?; *Microtherulum=*2; *Acristatherium*=?**

538. Anterior process of the ectotympanic (angular): (0) Present; (1) Absent.

***Kielantherium cuii*=?; *Jeholotherium antiquum*=?; *Liaodelta antiqua=?; Cocotherium=*?; *Microtherulum=*1; *Acristatherium*=?**

539. Position/orientation of the incisura tympanica: (0) Posteroventral; (1) Posterior; (2) Posterodorsal; (3) Dorsal.

***Kielantherium cuii*=?; *Jeholotherium antiquum*=?; *Liaodelta antiqua=?; Cocotherium=*?; *Microtherulum=*?; *Acristatherium*=?**

540. Entotympanic and its contribution to the bullar structure: (0) Absent; (1) Present.

***Kielantherium cuii*=?; *Jeholotherium antiquum*=?; *Liaodelta antiqua=?; Cocotherium=*?; *Microtherulum=*0; *Acristatherium*=?**

**OTHER CRANIAL CHARACTERS**

541. Interparietal (postparietal) in adult: (0) Separate bone; (1) Absent or fused with other bones.

***Kielantherium cuii*=?; *Jeholotherium antiquum*=?; *Liaodelta antiqua=?; Cocotherium=*?; *Microtherulum=*?; *Acristatherium*=?**

542. Prefrontal: present (0); absent (1).

***Kielantherium cuii*=?; *Jeholotherium antiquum*=?; *Liaodelta antiqua=?; Cocotherium=*?; *Microtherulum=*?; *Acristatherium*=?**

543. Postorbital bone: (0) Present; (1) Absent.

***Kielantherium cuii*=?; *Jeholotherium antiquum*=?; *Liaodelta antiqua=?; Cocotherium=*?; *Microtherulum=*?; *Acristatherium*=?**

544. Vomer exposure in incisive foramen (at anterior ends of maxillae on palate): (0) Present; (1) absent.

***Kielantherium cuii*=?; *Jeholotherium antiquum*=?; *Liaodelta antiqua=?; Cocotherium=*?; *Microtherulum=*?; *Acristatherium*=?**

545. Vomer vertical septum extension with vertical septum extending posteriorly beyond level of secondary palate: (0) Present; (1) Absent.

***Kielantherium cuii*=?; *Jeholotherium antiquum*=?; *Liaodelta antiqua=?; Cocotherium=*?; *Microtherulum=*?; *Acristatherium*=?**

546. Internal auditory meatus: (0) Open; (1) Walled.

***Kielantherium cuii*=?; *Jeholotherium antiquum*=?; *Liaodelta antiqua=?; Cocotherium=*?; *Microtherulum=*?; *Acristatherium*=?**

547. Posterior extent of the bony secondary palate: (0) Anterior to the posterior end of the tooth row; (1) Level with the posterior end of the tooth row; (2) Extending posterior to the tooth row; (3) Extending to the basisphenoid-basioccipital suture.

***Kielantherium cuii*=?; *Jeholotherium antiquum*=?; *Liaodelta antiqua=?; Cocotherium=*?; *Microtherulum=*?; *Acristatherium*=?**

548. Posterior median spine (or torus) on the palate: (0) Absent; (1) Present.

***Kielantherium cuii*=?; *Jeholotherium antiquum*=?; *Liaodelta antiqua=?; Cocotherium=*?; *Microtherulum=*?; *Acristatherium*=?**

549. Pterygopalatine ridges: (0) Present; (1) Absent.

***Kielantherium cuii*=?; *Jeholotherium antiquum*=?; *Liaodelta antiqua=?; Cocotherium=*?; *Microtherulum=*?; *Acristatherium*=?**

550. Transverse process of the pterygoid: (0) Present and massive; (1) Present but reduced (as the hamulus); (2) Greatly reduced (with a vestigial crest on pterygoid) or absent.

***Kielantherium cuii*=?; *Jeholotherium antiquum*=?; *Liaodelta antiqua=?; Cocotherium=*?; *Microtherulum=*?; *Acristatherium*=?**

551. Pterygoids contact on midline on pharyngeal roof: (0) Present; (1) Absent.

***Kielantherium cuii*=?; *Jeholotherium antiquum*=?; *Liaodelta antiqua=?; Cocotherium=*?; *Microtherulum=*?; *Acristatherium*=?**

552. Ventral opening of the minor palatine foramen: (0) Encircled by the pterygoid (and ectopterygoid if present) in addition to the palatine; (1) Encircled by the palatine and maxilla, separated widely from the subtemporal margin; (2) Encircled completely by the palatine (or between palatine and maxilla), large, with thin bony bridge from the subtemporal margin; (3) Large, posterior fenestration.

***Kielantherium cuii*=?; *Jeholotherium antiquum*=?; *Liaodelta antiqua=?; Cocotherium=*?; *Microtherulum=*?; *Acristatherium*=?**

553. Ectopterygoid bone: present (0); absent (1).

***Kielantherium cuii*=?; *Jeholotherium antiquum*=?; *Liaodelta antiqua=?; Cocotherium=*?; *Microtherulum=*?; *Acristatherium*=?**

554. Transverse canal foramen: (0) Absent; (1) Present.

***Kielantherium cuii*=?; *Jeholotherium antiquum*=?; *Liaodelta antiqua=?; Cocotherium=*?; *Microtherulum=*?; *Acristatherium*=?**

555. Carotid foramen, Carotid foramen: (0) position within basisphenoid; (1) at junction of basisphenoid and petrosal; (2) through opening of cavum epiptericum.

***Kielantherium cuii*=?; *Jeholotherium antiquum*=?; *Liaodelta antiqua=?; Cocotherium=*?; *Microtherulum=*?; *Acristatherium*=?**

556. Overhanging roof of the orbit: (0) Absent; (1) Present, formed by the frontal.

***Kielantherium cuii*=?; *Jeholotherium antiquum*=?; *Liaodelta antiqua=?; Cocotherium=*?; *Microtherulum=*?; *Acristatherium*=?**

557. Infraorbital foramina number: (0) Numerous small foramina of similar size; (1) two or more; (2) One.

***Kielantherium cuii*=?; *Jeholotherium antiquum*=2; *Liaodelta antiqua=?; Cocotherium=*2; *Microtherulum=*?; *Acristatherium*=2**

558. Composition of the posterior opening of the infraorbital canal (maxillary foramen): (0) Between the lacrimal, palatine, and maxilla; (1) Exclusively enclosed by the maxilla; (2) Enclosed by the maxilla, frontal and palatine.

***Kielantherium cuii*=?; *Jeholotherium antiquum*=?; *Liaodelta antiqua=?; Cocotherium=*?; *Microtherulum=*?; *Acristatherium*=?**

559. Size and shape of the lacrimal: (0) Small, oblong-shaped on the facial part of the rostrum; (1) Large, triangle-shaped on the facial portion of rostrum; (2) Crescent shaped on the facial portion of the rostrum; (3) Reduced to a narrow strap; (4) Absent from the facial portion of the rostrum.

***Kielantherium cuii*=?; *Jeholotherium antiquum*=1; *Liaodelta antiqua=?; Cocotherium=*0; *Microtherulum=*?; *Acristatherium*=0**

560. Lacrimal facial process, contact with septomaxilla: (0) Absent; (1) Present. (K143)

***Kielantherium cuii*=?; *Jeholotherium antiquum*=?; *Liaodelta antiqua=?; Cocotherium=*?; *Microtherulum=*?; *Acristatherium*=?**

561. Location of the lacrimal foramen: (0) Within the orbit; (1) On the facial side of the lacrimal (anterior to or on the anterior orbital margin).

***Kielantherium cuii*=?; *Jeholotherium antiquum*=1; *Liaodelta antiqua=?; Cocotherium=*?; *Microtherulum=*?; *Acristatherium*=0**

562. Number of lacrimal foramina: (0) One; (1) Two.

***Kielantherium cuii*=?; *Jeholotherium antiquum*=0; *Liaodelta antiqua=?; Cocotherium=*0; *Microtherulum=*?; *Acristatherium*=1**

563. Lacrimal foramen composition: (0) Within the lacrimal; (1) Bordered by or within the maxilla.

***Kielantherium cuii*=?; *Jeholotherium antiquum*=?; *Liaodelta antiqua=?; Cocotherium=*?; *Microtherulum=*?; *Acristatherium*=?**

564. Maximum vertical depth of the zygomatic arch relative to the length of the skull (this character is designed to indicate the robust vs. gracile nature of the zygomatic arch): (0) Between 10-20%; (1) Between 5-7%; (2) Zygoma incomplete; (3) >20%.

***Kielantherium cuii*=?; *Jeholotherium antiquum*=1; *Liaodelta antiqua=?; Cocotherium=*1; *Microtherulum=*?; *Acristatherium*=1**

565. Ultimate upper molar implanted in the anterior root of zygoma: (0) Absent. (1) Present.

***Kielantherium cuii*=0; *Jeholotherium antiquum*=0; *Liaodelta antiqua=?; Cocotherium=*?; *Microtherulum=*0; *Acristatherium*=?**

566. Frontal/alisphenoid contact: (0) Dorsal plate of the alisphenoid contacting the frontal at the anterior corner; (1) Dorsal plate of the alisphenoid with more extensive contact with the frontal (~50% of its dorsal border); (2) Absent.

***Kielantherium cuii*=?; *Jeholotherium antiquum*=?; *Liaodelta antiqua=?; Cocotherium=*?; *Microtherulum=*?; *Acristatherium*=?**

567. Frontal-maxilla facial contact: (0) Absent; (1) Present.

***Kielantherium cuii*=?; *Jeholotherium antiquum*=0; *Liaodelta antiqua=?; Cocotherium=*?; *Microtherulum=*0; *Acristatherium*=?**

568. Nasal-frontal suture - medial process of the frontals wedged between the two nasals: (0) Absent; (1) Present.

***Kielantherium cuii*=?; *Jeholotherium antiquum*=?; *Liaodelta antiqua=?; Cocotherium=*?; *Microtherulum=*1; *Acristatherium*=0**

569. Posterior width of the nasal bones: (0) Broader than the width at the mid-length of the nasal; (1) Reduced/narrow; (2) Parallel-sided with straight sutures (consistent width throughout length).

***Kielantherium cuii*=?; *Jeholotherium antiquum*=?; *Liaodelta antiqua=?; Cocotherium=*0; *Microtherulum=*1; *Acristatherium*=0**

570. Pila antotica: (0) Present; (1) Absent.

***Kielantherium cuii*=?; *Jeholotherium antiquum*=?; *Liaodelta antiqua=?; Cocotherium=*0; *Microtherulum=*?; *Acristatherium*=?**

571. Fully ossified medial orbital wall of the orbitosphenoid: (0) Absent; (1) Present, forming the ventral floor of the braincase but not the entire orbital wall; (2) Present, forming both the braincase floor and the medial orbital wall.

***Kielantherium cuii*=?; *Jeholotherium antiquum*=?; *Liaodelta antiqua=?; Cocotherium=*?; *Microtherulum=*?; *Acristatherium*=?**

572. Separation of the optic foramen from the sphenorbital fissure: (0) Absent; (1) Present.

***Kielantherium cuii*=?; *Jeholotherium antiquum*=?; *Liaodelta antiqua=?; Cocotherium=*?; *Microtherulum=*?; *Acristatherium*=?**

573. Exit for maxillary nerve: (0) Separate from sphenorbital fissure, behind alisphenoid; (1) Separate from sphenorbital fissure, within alisphenoid; (2) Confluent with sphenorbital fissure.

***Kielantherium cuii*=?; *Jeholotherium antiquum*=?; *Liaodelta antiqua=?; Cocotherium=*?; *Microtherulum=*?; *Acristatherium*=?**

574. Separate anterior opening of orbitotemporal canal: (0) Absent; (1) Present.

***Kielantherium cuii*=?; *Jeholotherium antiquum*=?; *Liaodelta antiqua=?; Cocotherium=*?; *Microtherulum=*?; *Acristatherium*=?**

575. Orbital opening for the minor palatine nerve: (0) Absent; (1) Present.

***Kielantherium cuii*=?; *Jeholotherium antiquum*=?; *Liaodelta antiqua=?; Cocotherium=*?; *Microtherulum=*?; *Acristatherium*=?**

576. Anterior part of the jugal on the zygoma: (0) Anterior part of the jugal extends to the facial part of the maxilla and forms a part of the anterior orbit; (1) Anterior part of the jugal does not reach the facial part of the maxilla and is excluded from the anterior orbit margin.

***Kielantherium cuii*=?; *Jeholotherium antiquum*=?; *Liaodelta antiqua=?; Cocotherium=*0; *Microtherulum=*0; *Acristatherium*=0**

577. Posterior part of the jugal: (0) Contributes to the squamosal glenoid; (1) Borders on but does not contribute to the squamosal glenoid; (2) Terminates anterior to the squamosal glenoid.

***Kielantherium cuii*=?; *Jeholotherium antiquum*=?; *Liaodelta antiqua=?; Cocotherium=*?; *Microtherulum=*2; *Acristatherium*=?**

578. Maxilla in the sub-temporal margin of the orbit: (0) Absent; (1) Present; (2) Present and extensive.

***Kielantherium cuii*=?; *Jeholotherium antiquum*=?; *Liaodelta antiqua=?; Cocotherium=*?; *Microtherulum=*2; *Acristatherium*=?**

579. Maxilla cylindrical shape (lacking facial, zygomatic, and palatal processes): (0) Absent; (1) Present.

***Kielantherium cuii*=?; *Jeholotherium antiquum*=0; *Liaodelta antiqua=?; Cocotherium=*0; *Microtherulum=*0; *Acristatherium*=0**

580. Orbital process of the frontal borders on the maxilla within orbit: (0) Absent; (1) Present.

***Kielantherium cuii*=?; *Jeholotherium antiquum*=?; *Liaodelta antiqua=?; Cocotherium=*?; *Microtherulum=*?; *Acristatherium*=?**

581. Anterior ascending vascular channel (for the arteria diploëtica magna) in the temporal region: (0) Open groove; (1) Partially enclosed in a canal; (2) Completely enclosed in a canal or endocranial; (3) Absent.

***Kielantherium cuii*=?; *Jeholotherium antiquum*=?; *Liaodelta antiqua=?; Cocotherium=*?; *Microtherulum=*?; *Acristatherium*=?**

582. Posttemporal canal for the arteria and vena diploëtica: (0) Present, large; (1) Small; (2) Absent.

***Kielantherium cuii*=?; *Jeholotherium antiquum*=?; *Liaodelta antiqua=?; Cocotherium=*?; *Microtherulum=*?; *Acristatherium*=?**

583. Nuchal crest: (0) Overhanging the concave or straight supraoccipital; (1) Weakly developed with convex supraoccipital.

***Kielantherium cuii*=?; *Jeholotherium antiquum*=?; *Liaodelta antiqua=?; Cocotherium=*0; *Microtherulum=*1; *Acristatherium*=0**

584. Sagittal crest: (0) Prominently developed; (1) Weakly developed; (2) Absent.

***Kielantherium cuii*=?; *Jeholotherium antiquum*=1; *Liaodelta antiqua=?; Cocotherium=*0; *Microtherulum=*1; *Acristatherium*=0**

585. Tabular bone: (0) Present; (1) Absent.

***Kielantherium cuii*=?; *Jeholotherium antiquum*=1; *Liaodelta antiqua=?; Cocotherium=*1; *Microtherulum=*1; *Acristatherium*=1**

586. Occipital slope: (0) Occiput sloping posterodorsally (or vertically oriented) from the occipital condyle; (1) Occiput sloping anterodorsally from the occipital condyle (such that the lambdoidal crest is leveled anterior to the occipital condyle and condyle is fully visible in dorsal view of the skull).

***Kielantherium cuii*=?; *Jeholotherium antiquum*=?; *Liaodelta antiqua=?; Cocotherium=*?; *Microtherulum=*?; *Acristatherium*=1**

587. Foramina on the dorsal surface of the nasals: (0) Absent; (1) Present.

***Kielantherium cuii*=?; *Jeholotherium antiquum*=0; *Liaodelta antiqua=?; Cocotherium=*0; *Microtherulum=*0; *Acristatherium*=0**

588. Septomaxilla: (0) Present, with the ventromedial shelf; (1) Present, without the ventromedial shelf; (2) As a projection abutting the anterolaterior side of the nasal; (3) Absent.

***Kielantherium cuii*=?; *Jeholotherium antiquum*=?; *Liaodelta antiqua=?; Cocotherium=*1; *Microtherulum=*0; *Acristatherium*=0**

589. Septomaxilla, Facial process, contact with maxilla, presence (0); absent (1).

***Kielantherium cuii*=?; *Jeholotherium antiquum*=?; *Liaodelta antiqua=?; Cocotherium=*?; *Microtherulum=*?; *Acristatherium*=?**

590. Internarial process of the premaxilla: (0) Complete bar (connected to nasal); (1) Incomplete bar (ventral process present but not connected to nasal); (2) Absent.

***Kielantherium cuii*=?; *Jeholotherium antiquum*=2; *Liaodelta antiqua=?; Cocotherium=*2; *Microtherulum=*2; *Acristatherium*=2**

591. Posterodorsal process of the premaxilla: (0) Does not extend beyond canine (“short or absent”); (1) Extends beyond canine (“intermediate”); (2) Contacts frontal posteriorly (“long”).

***Kielantherium cuii*=?; *Jeholotherium antiquum*=?; *Liaodelta antiqua=?; Cocotherium=*0; *Microtherulum=*0; *Acristatherium*=0**

592. Facial part of the premaxilla borders on the nasal: (0) Absent; (1) Present.

***Kielantherium cuii*=?; *Jeholotherium antiquum*=1; *Liaodelta antiqua=?; Cocotherium=*1; *Microtherulum=*1; *Acristatherium*=1**

593. Premaxilla contact with the lacrimal (not the maxilla) on lateral surface of the snout: (0) Absent; (1) Present.

***Kielantherium cuii*=?; *Jeholotherium antiquum*=0; *Liaodelta antiqua=?; Cocotherium=*0; *Microtherulum=*0; *Acristatherium*=0**

594. Premaxilla posteriorly contacts the palatine on hard palate: (0) Absent; (1) Present.

***Kielantherium cuii*=0; *Jeholotherium antiquum*=0; *Liaodelta antiqua=?; Cocotherium=*0; *Microtherulum=*0; *Acristatherium*=0**

595. Premaxilla – palatal process relative to the canine alveolus: (0) Does not reach to the level of the canine alveolus; (1) Reaches the level of the canine alveolus.

***Kielantherium cuii*=?; *Jeholotherium antiquum*=?; *Liaodelta antiqua=?; Cocotherium=*?; *Microtherulum=*0; *Acristatherium*=?**

596. Incisive foramina size: (0) Small (one or two incisors); (1) Intermediate (three or four incisors); (2) Large (more than half the palatal length).

***Kielantherium cuii*=?; *Jeholotherium antiquum*=?; *Liaodelta antiqua=?; Cocotherium=*?; *Microtherulum=*?; *Acristatherium*=?**

597. Palatal vacuities: (0) Absent; (1) Present, near palatomaxillary border; (2) Present, either positioned near or extended to the posterior edge of bony palate.

***Kielantherium cuii*=?; *Jeholotherium antiquum*=?; *Liaodelta antiqua=?; Cocotherium=*0; *Microtherulum=*?; *Acristatherium*=0**

598. Major palatine foramina: (0) Absent; (1) Present.

***Kielantherium cuii*=?; *Jeholotherium antiquum*=?; *Liaodelta antiqua=?; Cocotherium=*?; *Microtherulum=*?; *Acristatherium*=?**

599. Ossified ethmoidal cribriform plate of the nasal cavity: (0) Absent; (1) Present.

***Kielantherium cuii*=?; *Jeholotherium antiquum*=?; *Liaodelta antiqua=?; Cocotherium=*?; *Microtherulum=*?; *Acristatherium*=?**

600. Posterior excavation of the nasal cavity into the bony sphenoid complex: (0) Absent; (1) Present; (2) Present and partitioned from the nasal cavity.

***Kielantherium cuii*=?; *Jeholotherium antiquum*=?; *Liaodelta antiqua=?; Cocotherium=*?; *Microtherulum=*?; *Acristatherium*=?**

601. External bulging of the braincase in the parietal region: (0) Absent; (1) Expanded (the parietal part of the cranial vault is wider than the frontal part, but the expansion does not extend to the lambdoidal region); (2) Greatly expanded (expansion of the cranial vault extends to the lambdoidal region).

***Kielantherium cuii*=?; *Jeholotherium antiquum*=?; *Liaodelta antiqua=?; Cocotherium=*?; *Microtherulum=*?; *Acristatherium*=?**

602. Anterior expansion of the vermis (central lobe of the cerebellum): (0) Absent; (1) Present.

***Kielantherium cuii*=?; *Jeholotherium antiquum*=?; *Liaodelta antiqua=?; Cocotherium=*?; *Microtherulum=*?; *Acristatherium*=?**

603. Overall size of the vermis: (0) Small; (1) Enlarged.

***Kielantherium cuii*=?; *Jeholotherium antiquum*=?; *Liaodelta antiqua=?; Cocotherium=*?; *Microtherulum=*?; *Acristatherium*=?**

604. Lateral cerebellar hemisphere (excluding the paraflocculus): (0) Absent; (1) Present.

***Kielantherium cuii*=?; *Jeholotherium antiquum*=?; *Liaodelta antiqua=?; Cocotherium=*?; *Microtherulum=*?; *Acristatherium*=?**

605. External division on the endocast between the olfactory lobe and the cerebral hemisphere (well-defined transverse sulcus separating the olfactory lobes from the cerebrum): (0) Absence of external separation of the olfactory lobe from cerebral hemisphere; (1) Enlarged olfactory lobes; (2) Clear division of transverse sulcus.

***Kielantherium cuii*=?; *Jeholotherium antiquum*=?; *Liaodelta antiqua=?; Cocotherium=*?; *Microtherulum=*?; *Acristatherium*=?**

606. Encephalization quotient: (0) Below 0.13; (1) Between 0.15-0.25, (2) Above 0.26.

***Kielantherium cuii*=?; *Jeholotherium antiquum*=?; *Liaodelta antiqua=?; Cocotherium=*?; *Microtherulum=*?; *Acristatherium*=?**

607. Expansion of the posterior cerebral hemisphere (for each hemisphere, not the combined width of the posterior hemispheres): (0) Absent; (1) Present.

***Kielantherium cuii*=?; *Jeholotherium antiquum*=?; *Liaodelta antiqua=?; Cocotherium=*?; *Microtherulum=*?; *Acristatherium*=?**

**Data matrix**

#NEXUS

Begin data;

Dimensions ntax=131 nchar=607;

Format datatype=standard symbols="0123456789ABCDEFGHJKMNPQRSTUVWXYZabcdefghjkmnpq" gap=-;

Matrix

Thrinaxodon 00000000?0000000000?0000?000?000000???0?0?0101010000000000100?00000000001{01}????0?????????????????????

??????{01}????0???????????????????????2?10?????0???00??00?????0???????????????????????????????????000??

??0????0?0??0??100??????0????????0000?000??0000???????0??????????????????????0???00????????????????0

00???000000001000?000000?0?0000?00000000000000100000000??000?0????00000000???000?00000000?000000?000

0?00000000000000000000000110000000???00?0000??00?0??????000000??000?0000000?000?00000000110000000?00

00?0?00?00??0?{01}?000000?00000010000000000000000000000000000000000000000000000?000000000{01}0000000000000

0000000

Massetognathus 00000010?0000000001?00010000?000000???0?0001000100000000001000001{01}000{01}0010????0?????????????????????

??????0????0???????????????????????2?00?????0???00??00?????0????????????????????????????????0??01???

??0????0?0??0??0?0???????????????0000?000??0??????????0???????????30???0?????0???1?????????????????0

00???0????????000?000?0?0?????0??1??0????0000000000000??000?????????1000?00??000???00??0????0?00????

?????????0???????????????????????????00??0????00????????101000??000??00?000?000?00000?0011000000??0?

00?0?00?00??0?0?101000?000000110000100000001100000001020000?0000000000100000?0000000000??00000000000

0000010

Probainognathus 00000000?000000000{01}?00010000?000000???0?00010001000000000000000?00000000?1????0?????????????????????

??????1????0???????????????????????0?10?????0???00??00?????0???????????????????????????????????000??

??0????1?0??0??100??????0????????0000?000??0?0????????0??????????????????????0???0?????????????????0

00???000?0000?000?000?0?0?00100000000?000?000000000?00000000?0??????100000????00?00000000??00000?000

????????0????????????????????????????????0????00?0???0??10000000{01}0000000000?000?00000000111000000?00

00?0?0??00??0?0?001000?0000????000010000000110000000100000000000000000100000?00000000000000000000000

0000000

Oligokyphus 000000110100010??0100000?0010110?10?????3?0031{01}211000000001000111???1????0????20????????????????????

??????0??????????????????????????????012000?0???????0????????????????????????????????????00002021410

0100?0???1000000310012???????????0?????00??2???????????????????????0000101???????4?????????????????0

022??2100?1?0?0?0?0000?????0110000000000000000110001001{01}0000?????0??2000001??000?011?0000?000000?000

0000??000000?00?0000000001???????????????00???{01}??0?0??0?00111000{01}00000000?0?000???00?0000000000?0?10

00???00?12??1?{01}10?3111012??????000???0??1111?100?1011??01?0001?0??0000?????1??00?0000100?{01}0100?00???

0??????

Fossiomanus 000000????????0?{01}?10000??0010?1??10?????3?0031{01}4?1000?00003000111???1????0????20????????????????????

??????0??????????????????????????????012000?0???????0????????????????????????????????????00003021410

0300?4???1000000310002???????????0?????00??2???????????????????????0000101???????4??????????????????

022??21??1?11100??{01}000????????????????????00001?000?0012{01}000?00000111?000?00{01}000?001?0000?100000?0?0

00?00?0000?0??0????????0?10000????00000?00????1??0?????????11000{01}0?000????????????????????????0?????

00?0????????????0???????2?00???00??100?0??????00????????????????????????????????????????????????????

0??????

Kayentatherium 000000110100000010100000?001111{01}?10???????0031{01}4110000?00031?0111???1????0????20????????????????????

??????0??????????????????????????????012000?0???????0????????????????????????????????????00002021410

0100?1???1000000310002???????????0?????00??2???????????????????????0000101???????4??????????????????

022??2100?000?000?0000?????101001000010000000011000?001??000?0???01120000?0??000?001?0000??00???????

?????????????????????????????????????????00???1??0?0??0?00111000?????00?0?0?00????10?0000?00000?0?10

00?0?00?1???1???013101012??????000?00000?111110000011??01?1000?3?0000?200??0?100?0000?00010000?00???

0??????

Yunnanodon ?????????????????????00?????????????????????3??3?100?0?000??????1????????0????20????????????????????

?????????????????????????????????????012000?0???????0????????????????????????????????????000?2021410

0100?2????0????0?1?0???????????????????????2????????????????????????00???1???????4??????????????????

??2???1?????????????????????????????????????????????????????????????????????????????????????????????

??????????????????????????????????????????0???1?????????01??1?00{01}0?000000000000?00?00000?00000000?10

00?0?00?12?010110??110??20??????00??0??0?11???00000?1??01?11???0?0000?200??0??00??00?0000?000???0??1

0??0???

Bocatherium ?????????????????????00????11111?10?????3?003?12?10??0??003??2111???1????0????20????????????????????

??????0??????????????????????????????012000?0???????0????????????????????????????????????00002021410

0100?4????0000003100?2?????????????????????2???????????????????????0000101???????4??????????????????

?22??2??????????????????????????????????????????????????????????????????????????????????????????????

??????????????????????????????????????????????1???????????????00??????000?0??0?????0???????000??????

?????00??????????????????????????????????11???00000?1??01?101??0???00??????0?010??????101??111?00???

???????

Bienotheroides 0000011101?0000000100000?0011?10?{12}0?????3?0031{01}2110000?0003000111???1????0????20????????????????????

??????0??????????????????????????????012000?0???????0????????????????????????????????????00002021410

0100?{13}???1000000310002???????????0?????00??2???????????????????????0000101???????4??????????????????

022??22???000???0?0??0???????100?000?0000000001?000100?00000?0?????????0???????0?00??0000???????????

?????????????????????????????????????????00???1??0??????00?11?00{01}????0000?0?00?????00000?00001000?10

00?0?00?12????11013101012??????000?1?0?011111100100?1??01?1001?3?0000?2????0?01000000010110111?00?0?

0??????

Bienotherium 00000011010000???01?000??0010110?{12}0?????3?0031{01}31100?0?0002???111???1????0????20????????????????????

??????0??????????????????????????????012000?0???????0????????????????????????????????????00002021410

0100?1???1000000310002???????????0?????00??2???????????????????????0000101???????4??????????????????

022??21???????????????????????????????????0000??000?0?1????0??????????????1????0?001?0000???????????

?????????????????????????????????????????00???1??0??????0??110?0?????0000?0?00????00?0000000010?0?10

00?0?00?????1?1?0??1110?2???????00?????011?11?00000?1??01?00?????000?0???????000?0000102010000?00???

0??????

Tritylodon ?????????????????01??000??????????????????0031?21?0??0??002???111???1???00????20????????????????????

??????0??????????????????????????????012000?0???????0????????????????????????????????????00002021410

0100?1???1000000310002???????????0?????00??2???????????????????????0000101???????4??????????????????

?22??2?????????????????????????????????????????????????????????????????????????????1????????????????

??????????????????????????????????????????????1??????????011?0??????????????0???????????0?????????1?

????????1???1?1???3????1????????????????1111110????????????????3??????????????0?????0????1??00??????

???????

Polistodon 0000001141{01}000000010?0013000?01001250?003?003{01}{01}4?100?0?0003000111???1????0????20????????????????????

??????0??????????????????????????????012000?0???????0????????????????????????????????????????3021410

0300?4???1000000310002???????????0?????????2???????????????????????0000101???????4??????????????????

022??21?????????????????????????????????????????????????????????????????????????????????????????????

??????????????????????????????????????????0???1??{01}???????0?11?00{01}????000?00?0??????00000??????000?10

00?0?00?12???????1??????????????????????1111??00?00?1?00??101003??002?2??????010?0000012110111?00?0?

0?????0

Camurocondylus 01000101000000000?2??0012000?0000?120?0111001?0???????????????????????????{12}?????0000?0000??00??????0

00??002??????0??00?0000000001??0?03??20?????0???00?410?????0????0????????????????????01000000??122??

??0???3??0?????200???00?0000020??21010001101000??????00????01????00?????????01???10?0????????????0??

020??2??????????????????????????????????????????????????????????????????????????????????????????????

?????????????????????????????????????????????????00?????23?111111????00?????1??????1?0??????????????

00000???10???????????????????????????????111??{12}0?1?????01??0????0??0??2???????0????1??0???0?00??0???

???????

Diarthrognathus 000000?100000000001000011000?000??100?0000000?1???????????????????????????????0?????????????????????

??????0??????????????????????????????00?????0??????00??????????????????????????????????????????000??

??0??????0?????0?????0???????????0????????????????????0????0????????????????????????????????????????

00???0??????????????????????????????????????????????????????????????????????????????????????????????

?????????????????????????????????????????????????0??????2??11?????0??0??????00?????00001???0????0?10

00??????0??????1???????????????????????0111?1???00??1?00??????010??0001???????00???{01}0???????00??????

0?????0

Riograndia 0{01}?00001000000??10100001100?110000?00?00300001121000100000110?1000?0010000????00????????????????????

???????????00??????????????????????{01}?10?????0??????000?????0???????????????????????????????????000??

??0????{12}?0?????100???0???????????0?000000??0??????????0????0????????????????00??????????????????????

01???10????????1?????0???????1?000??0?000?00?11?000?00??????????????????1???????????????????????????

??????????????????????????????????????????0??0??0??0?00??0000000???000?0??0?00?????0?00011?0000???00

00???0001?0?0?110?2000???1?????00??1?0?011111?1000121?001???00010?0?00?????11?00?00?0?1010000001010?

0???{01}??

Brasilodon 0{01}000000???0?0??10100001100?1100010???0?0?0001010000?000??1?000000?0010011????00????????????????????

??????1????00??????????0???????????{01}?10?????0??????010?????0???????????????????????????????????000??

??0????{12}?0?????100???0???????????14000001??0??????????0????0????????????????00??????????????????????

01???10????????0???????????????0????0???0?00000?000110100000??????????01??10???1000??0?00?100??????1

?0?0000?00?00??0?1????????????????????????0??0??00?0?0000101110010?000?00?0?00??1?10?0001000001???00

00000000100?0?110?210112200??11?00?1?0?0111?1?1000101?001??000?100??00?????01?00?0000100110000010100

0?01{01}??

Brasilitherium 0{01}?000?0???0?0???010?001100?0?000{23}??????0?0?01001000?0000010000000?0010?11?????0????????????????????

??????1????00??????????0?????????????10?????0??????010?????0???????????????????????????????????0?0??

??0??????0?????100???0???????????01010001??0??????????0????0????????????????00??????????????????????

0{01}???10????????????????????????????????????????????1??1????????????????????????10??1????????????????

?????????????????????????????????????????????0?100?0?00?1101{01}11?1??000?0??0?10??????????1??00?1?????

???00??01?????1???2????2??0?????0??????0111?1?10????1??0???????1??0?0???????1?0????10??0110?000?0???

00??{01}{01}{01}

Pachygenelus 0000000100000001001000011000?000000000002000010310000000002000000100000011????0????0??????????????1?

??????1????1?0?????1?00?0000??????00?00?????0???00?000?????0??????????????????????????0????????000??

??0???03?0??0??{01}00???0??0????????00000000??0000???????0????0????????????????00???00????????????????0

00???{01}?0000?0??00???000100?00000?000000000000001000000100000?1000???2100011??0?0?00100000?0?0?00???0

????????00?0???0?????????0???????????????000000100?0?0?01100100010000000000?000?00000000110000000?00

0000?00010000?0?002100?21100?11000010000111111100000100020000101000000100000?10000000000100000010000

00?????

Pseudotherium ???????????????????????0????????????0?????????????00????????????00000????1?????0????????????????????

???????????????????????????????????0?10?????0??????000?????0???????????????????????????????????000??

??0????????????1????????????????????????0?????????????0????0????????????????0???????????????????????

01??????????????????????????????????????????????????????????????????????????????????????????????????

??????????????????????????????????????????0????000?0?00???01?1101??000?0??1?00??0?00??0{01}00?0001???1?

00000?001?????10????0???1000????????????101?011000??1?001???{01}101000{01}00{01}???????00?0011?001?0000000???

0??????

Sinoconodon 0100000100000000002?00012000?000000?01000000{01}100000000000000000000000000123???00??00?00?????????????

??????23???200?0???110000000?0?0?01??20?????0???00?000?????0????0????????????????????00????????000??

??0???13?0?????200???0000000020??00000000?11000???00?00????0?????00?????????00???00?0?00??????000??1

020??200?0??0?0??????010000000000000000000000001000?00????00???????????????????0?00??00?0????00?????

?????????????????????????????????????????00002010000?00022011100100000000010111010100000000000100010

00000000100010101021000?1100111000010000111?1?100101100010100001000000200010020000000010?00000000001

{01}000000

Megazostrodon 0100010100000000002000012000?0000012020010001101?00000000000000000000001120???00??00?0000????0????10

00??0020???000?0???00000020010?0?010?20?????0???00?410?????0????0????????????????????0100??????122??

??????10?0??0??200???0000000020??21010001001000???00?00????0?????00?????????01???10?0?00??????0000?2

020??200?0000?0?10100??????0?10000000?0000000001000?0010000???0??0??21000110?000?10?0000??000000?000

00000000000000?00?0??0?0?1?000000000?000000?1?0100???00023??11011010?00000101110100000011?1000110?10

000000001000101100210???21?????00001?000???11?10?1???0001010010100000?2?001002000001?0???1??00??00??

???????

Morganucodon 0100010100000000002000012000?0000012010000001101000000000000000000000001120???100000?0000???00????00

00??002{01}???000?000?01000020010?0?0{12}{12}?20?????0???00?310?????0????0????????????????????0100??????121??

??0???{23}1?0?????200???0000000020??20010001101000???00?00????0?????00?????????01???10?0?00??????0000?0

020??20000000???1?1?00?1???00100?0000?0000000001000100100000????????21000110?000?1010000100?0000??00

0000000000000000000000000???0????????0???000120100{01}{01}?00023011111101000000010111010100001101000110010

00000000100010100021010321001??000010000111111100101000010100101000000200010020000011011?00000000001

{01}000110

Hadrocodium 01??0?1100010?00?1??00012000?00000120100200?{01}100?00000000000000000000001123???100000?0000????0????10

00??0022???000??00?100000000?0?0?044?20?????0???0???10?????0????0????????????????????0100??????122??

??0???44?0?????200???0000000020??00000000?01000???00?00????0?????00?????????00???10?0?00??????0000??

020??20???????????????????????????????????????????????????0?????????????????????????????????????????

??????????????????????????????????????????1000020101?00023?1111230100000001?111010?20001102010101010

00000000100?1010????????21?0???????1???0???1112012?1?020101?00010000012?2?10020010121101??000???000?

2??1211

Dianoconodon 01000111000000000?200001200000000012000010001100000000000000000000000001022???100000?0000???01????00

00??0021???200??00?0000000001000?033?20?????0???00?010?????0????0????????????????????00????????121??

??0???32?0?????20????0000000020??0001?000?01000???00?00????0?????00?????????00???10?0?00??????0000??

020??2??????????????????????????????????????????????????????????????????????????????????????????????

??????????????????????????????????????????0002020?01?0002301111130?0000000??1?10100000011?1010??0010

00000000100010??1021010320201110000100001111111001??1??01010010??0000?20???00?00?001100111000000000?

{01}???1??

Feredocodon 01000111000001001120100140000000001{23}000110011100000000010000000000110011120???100000?00{01}0???00????00

00??0020???000??00?1112002011200?130?20?????1??0110110?0?01101010?00???0?0??0000000?13121??????122??

??0???30?0?????212???00110003200?31001000?00001?0001000????0?????33???????1012???10??301?????01110??

021?22?001111?0???0?00?0????110????10?????001?1?0?1??01001?1000??01121??001????0??010000???11000?01?

0???????100?0????????0000????000100000??000?2?020?11?00?23?1111?3??0000000??1??????????????????????0

?00?????1???????41311113211?1??00001{01}0001?111?20?1??1??0????0?0?????0???????0?0???1{12}110??00?0??000??

{01}??????

Shuotherium 01010110??????00?12??00??0000?00?0?????????1110???????????????????????????????????0???????????????0?

??????2?????00??00?1112000111100?1???20?????1??011?110?0?01101010?00???0?0??0000000?13?????????122??

??0???3??0?????212???00110003200?31001000?00001?0001000????0?????33???????1012???10?0301?????01110??

021?220?????????????????????????????????????????????????????????????????????????????????????????????

????????????????????????????????????????????????????????????????????????????????????????????????????

??????????????????????????????????????????????????????????????????????????????????????1?????????????

???????

Pseudotribos 01?100110000?0001?2??001{24}00???????1{23}01011001110???00?0???00?00?001000101020???100000?00?0???00????00

00??0020???000??00?1111000?111?0?131?20?????1??011?110???0111?010?00???0?0??0000000?13?????????122??

??0???31?0?????212???00110003200?31001000?00001?000??00????0?????33???????1012???10?0301?????01110??

021?2?0??????101??00?010001??????????0????0???12000?0?????0?0???????211????00?10??0?00000?0?00??????

?????????????????????????????????????0???0??????????????????????????????????????????????????????????

????????????????????????????????????????????????????????????????0????????????20???1?????????????????

???????

BorealestesS 0100011100001100112??001{24}1100101001{23}0101200011010000000000000000????001102????1?0000?00????????????0

00??0020???000??00?1102010111110?12??20?????1???00?110?0?021111?0?00???0?0???000000??21?1??????121??

??0???00?0?????212???00110003200?310000011?0001?0101500????0?????33???????1012???10?0?01?????01?10??

021?220?0?????0????00???????1?????????????00??1?????????????????????21000?????????????????????????10

01010?1?000000000000000001?10??01?????????001?000011??0023??1100301000000?101?10???????????100110??0

100?????10?11?????????????0???????0?0??0??????2?????????1?1?01??????0??????0?20???11?????1?????0?0??

????1??

BorealestesC 0100011100001100112??001{24}1100101001{23}010120001101000000000000000000010011020???100000?000????01????00

00??0020???000??00?1102010111110?120?20?????1???00?110?0?021111?0?00???0?0??1000000??2121??????121??

??0???00?0?????212???00110003200?310000011?0001?0101500????0?????33???????1012???10?0?01?????01?10??

021?220?0?????0????000?????1?10??0110?00??00?01?000?0?????????????????????????????????????????????10

01010?100000?0000000000001????????????????001?000011??00????????????????????????????????????????????

??????????????????????????????????0??0????????2?????????1?1?01?????????????0?20???????????????000???

???????

Microdocodon 0100001100001100112??001{24}0?00100001{23}01002000110????????????000000???011?020?????0000?000????00?????0

00????20????00??00?110?012111210?120?20?????1???00?110?0?021111?0?00???0?0??1000000??2121??????121??

??0???20?0?????212???00110003000?31001000??0001?0101500????0?????33???????1012???10?0?01?????01?10??

021?220?????010?0?0000?00?11110?11?100000?00001?001?1??????10???????210000?00000?00?0000??0110011010

0??10?1010000000000000?0??000000?000?0??00??1??2??11????23??110????????00???????????????????????????

??0??????????????0???????1?????10?010010??1????????????0???????????????????0?20????1????????0???????

???????

Docodon 0100001100001100112??001{24}0000000001{23}0?001000110????????????0000000?1001?022????00000?000????00????00

00??0020???000??00?110?0???1?1?0?10??20?????1???00?110?0?021111?0?00???0?0???000000??2121??????121??

??0???00?0?????212???00110003200?31001000??0001?0101500????0?????33???????1012???10?0?01?????01110??

021?220?????????????????????????????????????????????????????????????????????????????????????????????

????????????????????????????????????????????????????????????????????????????????????????????????????

????????????????????????????????????????????????????????1?????????????????????0?????????????????????

???????

Haldanodon 010000110000100010??0001{24}100?000001{23}01001000110000000000??00000000010011022???100000?0000???00????00

00??0022???000??00?0100012010110?100?20?????1???00?110?0?021111?0?00???0?0???000000??2121??????121??

??0???00?0?00??212???00110003200?30001000?00001?0101500????0?????33???????1012???10?0?01?????01110?0

021?220??????????????????????10010100?00?0000012000?001100110?????1?21?0?????000??010000??0?0?0?????

?????????????????????????????????????0???00010020011?00023??11003010000000101210100?0001102010110010

0000000?1001101000??????2100????000??000??11112011?1{01}00010100101000000200010020010011111?10000000000

0???2??

Castorocauda 010?001100001???1???0001{24}000?000001{23}01001000010???0??0????000?00????001102????1?0000?000????0??????0

00??0020???100??00??100012010100?????20?????1???????10?0???1111????0???????????0000????????????121??

??0???00?0?00??212???001100032?0?30001000?00001?0101500????0?????33???????1012???10?0?01?????01110??

021?220???????0001000?????????????????????000012000?0?11??1?00000011210000?00000?001000010011000?010

0?01?11010000000000000?00?0??0?00000101010??100?????????????????????????????????????????????????????

???????????????????????????????00001000????11??????????0???????10?000?2????0?20????1??11??00????????

???????

Docofossor 010000110000000011200001{24}000?000001{23}0010300011010000000000000?0000010011022???11000??0000???00????00

00??0022???000??00?0100012010100??23?20?????1???00?110?0?0?111010?00???0?0??1000000??2121??????121??

??0???32?0?00??212???00110003200?31001000?00001?0101500????0?????3????????101????1??0?01?????0?0?0??

021?220???????010?000???????????1???????????????000?00110?1?0010102221000?{01}0?0?0?0010000100110011010

0?0101101000000000000000010000000100{01}01001??10?2??????????????00??????00????????????????????????????

???????????????????????????????????????????11???????????????????0??0??????????0????????1?000????????

???????

Agilodocodon 010000110010100011200001{24}000?000001{23}0010200011010000000100000?0000010011020???11000??0000???00????00

00??0020???100??00?0100012111110?120?20?????1???00?110?0?02111110?00???0?0??1000000??2121??????121??

??1???20?0?00??212???00110003000?31001000?00001?0101500????0?????3????????1012???10?0?01?????01110??

021?22000????1010?0000?????1110?1???????0?00?010001?10110?1?10001011210000100000??01000010011000?010

0?0101101000000000000?00010000001100001001??100?0011??0?23??1100?????000001?12????????01??20101100??

00000???1001101000210???21?????00001000????1112??1????0????????10??0???????0020??0?????1?000????????

???????

Adalatherium 1???1?10???0?11011?110?141110010021413011?004113?101101?00311211????1?????4???????0???0?????????????

???????4??????????????00???0??0??024??0????????????0?????????????????????????????????40??????????6??

??0???36?0???????????4???????????0??00000??2??????????0?0????????3????????????????0??????????????112

022??2000???0101111101?????1110??1?00?201010011?22100111111111001011???11220???101111110101110010??1

?100201?12?{12}0??0?1?????1?0?0?00111000?1{01}1???11??0?10?00?1??1??1131?111?1?????????????0??????????????

00??0???????????????????????????????????111111?????????01??1????0?0?0?2????00?0???????10?10000?1???1

???????

Vintana ???????????????????????14???????????????????4??3?1???0??????????1?????????4?????????????????????????

?0???????????????????????????????024??0?????0??????0?????????????????????????????????40??????????5??

??0?????????????????????????????????000???????????????0??????????????????????????????????????????112

022?????????????????????????????????????????????????????????????????????????????????????????????????

??????????????????????????????????????????1011010110?00?22?11111310111101?1?15130002?001?12011111110

00000100100?{12}011????????21??????????????11111100001???101111000300010?21?1?01?0010000010?100{01}0?00011

1{01}11220

Thomasia_antiqua ????????????????????????????????????????????2?????0{01}0??{03}{01}0?00?????????????????????????0????????????2

?000??2?????000?00???2?00000??11?????01010000???????0????????????????????????????????4???20{02}00?21400

{01}0000????10??100310110???????????0??0?00?????????????????????????331121010???????3???????????????1?0

020??20?????????????????????????????????????????????????????????????????????????????????????????????

????????????????????????????????????????????????????????????????????????????????????????????????????

????????????????????????????????????????????????????????????????????????????????????????????????????

???????

Haramiyavia_clemmenseni ??????0????????00??????????00000?0??????0?0021010000000000000000??00010?02??????????????????????????

??????21????000000???0?00000??00?03??01010000???????0????????????????????????????????40??20200021400

10000?32?1000100310120???????????0??0?000?01?????????????????????131121010????0003???????????????10?

020??20???????????????????????????????????00010?0011{01}01000?????????????????????0?0000?????0?????????

????????????????????????????????????????????????????????????????????????????????????????????????????

????????????????????????????????????????????????????????????????0????????????2??????????????????????

???????

Shenshou_lui 1?112?110100013021??111141100120051444001000212411010003113002111???1??1?23???1??211110?????????????

??????24????000100???2?00000???1??4??01010010???????0????????????????????????????????40??20011021400

01010?46?1011100311210???????????0??0?000?03?????????????????????330111011????1103???????????????101

123??30?1111100111100000?101110001?000{12}10?000101001100100010?11001112?002011?0010?01000010100000?001

?0???00?0???1?0?????????10?0?00101001000111?11?10110??0123?111113????1?0????15????????1???????111???

0000????100?20??????????21??????????????1?1?1?20???????01??????10?000?2???????0???021003?2010??00???

1?1????

Arboroharamiya_jenkinsi 1?112?1101000130214?111141100120051444001000212411?10003123002111???1??1?23???1?1211111??????0????23

11111124????011000???{23}?00000??????45?01021110???????0????????????????????????????????40??20011021400

01110?46?11112103113?0???????????0??0?000?22?????????????????????330112011????1113???????????????101

123??3??11111001??100???????1?????????????0???????????1000?0?????1?12?00?01????10?010?10??10?000?00?

?????????????????????????????0??0???10?0????????????????????????????????????????????????????????????

????????????????4??????????0110???????????????????????????????????????????????0?????1???????????????

???????

Ar._allinhopsoni 1?112?11010001302140111141100120051444000000212411110003123002111???1??1?23???1?1211111??????0????23

11111124????011000???{23}?00000??????45?01021110???????0????????????????????????????????40??20011021400

01110?46?11112?03112?0???????????0??0?000?02?????????????????????330112011????1113???????????????101

123??3??11111001??100????1??1100????0?{12}1??00?101??11??100010?11011?12?000011???10?010??01010?000?001

?????0??????????????????10???001?1?010?0?11?11010110??0123?111113??001?0????1?????????????????111???

1000????100?20??4???????21?01100????????1111?1?????????0???????10?????2???????0???0?1?03???10??0????

1??????

Xianshou_linglong 1?112?110100013021??111141100120051444001000212311110003013002111???1????23???1?1211111??????0????23

11111024????011000???{23}?00000???1??45?01021110???????0????????????????????????????????40??20011021400

01110?46?11112103111?0???????????0??0?000?02?????????????????????330112011????1113???????????????101

123??30?11111001??100????1??1100??????????0???????????1000?0?????1?12?002011?0?10?010??01?10?000?0??

?????????????????????????????0???????0???11?11?10110??0123?1?1113??001??????1?????????????????111???

?????????????????????????1??????????????111111?????????0???????10?????2???????0???0?1???????0???????

1??????

Xianshou_songi 1?112?110100013021??111141100120051444001000212???????????30??111???1????23???1??211111??????0????23

11111024????011000???{23}?00000???1??45?01021110???????0????????????????????????????????40??20011021400

01110?46?1?11?103111?0???????????0??0?000?02?????????????????????330112011????1113???????????????10?

1????3??11111001??1001???1??1??????0??{12}1??0001010?110?100010?11??1?12?002011??010?010??0??10?000?001

????????????????????????1????00101?010?01?1?11?10110??0?2????1?1????????????????????????????????????

???0????????????????????21?????????????????????????????01??????10?????????????0?????1?0????1???00???

1??????

Qishou_jizantang 1?112?1101000130214?111141100120051444001000212411010003113002111???1??1?23???1?0211?10??????0????22

11000024????000100???2?00000???1??4??01010010???????0????????????????????????????????40??20011021400

01010?46?1011200311330???????????0??0?0?0?33?????????????????????330111011????1103???????????????101

123??30?11111001111001???1?1110001?000{12}10?00010?001100100010?11001112?000011???10?01000010100000?001

?0??000002????0??????0?010?0?00101001000111?11010110??0123?111113??001?0????15????????1???????111???

0000??0?100?20??????????21??????????????11111120???????01??????10??00?2?????0?0???011003?20100??0???

1??????

Mirusodens_caii 1?112?1101000?3021??111141100120051444001000212411110003123002111???1??1?22???1?1211111??????0????23

11110124????0110010??{23}?00000???1??44?01021110???????0????????????????????????????????40??20011021401

01111?46?10111103112?0???????????0??0?000?03?????????????????????330112010????11?3???????????????10?

123??30????????1???0??????????????????????0?????0?1???1000?0?????1?1??????????????0????0??10?000?00?

?????????????????????????????0???10010?01?1?11010110??0?23?1?1113???????????????????????????????????

?????????????????????????1??????????????111????????????01??????10?????2?????0?0???011?03??0?00??0???

1??????

Vilevolodon_diplomylos 1?112?1101000???2140111141110120?51444001000212411110003113002111???1??1?23???1?1211111??????0????23

11111124????011000???2?00000???1??45?01021110???????0????????????????????????????????40??20011021400

01110?46?1011210311310???????????0??0?000?02?????????????????????330112011????1113???????????????10?

123??30?1?11?101??1?0????1?11????0????????????0??00100100?10?????111???????1???????????????00?00??00

?????0??????1????????????????00?0100100???1?1???0?10??0????11101????????????????????????????????????

????????10??????????????????????????????????????????????0?1010?10???????????0?0???010?0??1??????????

???????

Maiopatagium_furculiferum ???????????????????????????????????????????????4110??003????????1????????23?????0211110??????0????22

1000102???????????????????????????45?01000010???????0????????????????????????????????40??20001021400

02010?????000??0?????0????????????????????????????????????????????????????????00?3???????????????10?

????????1?11?00111?00??001?1110000?00???0?????0??00100100010???0?111??00??11???10?010000???00?00??00

?0??000??0??1????????????????0?00?00100?????????????????????????????????????????????????????????????

???????????????????????????????????????????11?20???????01?1010??0???????????0?0???????0??1?100?000??

???????

Kuehneodon 1?112?10????013021??1001411111201514240010003112?11100030?300?1101101??1?21???100110001??????0????31

0?000021???010??111??2?20120??11?043?010010?0???????0????????????????????????????????40??10?00121400

03000?43?10010103101?0???????????0??0?000?02?????????????????????332001001????01?3???????????????11?

020????1????????????????????????????????????????????????????????????????????????????????????????????

????????????????????????????????????????????????????????????????????????????????????????????????????

????????????????????????????????????????????????????????????????????????????????????????????????????

???????

Rugosodon 1?112?10????0?302???1111411111201524240010003112?00100030?30011101101??1?20???10011?001??????0??????

0???0021???010???11??0?201?0???1?042?010010?0???????0????????????????????????????????40??10100121400

03000?43?1001110310320???????????0??0?000?02?????????????????????332101001????01?3???????????????11?

0????201111110?1111100001101111001?110110010??00?0110010001100?0101121?0110000010?11??????0110010001

20003010{12}0?0120010011000101100011?00001111?0???????????????1?1??????????????????????????????????????

????????????????????????????????????????????????????????1?????????????????????0?????????????0???????

???????

Jeholbaatar 1?112?10????0230214?11114111112015142400100{01}3112?1010003003001111???1??1?20????00110001??????0????31

00000022???010??111??0?20010??01?042?010000?0???????0????????????????????????????????40??11103121400

03000?44?1001010310211???????????0??0?000?02?????????????????????330000121????01?3???????????????11?

020??20????11001??1100?011011110?1?11?11??100?00000100100?1100???01121???1?00??1????????1101?00100?1

?000?0?0{12}210120?100??000?0?100011?000011?10010010010?000???11111????????????????10??????????????1?10

??000???1?0?11???????????1?????11??211?0?11????????1???01?3?1??102010?2????12200??011011??010??000??

???????

Sinobaatar 1?112?10????023021?01111411111201514240010003112?000000{03}003001111???1??1?20???100110001??????0????31

00000022???010??111??0?20010??01?042?010000?0???????0????????????????????????????????40??11103121400

03000?44?1001010310211???????????0??0?000?02?????????????????????330000121????01?3???????????????11?

020??20??1?110011?1100001101111001?1101100100?00001100100?1100001011210{01}1100000111111100??0110010001

20003010{12}210120010011000101100011?00001101001{12}010110?000??11?1??????????????????????????????????????

????????????????4131110421{02}?1??11??21120111??1?????????02??????10??10?2????1?20???????1???0?00??0???

???????

Ptilodus 1?112?10????023021??1111411111201514240010003113?10000?00030??111???1????21???100110000??????0????31

00000023???010??111??0?20010???1?043?010000?0???????0????????????????????????????????40??12203121400

03000?45?10010103103{23}1??????????????0?000?02?????????????????????330000101????01?3???????????????112

020??20????????11?111????????????1?11?????10?00?0001001?0?1??10??0112?011?00???1111111101101?0010??1

?0?0301?22111200?11?1001?0?1000111000???0?0?11??0110?00?13111111???0???01?0?151????1??0212?011111??0

11000?001000??11????????????????????????11111?00021?101020??11010?100?2121?1220120011011?20100?211??

1???1?1

Catopsbaatar 1?112?10????023021??1111411111201514240010003123?10011?00?31?2111???1????22????00110000??????0?????1

00000022???010??111??0?20010??01?044?013000?0???????0????????????????????????????????40??12203121410

03000?45?1001000310211??????????????0?000?02?????????????????????330000101????21?4???????????????112

?20??2?????????1??1????????11??0?1????21?010????00010{01}10001???????112??0???????11?111110??0???0????1

?1?03?1??211120??????????0?1?0??????????1?0011??0110?00?13?1?111???????0??0?151???11?00212?0111?1?10

?????0000?????0?????????????????????????11111?01021?1?11{12}?3?11000?010?2??1?1220120121011?20100?001??

???????

Chulsanbaatar 1?112?10????023021??1111411111201514240010003123?100?1?00?31??111???1????21???100110000??????0????31

00000021???010??111??0?20010??01?043?013000?0???????0????????????????????????????????40??12203121400

03000?45?1001000310211??????????????0?000?02?????????????????????330000101????01?4???????????????112

?20??2??011000?1??1????????????1?1?1??21?0100???0001001?0?1???????112?011?0????11?11110011????010??1

?0?0300??211120??1???????0?1?0???1?00???1?0011??0110??0?13?1?1113?0?0??01?0?151???11?00212?01?1?1?10

11???0001?0???0????1?1?4?1??????????????11111?1102121?11203????10201002??1?12200?0121011?20100?00111

1???1?1

Nemegtbaatar 1?112?10????023021??11114111112015142400100031{12}3?10011?00?31??111???1????21???100110000??????0????31

00000021???010??111??0?20010??01?043?013000?0???????0????????????????????????????????40??12203121410

03000?45?1001000310321??????????????0?000?02?????????????????????330000101????21?4???????????????112

?20??2?0?1100??1??111??????????0?1?1??21?0110?0?000100100?110?????112?011?0????111111100110???010???

??????????????????????????????????????????0011??0110?10?13?1?1113?000??01?0?151???11?00212?0111?1?10

11???0001?0???0?????????????????????????11111?0102121?11203?01010201002??1?12200?0121011?20100?01111

1???1?1

Kryptobaatar 1?112?10????0230214?1111411111201514240010003123?10011?00?31??111???1????21???100110000??????0????31

00000021???010???11??0?20010??01?043?013000?0???????0????????????????????????????????40??12203121400

03000?45?1001000310211??????????????0?000?02?????????????????????330000101????01?4???????????????112

?20??2?0??1????11?1110?????111?101?1??2100100{01}0?00010{01}1001110?0???112?011?000??11?111100110110010??1

?0?0301?{12}2111200?1???????0?1?00111000?11110011??0110?00113?111013??0?0011?0?1512??11000212?01?1?1010

11000000120?1111????????212?????????????1111110102121011203?11010201002121?12201?0021011?20100?00111

1???1?1

Yubaatar 1?112?10????023021??111141111120151{34}{12}400{12}00031{12}??10?????0?3101111???1????21???100110000??????0????3?

000?0024???010??11{01}??0?20000??01?043?013000?0???????0????????????????????????????????40??12203121410

03000?46?100101031022{15}??????????????0?000?12?????????????????????330000101????21?4???????????????11?

022??20????????????????????????????????????0?0??00{01}1?01100110{01}?0?0??2?01110??0011?1111001101100??{01}?1

1000?010{12}211120011??1001?001000111000111010011010110?000131111113?000000??0?151????1000212????111010

0000000012001100?????????1??????????????1111110102121010204?1?010201002????12201?0011011?20100?00???

1?????1

Taeniolabis 1?112?10????023021??11114111112015142400100{01}3123?10010?00031?2111???1??1?24???10??00000????????????4

?0??0024????00??20???3?30000???0?046?013000?0???????0????????????????????????????????40??12203121410

03000?46?1001010310435??????????????0?000?12?????????????????????33?000?01????21?4???????????????112

022??20???111??????????????????0??????2?00100???00?1?01???????????11????????????????????????????????

??????????????????????????????????????????0?00??0??0??0????1????????????????????????????????????????

????????????????????????????????????????011???0????????02?4????00?01{01}?21???12200??011001?20100?10???

???????

Lambdopsalis 1?112?10????0230214?1111411?1120151{34}{12}40010003123?1000000003102111???1??1?24???10??00000????????????4

?0??0024????00??20???3?30000???0?046?013000?0???????0????????????????????????????????40??12203121410

03000?46?1001010310323??????????????0?000?12?????????????????????330000101????21?4???????????????112

022??20111111??1??111000?1??11?1?1?110211010001?00010{01}110?110???????2????????0?11111?1?0??01?00????1

?0?0?01??211?????????????0????????????????0001010110?000131111?13?0000000?0?151???11{01}00212?01?111?10

000000001?00??114??121?4211????????2{12}12011111101121?1010204?11010201{01}02121?1220020021011?20100?101??

??????1

Sphenopsalis ??????????????????????????????2????????????031?3?1???0????310211????1????24???10??0000?????????????4

?0??0024????00??20???3?30000???0?046?013000?0???????0????????????????????????????????40??12203121410

03000?46?1001010310{12}13??????????????0?000?1??????????????????????330000101????21?4???????????????112

02???20????????????????????????????1??21???0????0001?0?????????????????????????11111110?110?1?0?????

?????????????????????????????????????????1????????????????????113??00???????????????????????????????

?????????????????????????????????????????11???????????????????????????????????0????????????????2????

???????

Ornithorhynchus 1?1?2?1{01}001002302141111141111200011331112111{02}105??????????4?????1???1????35???1???0?????????????????

??????35????00????????????????????57?20?????1???20?111?????0??0??????????????????????40????????1????

??????4????????214???0???11???1?????2?010?0?3230422121??0????2?23?3???????01?0????????2??1???2?????0

?2?????11110111101000010001000001010000000000012000100110000?1001011211111000110?00?0002110110021000

0?0000000101100000000000110000110100?110{01}10021110010?00023?11111411000000010111011020001112010110110

0000000000?00?0?32312114211010?1??122010??1111301101?000224?0011021121202011220100121101?2?000?10000

2111221

Tachyglossus 1?1?2?10???00240214111114000?00000133111??1?0105??????????4?????1???1????35???????0?????????????????

??????35??????????????????????????57??0?????????????????????????????????????????????????????????????

??????4?????????????????????????????????????????????????????????????????????????????????????????????

???????11110111101000010001000001010000000000012000100110000?1001011211111001110?00?0002110110021000

0?0000000101100000000000110000110100?110{01}10021110010?00023?11111411000000010111011020001112010110110

0000000010?00?0?32312114211010?1??122010??1111301211?010224?0011?21121202111220100121101?2?000?{12}0010

2111221

Asfaltomylos 010121112110000021???001400112000013310120010?0???????????????????????????????????0?????????????????

??????2?????00?????110100??????0?0?????????????????????????????????????????????????????????????123??

?????????0?????224???0123?002?13?02100000??121202211311000010111211???????01?0???21?1?1?102??00000??

0????20?????????????????????????????????????????????????????????????????????????????????????????????

????????????????????????????????????????????????????????????????????????????????????????????????????

????????????????????????????????????????????????????????????????????????????????????????????????????

???????

Ambondro ??????1????00????1??????????????0?????0???0?0?0???0???????????????????????????????0?????????????????

??????2?????00??00?121300?110??0?0?????????????????????????????????????????????????????????????123??

?????????0?????224???01230001?13300120100??12120222131100010?111211???????01?0???21?1?1?1020100000??

0????20?????????????????????????????????????????????????????????????????????????????????????????????

????????????????????????????????????????????????????????????????????????????????????????????????????

????????????????????????????????????????????????????????????????????????????????????????????????????

???????

Ausktribosphenos 010100112010000021???11140011200001??1012001010???????????????????????????????????0?????????????????

??????2????000??00?12130001101?0?0?????????????????????????????????????????????????????????????123??

??????31?0?????224???01230001213300120100?01322022113111011?2212333???????01?0???22?1?1?1122110000??

0????20?????????????????????????????????????????????????????????????????????????????????????????????

????????????????????????????????????????????????????????????????????????????????????????????????????

????????????????????????????????????????????????????????????????????????????????????????????????????

???????

Bishops 011?101120100?0021???111400112000013310120010?0???????????????????????????????????0?????????????????

??????20???000??00?1213000?101?0?0?????????????????????????????????????????????????????????????123??

??????3{01}?0?????224???01230001213300120100?11322022113111011?2212333???????01?0???22?1?1?1122110000??

0????20?????????????????????????????????????????????????????????????????????????????????????????????

????????????????????????????????????????????????????????????????????????????????????????????????????

????????????????????????????????????????????????????????????????????????????????????????????????????

???????

Teinolophos 1?1000112010023021??1111400112000?13310120010?0??????????????000????010?1?????????00??00????????????

??????21???100??00??0??00??0???0?0?????????????????????????????????????????????????????????????123??

??????1{01}?0?????224???01231001111200120010??1323042212111011??2?23?3???????01?0???22?1?2?1132020000??

0????20?????????????????????????????????????????????????????????????????????????????????????????????

????????????????????????????????????????????????????????????????????????????????????????????????????

????????????????????????????????????????????????????????????????????????????????????????????????????

???????

Steropodon 0111001????0??00?1?????????????????????????10???????????????????????????????????????????????????????

??????2????????????????00??????0???????????????????????????????????????????????????????????????123??

??????34?0?????224???01231002111200120110?01323042212111011??2?2333???????01?0???22?1?2?1132020000??

0????20?????????????????????????????????????????????????????????????????????????????????????????????

????????????????????????????????????????????????????????????????????????????????????????????????????

????????????????????????????????????????????????????????????????????????????????????????????????????

???????

Obdurodon 1?1?2?113010023021??11114111120001133111211101?5??????????4?????1???1????23???1?0000?0?????????????0

?0???023????00?????1013?0?00???0?044?20?????1???20?1??????????0???????????????0??????40????????123??

??0???34?0?????224???012311??111200120010?0?323042212111011??2?2333???????01?0???22?1?2?1132020000??

022??20?????????????????????????????????????????????????????????????21???1???1??????????????????????

?????????????????????????????????????????10021110110?00023?11111?????000001?111?11020001112010110?10

0000000000?00?0??????????1?0???????????0??????3012?1?0002?4?0?1102112120201122??00121101?2?0????0000

2????2?

Volaticotherium 1?112?1101000?1021??111141????000?13??0010010{01}1200010000002000000100000?021????00000?00?????00????00

00??0021???000??00?0200000000?00?032?20?00??0??000??10?????0?????????????????????????00?????????2???

??0???43?0?????200???000010011?0??4000000?01?00???00?{01}0????0?????00???????0100?????????0?????????0??

020??20?????????????????????0??0???????????0?{01}0???11?0000000?????011???????????0??000?00??1?1100?001

?????????????????????????????????000001101??????????????????????????????????????????????????????????

??????????????????????????????????????????????????????????????????????????????0??????????1??0???????

???????

Gobiconodon 1?1?1010???00{12}10213?1111412111001113140010010103000000000030001001000101021???000000?000????00????10

00??0021???000??00?10010001010?0?020?20?????0???00??10?????0????21???????????????????10????????122??

??0???1{01}?0?????200???000000?1100?10100001001000???00?00????0?????00?????????00???20?1?00??????0000?2

020??20?????010101000000?101121111?1101110000010100100100?00?000?0??210021100000?00100001100?000?000

0?00?000000010000000000000???????????0??100012020011?00023?11111{23}0100000001?121120020001111000110020

0000000011??1011?????????1?1?????12????0111111200211100021100000000011200111220121011001??00000001??

0??0?00

Repenomamus 1?1?1010???00210213?1111412111001113140010010112100000000020001001000101021???000000?000????00????10

00??0021???000??00?1101{01}001010?0?020?20?????0???00??10?????0????21???????????????????10????????122??

??0???22?0?????200???000000?1100?1110000100{01}000????0?00????0?????00?????????00???10?1?00??????0000??

020??20010000101010000001101121111?1101110000010100100110010?0???011210021100000?001000011000000?000

0?001000000010000000000000?0?0??0??0?010100012020011?00023?11111{23}0100000001?121120020001111000110020

000?000011??101?????????21?1?????12????0111111200211100021100000000011200111220121011001?20000000101

0??0100

Amphilestes 1?1?11?0???002102????11141211??0??1314002001010??????0??00???0?0????000?0??????00000?00????????????0

00??0022???000??00?11010000010?0?0???20?????0???00??10?????0???????????????????????????????????122??

??0???10?0?????200???00000001100?10100001001000???00?00????0?????00?????????00???20?1?00??????0000??

020??2??????????????????????????????????????????????????????????????????????????????0???????????????

???????????????????????????????????????????????????????????1????????????????????????????????????????

????????????????????????????????????????????????????????????????1?????????????0?????1???????????????

???????

Yanoconodon 1?1?1010???00210213?1111412111001?13140010000103000000000020001000000001023???100000?000????00????10

00??0023???000??00?00000000010?0?034?20?????0???00??10?????0?????1???????????????????0121??????121??

??0???33?0?????200???00?00001100?02000001211000????0?00????0?????00?????????00???10?0?00??????0000??

020??2?000000101010000?01101121111?1101110000010101100100?00?0001011210021?00000?001000011000000?000

0?000000000010000000000000?0?0?00??0?00?000012020?11??00???1????????????????????????????????????????

????????????????42312?1?21?????1?1221010111111?00??????0???????11?????2????1220????????????0????????

???????

Liaoconodon 1?1?1010???00210213011114121110014131400100001{01}211000000001000000{01}010001023????00000?000????00????10

00??0023???000??00?0000000001000?034?20?????0???00??10?????0????21???????????????????00????????122??

??0???23?0?????200???00000001100?0211000{01}?11000???00?00????0?????00?????????00????0?0??0??????0000??

020??20?11?111010?000????111121111?1101??000?01?101100100010?00010112100221000?0?001000011100000?000

0?0000??00?01?0??0?00??0?0?0?000?1?0000?000?12020011110{12}23?1111{12}{23}??00200????1??????????????????110??

00000???????10??413011?421?????10122101011111120????1??01?1????11?001?2????12?0???111??3?21000?00???

???????

Jeholodens 1?1?1010???00?1021??1111412???001?13140010000101000000000000001000000101023???100000?000????00????10

00??0023???000??00?01010000010?0?023?20?????0???00??10?????0????21???????????????????0121??????121??

??0???23?0?????200???00000001100?02000001211000???00?00????0?????00?????????00???10?0?00??????0000??

020??200?0000101020000?01101121111?11011100??01010110010000??0001011210021?00000?001000011000000?000

0?0000000000100000000000000000000100000?00001?02?011?00023?111?130100??0??10??1????????????????????0

??0?0?????????????????1??????????122????111??1?????????02?1?0??11???00?????1220???01??01???0????????

1??????

Jueconodon 1?1?1010???00210213?1111412111001413140010000103000000000020000001000101023???000000?000????00????{01}0

00??0023???000??00?0100000001000?034?20?????0???00??10?????0????21???????????????????00????????122??

??0???23?0?????200???00000001100?11000000?21000???00?00????0?????00?????????00???10????0??????0000??

020??20?11?11101??00?????11112121??11?111000001?1{01}0100120010?00010112100210??0?0??01000011100000?0??

????00000000??0????00??0?00??0??0000000?000?12???011??0?23?1?1??{23}?1??2?????????????2????????????????

????????????10???????????1????????2?????11111120?2??1??0???????11?001?????????0???12110??2??00?00???

???????

Chaoyangodens 1?1?1010???0021021??1111412??1001?13140010000100000000000000000000010011024????00000?000????0??????0

00??0024???0?0??00?01010000010?0?035?20?????0???00??10?????0????21???????????????????00????????122??

??0???24?0?????200???00000001100?1200000{01}231000???00?00????0?????00?????????00???10????0??????0000??

020??20?11?11001??1??????1111212???1??111000?01???1100100010?000101121002?0000?0???1000011100000?00?

????00?000001?0????00??0?00??0000?00000?000?12???011??0?23?1?1??{23}???????????????????????????????????

?????????????????????????1???????12?????111??12????????0???????11?????????????0???121?0?????0???0???

???????

Trioracodon 1?1?10?0???0021021???11141211100101314001000010?0?00?0??0?20000000000001021???10000??0000???0?????10

00??0022???000??00?01010000010?0?032?20?????0???00??10?????0?????1???????????????????0112??????121??

??0???32?0?????200???00000001100?1{02}000001211000???00?00????0?????00?????????00???10?0?00??????0000??

020??20?????????????????????????????????????????????????????????????????????????????????????????????

?????????????????????????????????????????0?????????????023??11?????????0?0?0??1010???0??????????????

??0??0???1??10?????????????0???????????0??????????????0?????????1????????????????0??????????????????

???????

Priacodon 1?1?1010???0021021???11141211100101314001000010?0?0???????20000000?00001121???10000????00???00????10

00??0022???000??00?00010001010?0?022?20?????0???00??10?????0????01???????????????????0112??????121??

??0???22?0?????200???00000001100?12000001211000???00?00????0?????00?????????00???10?0?00??????0000?1

020??20?????????????????????????????????????????????????????????????????????????????????????????????

?????????????????????????????????????????0????0????1??0023??1111301??00000101?13100??001111000??00??

000??0??1100101?????????2??0???????????0??????20??????002???????1???????{12}??122??10????????????0??0??

1??????

Tinodon 1???11??????0{01}1021???11??1210?00????04?130?00?0?????????????????????01???2????????0?????????????????

??????22????00??00?010100000?0?0?0???20??????0??10?????????0????00???????????0????0?01?????????122??

??????22?0?????223???0012000110001010000100101200001000????0?0??0{12}2?????????00???2101?00??????0000??

020??20?????????????????????????????????????????????????????????????????????????????????????????????

????????????????????????????????????????????????????????????????????????????????????????????????????

????????????????????????????????????????????????????????????????????????????????????????????????????

???????

Akidolestes 1?????10???00?20????11114121110010131401100111010000?0?00?00001001000111020???100000?00000??0?????10

00??0020???000??00?11010000012?1?010?20?????10012??110?????0??0?000?????????000?000?0?121??????122??

??0???00?0?????224???0113000110001000000130022300?01000????0?0??0{12}2?????????00???2101000??00000000??

020??20??????0011?0000001101121111?110111011111011110010011100001?11211112?01011??0?0000111001021001

0?0000001002010010011000010000121000?011110?1?020??1???????1????????????????????????????????????????

?????????????????????????????????????????11111?????????0???????10?0???2?????120?????1?0????0????????

???????

Spalacotherium 1?1?1010???001202????1114??11100101314011001110??0?????0?????010????010?02?????0??00?00000??0?????1?

00???020???000??00?11010000010?1?00??20?????110020?110?????0??0?000?????????000?000?01121??????122??

??0???00?0?????224???011{23}000110001000000130021300?01000????0?0??0{12}2?????????00???2101000??00000000??

020??20??????????2??????????????????????????????????????????????????????????????????1???????0???????

????????????????????????????????????????????????????????????????????????????????????????????????????

????????????????????????????????????????????????????????????????0???????????????????????????????????

???????

Zhangheotherium 1?1?0010???00220213?1111412111001{12}131411010111020000?0?00010001001000101022???100000?00100??01????10

00??0022???100??00?110100001?1?0?000?20?????110021?110?????0??0?000?????????000?000?01121??????122??

??0???01?0?????224???0112000110001000000130021200?01000????0?0??0{12}2?????????00???2101000??00000000?2

020??20?11100001121100001101121111?1101110111110111100100110?0001011211122100001??1?110011100100?001

0?0000001302010010011000010000020000001111??12020111??0023?111112????110101?1?1?10???0???12010111020

000000001?0?11?1????????21???????1?????0?11111???????0??1??????10???0???2???120??2??1?????00?0??????

???????

Maotherium 1?1?0010???00?202???11114121110012131411010111020000?0?00010001001000101022???100000?00100??01????10

00??0022???100??00?110100001?1?0?000?20?????1100211110?????0??0?000?????????000?000?01121??????122??

??0???00?0?????224???0113000110001000000130021200?01000????0?0??0{12}2?????????00???2101000??00000000??

020??20?11?000011?11000011011211?1?1101110111110111100100110?0001011211122?00001??1??100111{01}?100?001

0?00000?13020100???1100001000002{01}0000011110?1?020111??0123?111112????110101?1???10?100??11000011??20

000000001???11???????????????????12????0?1111?201??2?0?0??20???100000???2???120?02?1??0??200????????

1??????

Origolestes 1?1?0110???002202130111141211100111314110101110300000000002000{01}001010101022???100000?00100??01????10

00??0022???000??00?110{01}000011100?02{12}?20?????1100211110?????0??0?000?????????100?000?01121??????122??

??0???10?0?????224????11{23}000110000000000{01}30021{12}0??01000????0?0??0{12}??????????00???{12}10?010???0?00000??

020??20?11?10001121101??11?10101?1?1?0{12}11010011?11110010011100001011211???1000?1?01?11001?10000??001

0???000013021{12}1110?110000?00?00200000011011?12?2?111010?23?111112000111??01?1?11????????1??????110??

00000000?1??21??413?1114213111100121101??11111????1????0110010010100011????01201?2121001?20100?00111

1001{12}?1

Anebodon 1?1?0110???0022021??111141???10??2??1???01011101?000???0001000000101010?020????00000?00100??00????10

00??0022???000??00?1100000011110?031?20?????1100111110?????0??0?000?????????000?000?01121??????122??

??0???21?0?????224????11{23}00011000{01}0000000?002110??01000????0?0??0{12}??????????00????10?0?0???0?00000??

020??20?????????????????????????????????????????????????????????????????????????????????????????????

????????????????????????????????????????????????????????????????????????????????????????????????????

?????????????????????????????????????????1111??????????02?{01}?????0?000?1???????0????2??01?20?00?001??

???????

Lactodens 1?1?2010???0022021??111141211100121314012001110200000?0000100000010101{01}?022????00000?00000??0{01}????10

00??0021???000??00?1100000011110?000?20?????11000???10?????0??0?000??????????00?000??11????????122??

??0???00?0?????224????113000110001000000??002120??01000????0?0??0{12}??????????00????10?0?0???0?00000??

020??20????10????????????????????????????????????????????????0???011????????????????????????????????

??????????????????????????????????????10?????????102010????1????????????????????????????????????????

?????????????????????????????????????????11????????????????????10?????????????0?????1???????????????

???????

Kiyatherium 1?1?0110???0022021??1111412111001?1314110101110???????????1000000100010?021????00000?00{01}00??01????10

00??0022???000??00?110?0000?11?0?021?20?????1100111110?????0??0?000?????????000?000?0112???????122??

??0???21?0?????224????1120001100010000000?002110??01000????0?0??0{12}??????????00????10?0?0???0?00000??

020??20?????????????????????????????????????????????????????????????????????????????????????????????

????????????????????????????????????????????????????????????????????????????????????????????????????

????????????????????????????????????????????????????????2?{01}?????0???????????????????????????????????

???????

Dryolestes 1?1?10111100012021??11114111110?011313012001110100?0?0?3??00001000000001021???100000?00000??01??1010

00???021???000??00?000000001?0?0?000?20?????100010?0?0?????0??0?000?????????0001000?02121??????123??

??0???00?0?????224???01230001200002000000?0021100001120????0?0??122?????????00???2101000?002000000?2

0210020??????????????????????????????????????????????0?000??????????????????????????????????????????

?????????????????????????????????????????1?????????????????1????????????????????????????????????????

????????????????????????????????????????????????????????1????10?0?????????????????????????00????0???

???????

Henkelotherium 1?1?10111100012021??111141111101??1313012001110???00????0???00?0000?00??021????00000?00000??0???0010

00???021???000??00?0000000?0?0?0?000?20?????100010?0?0?????0??0?000?????????0001000?02121??????123??

??0???00?0?????224???01230001200002?00000?0021100001120????0?0??122?????????00???2101000?002000000??

021002????????011?110?0???01121111?11?111011?100111?0010012100001?1121?022200001?11?000011110000?10?

????????1???????????????????????0????0??111?12020?11?00?23?1111?3??????????????????????????????????0

?????????????????????????????????????????11????????1??????2?0001???1?????????200????????????????????

???????

Amphitherium 1?1?11111100012021??11114111110?011303012001110?0?????????0000??????00????????????00?0011????0??????

?????020???000??00?00000??01?0?0?00??20?????10001110?0?????0????000?????????0001000?011????????103??

??0???00?0?????224???01{12}30001001002000000?0011100001110?0??0?0??122?????????00???21011100000000000??

02???2??????????????????????????????????????????????????????????????????????????????????????????????

????????????????????????????????????????????????????????????????????????????????????????????????????

????????????????????????????????????????????????????????????????????????????????????????????????????

???????

Vincelestes 1?1?2?1111000{12}2021??1111411101010113130120011101{01}0?00003002000000001000?023????00000?00000???0??0?10

00??0023???000??00?100000000?0?0?034?20?????100010?111????00????01000??0?0??0001012001001??????123??

??0???33?0?????224???0112000100000200000010011100001110????0?0?0111?????????00???210100??000000000??

02101200011110011?1101?1?101?21101?110111010100011110010?0?0?0001???210122200001?11?000011110000?102

0?00110013020101100110100??0???210???0??011122020011?00123?1?112400?111010101110100200011{01}2011111020

1100000011002111?????0??21?01??????????0?11111101101?00010200100000101200010020020001011?200000000??

1?????1

Nanolestes 1?1?10111100012021??111141111?0??113030120011101?0????????0??0?0???0001?0?????????00??????????0?03??

?????0?0???000??00?000000000?0?000???20?????100011?1?0?????0??0?0000????????1012012001121??????123??

??0???21?0?????224???0123000100100210000110?11200001110?0??0?0?0111?????????00???21011100000000000??

021002??????????????????????????????????????????????????????????????????????????????????????????????

????????????????????????????????????????????????????????????????????????????????????????????????????

????????????????????????????????????????????????????????????????????????????????????????????????????

???????

Peramus 1?1?11111100012021??111141111101011303012001110???????????1????0??00000?021{01}?0??0000?0?{01}10?010100310

00??0020{01}00000??00?000100000?0?00031{01}20?????1000211?10??0?00??0?0000?00?????0001002001121??????123??

??0???{23}1{01}0?????224???01{12}20001001000100001100111{01}000111110??1?{01}?0111?????????00???21011100000000000??

021002??????????????????????????????????????????????????????????????????????????????????????????????

????????????????????????????????????????????????????????????????????????????????????????????????????

??????????????????????????????????????????????????????????????????????????????0?????????????????????

???????

Sinodelphys 1?1???110101004021?1111141110101031303012001110100000001000000000000000?0201001?000??00?1???22?11210

00??0021110200??00?11010????1{01}?0?031120?????10??211111?21??0?00?11???11??????0??110?02121??????123??

??0???3210?????224???0?2300?110?1?01?0001?31212?211141100?02????1?????????0100????201??1?01?000000??

021?120??????001??1?01???101122101?11?2?111??2??22110011??2??110001121?????0???0??01??????100000?012

1?011??1??1202011?1?2????110110210000010011???????1????????1????????????????????????????????????????

?????????????????????????????????????????11???2????????02??????10?0???2????0??0?????1?0?????0???????

1??????

Ambolestes 1?1?2111110000402141111141{01}1010?0213030{01}20011?????0??????0???0??0001?????201-010000??00111?022?11210

00??002111?100??00?1101000001100?031120?????1020211111221110?00111001111?1??1011110?02121??????123??

??0???3210?????224???012300011011011?0001?212120{23}{01}1141100?02?100111???????0100????201??1?011?00000??

0210120????11001??1101?????112{12}101?1102???1??21?22?1?011???1011000112?1????0???1??1101001?111000?0?2

?????11??????????????????????0??1??001??0?????????11????????????????????????????????????????????????

???????????????????????????????????32120?11???21????????2???????0?????????????0?????1???????????????

???????

Kielantherium 1?1?10?10100013021??111141110101021300012001110???????????0000000001000?021000100000?00????010??1310

0???0021000000??00??????00???200?021020?????1000210111010000?00011000000?0??{01}010000?0{12}12???????123??

??0???210??????224???011300021001001000011311110211111100?00?0?0111???????0100???22011100?10?00000??

021?120???????01????????????110???????2???1??2????????1????????????????????????1??????????100000?0??

?????????????????????????????????????????1??????????????????????????????????????????????????????????

??????????????????????????????????????????1?????????????????????0????????????????????????????0??????

???????

Jeholotherium 1?1?20?11100024021411111411101010{23}1303012001110000000000000000000001011?{01}20100100000?00110?021111210

00??0020100000??00?11110000011000031120?????1020211111121110?0011100111101001011{01}00?02121??????123??

??0???311??????224???012300022001001?000113111202111311102020100211???????0100???22012110010000000??

021012011111?001??1??0???1??110????1??2???1??21????1??10?????????01?2??????????10?010?????100000?00?

?????????????????????????????0?2?00000??01?1?????????????3??1???????????????????????????????????????

??????????????102?3?1????????????????????11?????????????2?1?1?010?0???????????0????01?0??2?100??????

???????

Acristatherium 1?1?2????????24??1??11114??101000?130?011001110100000000001000000000000?020100100000?00110?021111110

00??0020100{01}00??00?111100?0011000031120?????1020211111121110?0011100111101001011110?02121??????123??

??0???311??????224???012300022001001?000113111202111411000020100211???????0100???22012110011100000??

0210120?????????????????????????????????????????????????????????????????????????????????????????????

????????????????????????????????????????????30?????2??????????????????????????????????????????0?????

??0??????????????????????????????????????11?????????????2?0?0?11???00??????0??0???001100?20100??0???

???????

Cokotherium 1?1?20?1110001402141111141110100021300012001110100000000001000000000000?120100100000?001110121101210

00??0020100000??00?11110000011000031120?????1021211111121110?0011100111101001011010?02121??????123??

??0???311??????224???0123000220010011000113111202111411000020100211???????0100???22012110010100000??

0211120???????01??1?????????1?????????2???1???????????11??????????????????????????????????????0?????

????????????????????????????????????????????30?????2????????????4?????????1?1???2?????????????0?????

1001??????01???0?????????????????????????11?????????????2?????01????0??????0??0???001?01?20100??0???

???????

Microtherulum 1?1?2?111100024?21??111141110101021300012001110000000000001000000000000?120100100000?001110120111110

00??0020100000??00?11110000011000031120?????1030211111121110?0021100111101001012010?02121??????123??

??0???311??????224???012300022011001?000113111202111411000020100211???????0100???22012110012100000??

0210120111?1?001??1??0???1??1?????????2?????????????????????????????21?????0???10?110?????101000?01?

????????2????????????????10000021??0011?01??2?????12?????3??1?12?????2??????????????????????????????

0?0?????1???111?213?1?1??122???1???321?0?11?????????????????????0?011??????0220?????1?00?201000?????

???????

Eomaia 1?1??1111100011021??111141110101021303012001110000000000000000000000000?020100100000?00101012111?110

00??0020100100??00?12010000011?00031120?????1020210?11?211?0?001?????11??1??????????02121??????123??

??0???3110?????224???0??20001?0?101110001131??202?11411000?201??211???????0100???2201211001???0000??

021?1201?1?11001121101?0?101122101?110211011120022110011012100001000211122200001??1?011011111000?012

2?000112230201013111101000001002100001?10111??1????2??0????1?1??51?11?????????1?????????????????????

????????11?????????????????????????????0?11????????????02???0??10?0???2???10?200????1?03???10???????

1??????

Juramaia 1????-???1000???????11114??10101021?0301100111000000???00000?0000001000?020100100000?001010020101110

00??0020100000??00?12010000?11?00031120?????1030211111121110?0011100111101001011010?02121??????123??

??0???3110?????224???0?1?00?1??????110?01131?1??2?11411000?2????211???????0100???2201211001?100000??

021?12?1?1111001??1????????112210??11?21?01????02211001???2?00???0??????????????????????????????????

????????????????????????????????????0???????????????????????????????????????????????????????????????

?????????????????????????????????????????11???????????????????????????????????0?????????????0???????

???????

Prokennalestes 1?1?11111100011021??111141110101021303012001110?0?0??????????0?0??01001?020100100000?001{01}1112???1110

00??0020100000??00?12020000011?0003{12}120?????1020210111{12}21120?00111001111111{01}1011{01}10?02121??????123??

??0???3110?????224???0123000120110111000113111202111411000020100211???????0100???22012110012100000??

0211120?????????????????????????????????????????????????????????????????????????????????????????????

????????????????????????????????????????????????????????23??111251111110{12}0102?10?????11??1?011101???

11001???110?21??????????2??1?????????????1??????????????2????????????1???????????1??????????????0???

???????

Kennalestes 1?1?2?111100014021??111141110100021???0?20011101?000???0??1??00000010011121110100000?001111120???210

00??002{01}110100??00?1002000001000?032120?????1020211111221120?0021100111101011010000?02121??????123??

??0???3210?????224???0123000220210211000113132303111411000020100211???????0100???22012110012100000??

02111200?1??????????????????????????????????????????????????????????????????????????????????????????

???????????2??????????????????????????????112?122112210223??1112511??21021002{34}1?2001011???????101020

1000110011002110????????21?2???????32130?11????01102?000202?00??0?010121211002?022011103?201??0?00??

1011221

Asioryctes 1?1?2?111100014021??111141110100021303013001110000000000000000000001001?121110100000?001111220???210

00??0021110100??00?1102000001100?032120?????1020211111221120?0021100111121201001000?02121??????123??

??0???3210?????224???0123000220210211000113111303111411000020100211???????0100???22012110012100000??

02111200?1111??11?110????????????????????0?????0????0????0?111000????????2??00?????????0???1?000?012

2?00?112230201013111101000000?020000?1??011122122112210223??11125?1??210210?241?2001011????011101020

1000110011002110????????21?2???????32130?11111201102?000202?00?101010?212110020022011103?201000000??

1011221

Ukhaatherium ??1?2??11??00?40?1??11114??1010?021???0??00?1100?0000003000000000000000?121110100000?001111220??1210

00??0021110100??00?1102000001200?032120?????1020211111221120?0021100111121201001000?02121??????123??

??0???3210?????224???0123000220??02110001131113031114110000201?0211???????0100???22012110012100000??

0211120??1??1?011?110?????0?122101?11?2110111200221100121?21100?1???210?22200001??1?011011111000?012

2?00111223020101311110100000???200???1???1???21?2??221???3???????????2??2????4?0???10?????????1?????

?0?0?1??????21?1???????????2????????21?0?11111?0??????0?????????0?010???21??0?0??????????2??00?0????

???????

Zalambdalestes 1?1?2?1111000{12}4021??11114111110{01}021303012001110{23}{01}000?00000111{12}100001010?12{12}110100000?001111221??1210

00??0021110100??00?1112000001200?03{23}120?????1020201111221120?0031110111121210000000?02121??????123??

??0???3210?????224???0123100220320211000113132304201411001020110211???????0100???22012110012100000??

0211120???1110011?110?????01?22101?11?21101112002211011?0121100010??211122200001??1?011011111210??12

2?00111223?201013011300000000002000001??011132122112210223?111125?1??210210024112001011????011101020

1000110011002111????????21?2???????32130?11111201102?000202?01?1010101211110{01}20021011003?201000000??

1011221

'Uchkudukodon (Daulestes)' 1?1?2?111100024021??111141110100021303012001110??000?0????0000000000010?021110100000?00???112???1210

00??0021110?00??00?1?1?000??1000?032120?????1020201111221120?0021100111111111010000?02121??????123??

??0???3110?????224???0123000{12}20210211000113121302111411000020100211???????0100???22012110012100000??

0211120?????????????????????????????????????????????????????????????????????????????????????????????

??????????????????????????????????????????112?120112010223?11112511???10????2?????01011?????????1?20

1100??001????????1??????2??1???????3???0?11111?01?1???002?1?00?10?000?212110{01}200???1??0??2??00??00??

2??????

Aspanlestes ????2?1?????0??0?1???11????????1??????0???0?1????????????????0?0????????02?1??1?0000?00111112?111210

00??0020100?00??00?1001000001?001031120?????1031201111221130?0031110311121211010000?12121??????123??

??0???3110?????224???012310?110210211000113121301211411000020100211???????0100???22012110012100000??

0211120?????????????????????????????????????????????????????????????????????????????????????????????

?????????????????????????????????????????????????????????3???????????1?0??1????0?????1??????????????

?00?1????????1?????????????1?????????????1??????????????2???????????????????????????????????????????

???????

Cimolestes 1???2?10?10?024021??111??1110100?21303012?01110???????????1000?000?0000?0211101???00?00101122???1210

00???021110000??00?1101000001100?032120?????1031211111221120?0021100111111110000000?02121??????123??

??0???3210?????224???0123000120220211000113131303111411000020200211???????0100???22012110012100000?2

0211120?????????????????????????????????????????????????????????????????????????????????????????????

????????????????????????????????????????????????????????????????????????????????????????????????????

0???????????????????????????????????????????????????????????????????????????????????????????????????

???????

Gypsonictops 1???2?10?100024021??111??1110100?21303012?01110??????????????0?000?0000?0211101?0000?00111122???1210

00???021110000??00?11120000011001032120?????1031211111221120?0021100111111110000010?02121??????123??

??0???3{12}10?????224???0123100120220211000113131304111411000020200211???????0100???22012110012100000?2

0211120?????????????????????????????????????????????????????????????????????????????????????????????

????????????????????????????????????????????????????????????????????????????????????????????????????

????????????????????????????????????????????????????????????????????????????????????????????????????

???????

Protungulatum 1?1?2?101100024021??111??1110100021303012001110???????????????0000?0000?0211101???00?00101121?????10

0????021110000??00?121100000?100?032120?????104220?111221230?0031110311111100000000?12001??????123??

??0???3210?????224???0123100{12}10210211000113121301211411000020201311???????0100???22012110012100000?2

021?120???????????????????????????????????????????????????????????????????????????????????????????22

2?03?1122312?101311132011???????????????????????????????23??11125?1??1?0??00??{01}0?????1??????????????

11001????1??21?????????????2?????????????????????????????????????????????????????1??????????????????

???????

Leptictis 1?1?2?111100024021?1111141110100021303013001110200000000001000000000010?021110100000?001111221??1210

00??0021110000??00?1212000001000?032120?????102220?111221220?0021100111111110000000?12001??????123??

??00??3210?????224???0123100110320211000113121304111411000020101211???????01?0???22012111112100000?2

0211120?1?????011?1101?0?101?22??1?1?12110111200221100110?211????011211122?1?001?11?011111211210?122

2?03?1122312010131113201100???0200?001???11132121112010223?1111251111110210023113001111????011101020

1100110011002110?????1?421?2???????32131?11111211112?000203?0001011011212111020021011103?20100000012

2011221

Erinaceus 1?1?2?1111000241214111114111010002130301300111020{01}000000002000{01}001000101022110100000?001011111??1?10

00??0023110000??00?1212100001000?032120?????102020?111221230?0031110211?????0000000?12001??????123??

??00??3310?????224???012310011032021100011012130221141100?020211233???????01?0???22012111112100000?2

021?120111111001121101?0?11112{12}101?11121101112002211011201211000101121112221?001?11?011111101210?122

2?03111225120101311132011000000200100111011130121112010223?1111251111210210023113001111????011101020

110011001100211121312114212211111?142130?11111211113?000202?001101101121211?220121011103?21100002012

2011221

Holoclemensia ????2????????????????11???????????????????0?1???????????0????????????????2?0??????00?00????01?????10

0????02?1???00??00??????0??????0?0??020?????101020?211221020?0021100011101001001212112121??????123??

??0?????10?????224???012300??20110211000111121202111411000021100111???????0100???22012110010000000??

0????20??????????????????????????????????????????????????????????0??????????????????????????????????

????????????????????????????????????????????????????????????????????????????????????????????????????

??????????????????????????????????????????1?????????????????????????????????????????????????????????

???????

Liaodelta ?????????????????????????????????????????????????????????????????????????2?0??1???00?00????01??????0

0???00????????????????????????????2?02??????101021111112{01}{01}10?00111000??0?0??0002000?{12}{23}12?????????3??

??0?????0?????????????????????????????????????????????????????????????????????????21????????????????

?21?1???????????????????????????????????????????????????????????????????????????????01{01}???????00?01?

????????2????????????????????0?????00???0???3????112?????3??1112?????1??????2?1?????????????????????

????????????????????????????????????????????????????????????????????????????????????????????????????

???????

Deltatheridium 1?1?2?113101022021??11114111010004130301300111010000?0??0?00000000000002022001110000?00????011??0010

0???0022001100??00??????10???000?022020?????1010211211{12}21010?00111000111{12}1{12}01002001022121??????123??

??0???2200?????224???0123000100110{02}11000111121202111411{12}0002{12}100111???????0100???22112110010000000?2

021?120???????????????????????????????????????????????????????????11??????????????????????????????12

????1???2??????11212???00????????????????111?2020112????23?11112510??11010212312???1011????1??101?2?

00001???1101111?????????2??1???????????0?1111?2?11?2??002?2?01010?000121???0{01}20031????03??01001000??

???????

Sulestes 1?1?20113101022021??111??1110100141?1?01310111??????????0?????????????0??220011???????0????011?????0

0???0022001100??00??????10???000?022020?????1010211211{12}21010?0011100011111101002001022121??????123??

??0???2200?????224???01230???00210011000111121212111411{12}0002{12}211211???????0100???22112110010100000??

021?120?????????????????????????????????????????????????????????????????????????????????????????????

????????????????????????????????????????????????????????23??1112510??1?0???12?1?????????????????????

000??????1?1?????????????????????????????11????????????????????????????????0?20?????????????00??0???

???????

Asiatherium 1?1?1?113101024021??111141110100141?0?013001110???00?0??0?????0?0000??0??22001?00000?00????011??0010

0???0022001100??00??????10???000?022020?????1020210211{12}21030?00211112111111?0001011012121??????123??

??0???2200?????224???0123001110310211000111121212211411211021211211???????0100???22012110012100000??

021?120?????100112110?0????1123101?11?211011120022111?1???2111110???210122?00001??1?011010100100?01?

????????2???????????????????????????00??011132020112010?23?111125????11110??23??4101011???????101?2?

?0?0101111???11?????????2??????????????0?1111?2011?2??00??2?1??10?0?0?2????0{01}200???1100?????00??10??

2??????

Kokopellia ??1?1?11310?022??1??111??1?10100?{34}1?????3?01110???????????0??00000?0000?0????11???0?????????1???????

?????022001100??00??????1????000?02??20?????101021?211221030?00111001111111?1002001012121??????123??

??0???2200?????224???01230??110210211000112111212211411{12}10021210211???????0100???22012110012100000?2

021?120?????????????????????????????????????????????????????????????????????????????????????????????

????????????????????????????????????0???????????????????????????????????????????????????????????????

????????????????????????????????????????????????????????????????????????????????????????????????????

???????

Didelphodon 1?1?2?113101021021??11114111010014131301?001110???00???000?????0??0?000?0220011?0000?00?????1???0010

0???0022001000??00??????10???000?022020?????1020211211221030?0032210211011101002011022121??????123??

??0???2200?????224???01230??100320211000112121212201411211022211211???????0100???22011110012100000?2

021?120????????????????????????????????????????????????????????????????????????????????????????????2

1?01?10123110101121221011??????????????????13?020112010223??1112??0????1?0?1??11?????1????????1????0

?00?1?????0111???????????1?1???????????0?11?????????????????????????????????0?0??1??????????00??1???

???????

Mayulestes 1?1?2?113101024?21??111141110100141303013001110000000001000000000000000?022001110000?00????011??0010

0???0022001000??00??????10???000?022020?????1010211211221030?003220021111?100001011022121??????123??

??0???2200?????224???01230???10320211000112121212211411211022110211???????0100???22011110012100000??

021?1201?11110011?1101?1?101123101?1112111111200221110110?211?1??011211122200001?11?011010110000?012

????????24220201121211011??????210???0??011132020112011123?111125????11010??24110101011???????101021

0010100111111111????????21?????????????0?11111201102?000202?110101000?2010100200??011003?211001100??

2??????

Pucadelphys 1?1?2?113101024021??1111411101001413030130011100000000010000000000000002022001110000?00????011??0010

0???0022001100??00??????10???000?022020?????1010210211221030?0032211211111110002121112121??????123??

??0???2200?????224???0123101120320211000111121212211411211022210211???????0100???22011110012100000??

021?1201?1111001121101?1?101123101?111211111121022111011012??????011211122200001?11?011010110000?012

1?01110124220201121221011?101?0210???0??011132020112011123?11112511??110102124110101011???????101021

0010100111111111????????21?1???????2???0?111112011?2?000202?1101011101201010020031011003?201001100?2

1??????

Andinodelphys 1?1?2?113101024021??111141110100141303013001110000000001000000000000000?022001110000?00????011??0010

0???0022001100??00??????10???000?022020?????1010210211221030?0032211211111110002121112121??????123??

??00??2200?????224???01231???20310211000112121212211411211022211211???????01?0???22011110012100000??

021?120???????0???????????0????????????????????????????????????????????????????????????0????????????

????????2????????????????????????????0???1113??20112011223?111125????110102?24110101011???????101021

001010001111111?????????21?1???????????0?111112?111??100202?1?01011001201?10020031011003?20100111??2

1??????

Didelphis 1?1?2?113101024121411111411101001413030130011100000000010000000000000002022001110000?00????011??0010

0???0022001100??00??????10???000?022020?????1010210211221030?0032211211????00002{01}11122121??????123??

??00??2200?????224???0123001120320211000112121212211411211022211211???????01?0???22011110012100000?2

021?1201111110011?1101?1?101123101?11121111112{01}022111012012112110011211122200001?11?0110101100000012

1?01110124220211121232011110110210010011011132020112011123?111125111111110212311{01}101011???????101020

000010111101111121312114212111111?022120?11111201112?100202?1001011001201010020031001003?21100111012

1011221

Marmosa 1?1?2?113101024121411111411101001413030130011100000000010000000000000102022001100000?00????011???010

0???0022001000??00??????10???000?022020?????1010210211221030?0032211211????00002111112121??????123??

??0???2200?????224???012300?120320211000111121212111411211022212211???????0100???22011110012100000??

021?120111111001121101?1?101123101?111211111120022111011012112110011211122200001?11?0110101100000012

1?01110124220211121222011110110210010011011132020112011123?1111251111111102123111101011???????101020

000010111101111121311114212111111?022120?11111201112?100202?1001011011201010020031121103?21100111012

1011221

Caenolestes 1?1?2?113101024?21411111411101001413030130011101000000020000000000000002022001100000?00?????1????010

0???0022001100??00??????10????00?022020?????1010210211221030?0032211211????00102101012121?????0123??

??0???2200?????2?4???012300?120320211000111121213211411211022212211???????0100???220111100121?0000??

021?120111111001121101?1?101123101?111211111120022111011012112110011211122200001?11?011010110000?012

1?021?01242201011212210111100002101000110111300201120?1123?1111251111111302?23110101011???????101020

00000021110111112131?1?4211111111?032120?11111201113?100202?1?01011?01201010020032??1003?21100?22012

1???221

Dasyurus 1?1?2?113101024021411111411101001413030130011101000000010010000?00000002?23001110000?00????011??0010

0???0023001000??00??????10???000?023020?????1010211211221030?0032211211????00102101022121??????123??

??0???2200?????224???012300?120320211000111121212211411211022212211???????0100???22011110012100000??

021?120111111001121101?1?101123101?111211111120022111011012112110011211122200001?11?011010110000?012

1?121101251001012213?1011110000210100011011132020112011323?1111251111111302123101101011???????101020

00001021110111212131?1?4211111111?042120?11111201111?110202?1101011011201010020032011003?21100111012

1011221

;

End;

**Results of Phylogenetic Analyses**

**Strict consensus tree (TNT New Technology Search)**

**
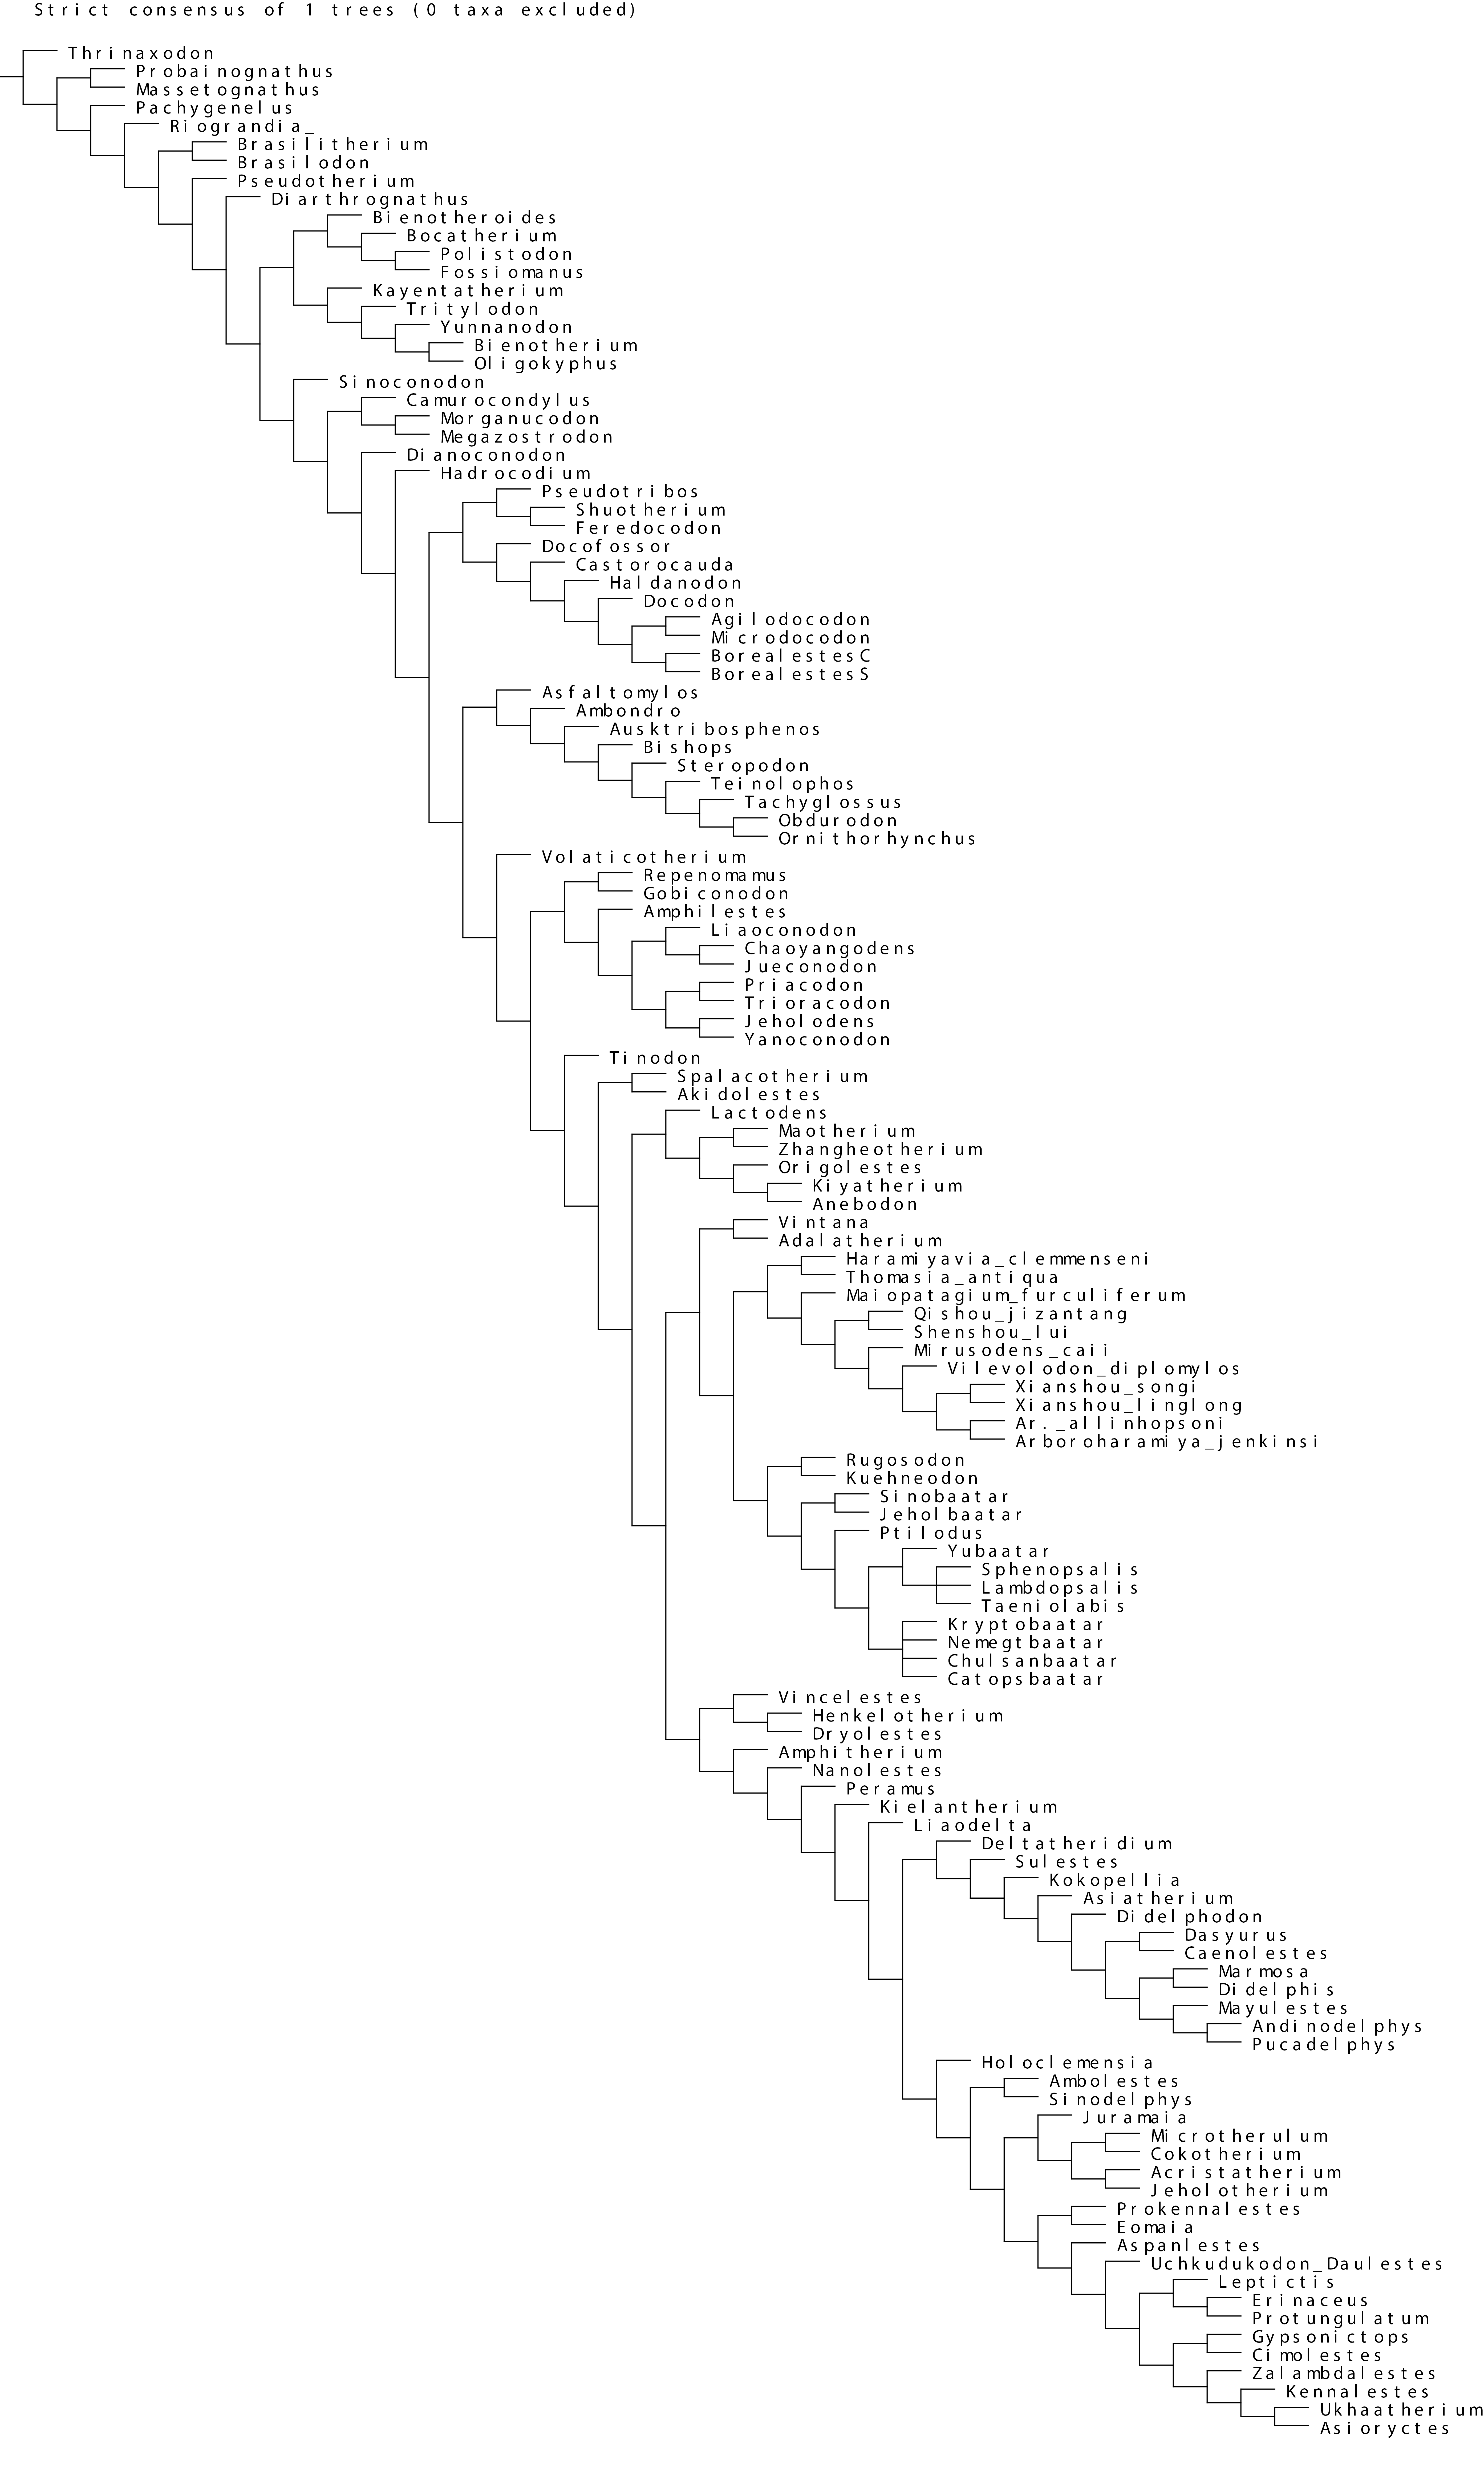
**

In the parsimonious analyses using PAUP* (Version 4.0; Swofford, 2002) the heuristic search settings were as the following: Optimality criterion is parsimony. All characters unordered with equal weight; gaps treated as "missing"; multistate taxa interpreted as uncertainty; starting tree(s) obtained via stepwise addition; addition sequence set as random; number of replicates = 100000; starting seed generated automatically; number of trees held at each step = 1; tree-bisection-reconnection (TBR) with reconnection limit = 8; steepest descent option not in effect; initial 'Maxtrees' setting = 1000 (auto-increased by 1000); branches collapsed (creating polytomies) if maximum branch length is zero; 'MulTrees' option not in effect; only 1 tree saved per replicate; no topological constraints in effect; trees are unrooted. Number of best trees retained is 1255, of which the strict consensus is presented below (Extended Data Fig. 10). We also calculated the 50% majority-rule consensus based on the 1255 best trees (Extended Data Fig. 10).

**50% Majority-rule consensus of 1225 trees (PAUP)**

/---------------------------------------------------------------------------------------------------------------------------------------------------- Thrinaxodon(1)

|

| /------------------------------------------------------------------------------------------------------------------------------------------------ Massetognathus(2)

| |

| | /-------------------------------------------------------------------------------------------------------------------------------------------- Probainognathus(3)

| | |

| | | /---- Oligokyphus(4)

| | | /67-+

| | | | \---- Bienotherium(10)

| | | /-----54-----+

| | | | \-------- Yunnanodon(7)

| | | |

| | | | /---- Fossiomanus(5)

| | | | /100+

| | | | | \---- Polistodon(12)

| | | /100+ /100-+

| | | | | /100+ \-------- Bocatherium(8)

| | | | | | |

| | | | +51-+ \------------- Bienotheroides(9)

| | | | | |

| | | /-------------------------------------------------100-------------------------------------------------+ | \----------------- Kayentatherium(6)

| | | | | |

| | | | | \--------------------- Tritylodon(11)

| | | | |

| | | | \------------------------- Diarthrognathus(14)

| | | |

| | | | /-------- Camurocondylus(13)

| | | | |

| | | | /100-+ /---- Megazostrodon(21)

| | | | | \100+

| | | | /------------------------------------------------100-------------------------------------------------+ \---- Morganucodon(22)

| | | | | |

| | | | | \------------- Dianoconodon(24)

| | | | |

| | | | | /-------------------------------------------------------------------------------------------------------------- Hadrocodium(23)

| | | | | |

| | | | | | /------------------------------ Feredocodon(25)

| | | | | | |

| | | | | | | /------------------------- Shuotherium(26)

| | | | | | /100+ |

| | | | | | | | | /---- BorealestesS(28)

| | | | | | | \100-+ /------100-------+

| | | | | | | | | \---- BorealestesC(29)

| | | | | | | | |

| | | | | | | \100+ /---- Microdocodon(30)

| | | | | | | | /----100-----+

| | | | | | | | | \---- Agilodocodon(35)

| | | | | | /----------------------------------100----------------------------------+ | |

| | | | | | | | \100+ /------------- Docodon(31)

| | | | | | | | | |

| | | | | | | | \100+ /---- Haldanodon(32)

| | | | | | | | | /51-+

| | | | | | | | | | \---- Castorocauda(33)

| | | | | | | | \-85-+

| | | | | | | | \-------- Docofossor(34)

| | | | /100+ | | |

| | | | | | | | \---------------------------------- Pseudotribos(27)

\---+ | | | | | |

| | | | | | | /---- Adalatherium(36)

| | | | | | | /-------------100-------------+

| | | | | | | | \---- Vintana(37)

| | | | | | | |

| | | | | | | | /---- Kuehneodon(49)

| | | | | | | /100+ /-----------100-----------+

| | | | | | | | | | \---- Rugosodon(50)

| | | | | | | | | |

| | | | | | | | | | /---- Jeholbaatar(51)

| | | | | | | | \100+ /--------100---------+

| | | | | | | | | | \---- Sinobaatar(52)

| | | | | | | | | |

| | | | | | | | | | /--------------------- Ptilodus(53)

| | | | | | | | \100-+ |

| | | | | | | | | | /---- Catopsbaatar(54)

| | | | | | | | | | /69-+

| | | | | | | | | | | \---- Nemegtbaatar(56)

| | | | | | | | \100+ /-69-+

| | | | | | | | | /100+ \-------- Chulsanbaatar(55)

| | | | | | | | | | |

| | | | | | | | | | \------------- Kryptobaatar(57)

| | | | | | | | \100+

| | | | \100+ | | | /-------- Yubaatar(58)

| | | | | | /100+ | |

| | | | | | | | \--100---+ /---- Taeniolabis(59)

| | | | | | | | | |

| | | | | | | | \100+---- Lambdopsalis(60)

| | | | | | | | |

| | | | | | | | \---- Sphenopsalis(61)

| | | | | | | |

| | | | | | | | /---- Shenshou lui(40)

| | | | | | | | /------100-------+

| | | | | | | | | \---- Qishou jizantang(45)

| | | | | | | | |

| | | | | | | | | /---- Arboroharamiya jenkinsi(41)

| | | | | | | | | /68-+

| | | | | | /100-+ | /100+ | \---- Ar. allinhopsoni(42)

| | | | | | | | | | | /-56-+

| | | | | | | | | | | /52-+ \-------- Mirusodens caii(46)

| | | | | | | | | | | | |

| | | | | | | | | | | | \------------- Vilevolodon diplomylos(47)

| | | | | | | | \----100-----+ \100+

| | | | | | | | | | /---- Xianshou linglong(43)

| | | | | | | | | \-----74-----+

| | | | | | /---------------------100---------------------+ | | \---- Xianshou songi(44)

| | | | | | | | | |

| | | | | | | | | \------------------------- Maiopatagium furculiferum(48)

| | | | | | | | |

| | | | | | | | | /---- Thomasia antiqua(38)

| | | | | | | | \-----------------100-----------------+

| | | | | | | | \---- Haramiyavia clemmenseni(39)

| | | | | | | |

| | | | | | /100+ \----------------------------------------------- Volaticotherium(71)

| | /100+ | | | | |

| | | | | | | | | /----------------------------------------------------------------------------------------- Tinodon(82)

\100+ | | | | | | | |

| | | | | | | | | /---- Akidolestes(83)

| | | | | | | | | /--------------------------------------100---------------------------------------+

| | | | | | | | | | \---- Spalacotherium(84)

| | | | | | | | | |

| | | | | | | \100+ | /---- Zhangheotherium(85)

| | | | | | | | | /--100---+

| | | | | | | | | | \---- Maotherium(86)

| | | | | | | | | /100+

| | | | | | | | | | | /-------- Origolestes(87)

| | | | | | | \100+ | | |

| | | | | | | | | \100-+ /---- Anebodon(88)

| | | | | | | | /-----------------------------100------------------------------+ \100+

| | | | \100+ | | | | \---- Kiyatherium(90)

| | | | | | | | |

| | | | | | | | \----------------- Lactodens(89)

| | | | | | | |

| | | | | | | | /---- Dryolestes(91)

| | | | | | | | /100+

| | | | | | \-57-+ | \---- Henkelotherium(92)

| | | | | | | /--------------------------------100--------------------------------+

| | | | | | | | \-------- Vincelestes(94)

| | | | | | | |

| | | | | | | | /------------------------------------------------------------------------ Amphitherium(93)

| | | | | | | | |

| | | | | | \100+ | /-------------------------------------------------------------------- Nanolestes(95)

| | | | | | | | |

| | | | | | | | | /--------------------------------------------------------------- Peramus(96)

| | | | | | | | | |

| | | | | | | | | | /---- Sinodelphys(97)

| | | | | | | | | | /-----------------100-----------------+

| | | | | | \100+ | | | \---- Ambolestes(98)

| | | | | | | | | |

| | | | | | | | | | /---- Eomaia(104)

| | | | | | | | | | /-------------100-------------+

| | | | | | | | | | | \---- Prokennalestes(106)

| | | | | | | | | | |

| | | | | | | | | | | /-------- Kennalestes(107)

| | | | | | | | | | | |

| | | /100-+ | | | | | | | /100-+ /---- Asioryctes(108)

| | | | | | | \100+ | | | | \100+

| | | | | | | | | /100-+ | /100+ \---- Ukhaatherium(109)

| | | | | | | | | | | | | |

| | | | | | | | | | | | /100+ \------------- Zalambdalestes(110)

| | | | | | | | | | | /100+ | |

| | | | | | | | | | | | | | | /---- Cimolestes(113)

| | | | | | | | | | | | | | \----100-----+

| | | | | | | | | | | | | /100+ \---- Gypsonictops(114)

| | | | | | | | | | | | | | |

| | | | | | | | | | | | | | | /---- Protungulatum(115)

| | | | | | /100+ | | | | | | | | /53-+

| | | | | | | | | | | | | | /100-+ | | \---- Erinaceus(117)

| | | | | | | | | | /100+ \100+ | | | \----100-----+

| | | | | | | | | | | | | | | | \-------- Leptictis(116)

| | | | | | | | | | | | | \100+ |

| | | | | | | | \100-+ | | | | \------------------------- Uchkudukodon (Daulestes)(111)

| | | | | | | | | | | | |

| | | | | | | | | | | | \------------------------------ Aspanlestes(112)

| | | | | | | | | | | |

| | | | | | | | | | | \-------------------------------------- Juramaia(105)

| | | | | | | | | /100+ |

| | | | | | | | | | | | /------------- Jizantang(100)

| | | | | | | | | | | | |

| | | | | | | | | | | \---------------100---------------+ /-------- Acristatherium(101)

| | | | | | | | | | | | |

| | | | | | | | | | | \100-+ /---- Cokotherium(102)

| | | | | | | | | | | \100+

| | | | | | | | | /100+ | \---- Microtherulum(103)

| | | | | | | | | | | |

| | | | | | | | | | | \--------------------------------------------------- Holoclemensia(118)

| /100+ | | | | | | | | |

| | | | | | | | | | | | /------------------------------------------ Liaodelta(119)

| | | | | | | | | | | | |

| | | | | | | | | | | | | /-------------------------------------- Deltatheridium(120)

| | | | | | | | | | | \-----62-----+ |

| | | | | | | | | | | | | /---------------------------------- Sulestes(121)

| | | | | | | | | | | | | |

| | | | | | | | | | | \100+ | /------------------------- Asiatherium(122)

| | | | | | | | | | | | | |

| | | | | | | | | | | | | | /--------------------- Didelphodon(124)

| | | | | | | | | | | | | /100-+ |

| | | | | | | | | | | \100+ | | | /-------- Mayulestes(125)

| | | | | | | | | \100+ | | | | |

| | | | | | | | | | | | | | /100-+ /---- Pucadelphys(126)

| | | | | | | | | | | | \100+ | \100+

| | | | | | | | | | | | | /100+ \---- Andinodelphys(127)

| | | | | | | | | | | | | | |

| | | | | | | | | | | | | | | /---- Didelphis(128)

| | | | | | | | | | \100+ | | \--100---+

| | | \100+ | | | | | | \100+ \---- Marmosa(129)

| | | | | | | | | | |

| | | | | | | | | | | /---- Caenolestes(130)

| | | | | \100-+ | | | \----100-----+

| | | | | | | | | \---- Dasyurus(131)

| | | | | | | | |

| | | | | | | | \------------------------------ Kokopellia(123)

| | | | | | | |

| | | | | | | \----------------------------------------------------------- Kielantherium(99)

| | | | | | |

| | | | | | | /---- Gobiconodon(72)

| | | | | | | /-----------100-----------+

| | | | | | | | \---- Repenomamus(73)

| | | | | | | |

| | | | | | | | /------------------------- Amphilestes(74)

| | | | | | \-------------------------------100--------------------------------+ |

| | | | | | | | /------------- Yanoconodon(75)

| | | | | | | | |

| | | | | | | | /57-+ /-------- Liaoconodon(76)

| | | | | | \100-+ | | |

\100-+ | | | | | | \100-+ /---- Jueconodon(78)

| | | | | | /100+ \100+

| | | | | | | | \---- Chaoyangodens(79)

| | | | | | | |

| | | | | \100+ \----------------- Jeholodens(77)

| | | | | |

| | | | | | /---- Trioracodon(80)

| | | | | \------100-------+

| | | | | \---- Priacodon(81)

| | | | |

| | | | | /---- Ornithorhynchus(62)

| | | | | /58-+

| | | | | | \---- Obdurodon(70)

| | | | | /100-+

| | | | | /100+ \-------- Tachyglossus(63)

| | | | | | |

| | | | | /100+ \------------- Teinolophos(68)

| | | | | | |

| | | | | /100+ \----------------- Steropodon(69)

| | | | | | |

| | | | | /100-+ \--------------------- Bishops(67)

| | | | | | |

| | | | | /100+ \------------------------- Ausktribosphenos(66)

| | | | | | |

| | | | \-------------------------------100--------------------------------+ \------------------------------ Ambondro(65)

| | | | |

| | | | \---------------------------------- Asfaltomylos(64)

| | | |

| | | \---------------------------------------------------------------------------------------------------------------------- Sinoconodon(20)

| | |

| | \--------------------------------------------------------------------------------------------------------------------------- Pseudotherium(19)

| |

| | /-------- Riograndia(15)

| | |

| \-----------------------------------------------------------100------------------------------------------------------------+ /---- Brasilodon(16)

| \100+

| \---- Brasilitherium(17)

|

\--------------------------------------------------------------------------------------------------------------------------------------- Pachygenelus(18)

Bipartitions found in one or more trees and frequency of occurrence:

1 1 1 11

1 2 3 4 5 6 7 8 9 0 1 2 33

12345678901234567890123456789012345678901234567890123456789012345678901234567890123456789012345678901234567890123456789012345678901 Freq %

----------------------------------------------------------------------------------------------------------------------------------------------------------

...............**.................................................................................................................. 1225 100.00%

..............***.................................................................................................................. 1225 100.00%

.............................................................**......*............................................................. 1225 100.00%

.............................................................**....*.*............................................................. 1225 100.00%

.............................................................**....***............................................................. 1225 100.00%

.............................................................**...****............................................................. 1225 100.00%

.............................................................**..*****............................................................. 1225 100.00%

.............................................................**.******............................................................. 1225 100.00%

.............................................................*********............................................................. 1225 100.00%

...............................................................................**.................................................. 1225 100.00%

.............................................................................**.................................................... 1225 100.00%

...........................................................................*.**.................................................... 1225 100.00%

..........................................................................*****.................................................... 1225 100.00%

..........................................................................*******.................................................. 1225 100.00%

.........................................................................********.................................................. 1225 100.00%

.......................................................................**.......................................................... 1225 100.00%

.......................................................................**********.................................................. 1225 100.00%

.................................................................................................................................** 1225 100.00%

...............................................................................................................................**.. 1225 100.00%

.............................................................................................................................**.... 1225 100.00%

............................................................................................................................***.... 1225 100.00%

............................................................................................................................*****.. 1225 100.00%

............................................................................................................................******* 1225 100.00%

...........................................................................................................................******** 1225 100.00%

.........................................................................................................................*.******** 1225 100.00%

.........................................................................................................................********** 1225 100.00%

........................................................................................................................*********** 1225 100.00%

.......................................................................................................................************ 1225 100.00%

.....................................................................................................**............................ 1225 100.00%

....................................................................................................***............................ 1225 100.00%

...................................................................................................****............................ 1225 100.00%

..................................................................................................................***.............. 1225 100.00%

................................................................................................................**................. 1225 100.00%

...........................................................................................................**...................... 1225 100.00%

..........................................................................................................***...................... 1225 100.00%

..........................................................................................................****..................... 1225 100.00%

..........................................................................................................****..**................. 1225 100.00%

..........................................................................................................****..*****.............. 1225 100.00%

..........................................................................................................*****.*****.............. 1225 100.00%

..........................................................................................................***********.............. 1225 100.00%

.......................................................................................................*.*......................... 1225 100.00%

.......................................................................................................*.************.............. 1225 100.00%

.......................................................................................................**************.............. 1225 100.00%

................................................................................................**................................. 1225 100.00%

................................................................................................**.....**************.............. 1225 100.00%

................................................................................................**.******************.............. 1225 100.00%

................................................................................................**.*******************............. 1225 100.00%

................................................................................................**.******************************** 1225 100.00%

................................................................................................*********************************** 1225 100.00%

...............................................................................................************************************ 1225 100.00%

..............................................................................................************************************* 1225 100.00%

............................................................................................*.************************************* 1225 100.00%

..........................................................................................**....................................... 1225 100.00%

..........................................................................................**.*..................................... 1225 100.00%

..........................................................................................***************************************** 1225 100.00%

.......................................................................................*.*......................................... 1225 100.00%

......................................................................................**.*......................................... 1225 100.00%

....................................................................................**............................................. 1225 100.00%

....................................................................................****.*......................................... 1225 100.00%

....................................................................................******......................................... 1225 100.00%

..................................................................................**............................................... 1225 100.00%

..................................................................................************************************************* 1225 100.00%

.................................................................................************************************************** 1225 100.00%

.....................................**............................................................................................ 1225 100.00%

........................................****.**.................................................................................... 1225 100.00%

.......................................*....*...................................................................................... 1225 100.00%

.......................................********.................................................................................... 1225 100.00%

.......................................*********................................................................................... 1225 100.00%

..........................................................***...................................................................... 1225 100.00%

.........................................................****...................................................................... 1225 100.00%

.....................................................****.......................................................................... 1225 100.00%

.....................................................********...................................................................... 1225 100.00%

....................................................*********...................................................................... 1225 100.00%

..................................................**............................................................................... 1225 100.00%

..................................................***********...................................................................... 1225 100.00%

................................................**................................................................................. 1225 100.00%

................................................*************...................................................................... 1225 100.00%

...................................**.............................................................................................. 1225 100.00%

...................................**...........*************...................................................................... 1225 100.00%

...................................**..**********************...................................................................... 1225 100.00%

...................................**************************...................................................................... 1225 100.00%

...................................**************************.........*............................................................ 1225 100.00%

...................................**************************.........*..........************************************************** 1225 100.00%

...................................**************************.........************************************************************* 1225 100.00%

...................................************************************************************************************************ 1225 100.00%

..............................****................................................................................................. 1225 100.00%

.............................*....*................................................................................................ 1225 100.00%

.............................******................................................................................................ 1225 100.00%

...........................**...................................................................................................... 1225 100.00%

...........................********................................................................................................ 1225 100.00%

.........................*.********................................................................................................ 1225 100.00%

........................**.********................................................................................................ 1225 100.00%

........................***********................................................................................................ 1225 100.00%

........................*********************************************************************************************************** 1225 100.00%

......................*.*********************************************************************************************************** 1225 100.00%

....................**............................................................................................................. 1225 100.00%

............*.......**............................................................................................................. 1225 100.00%

............*.......**.*........................................................................................................... 1225 100.00%

............*.......*************************************************************************************************************** 1225 100.00%

............*......**************************************************************************************************************** 1225 100.00%

............*.....***************************************************************************************************************** 1225 100.00%

....*......*....................................................................................................................... 1225 100.00%

....*..*...*....................................................................................................................... 1225 100.00%

....*..**..*....................................................................................................................... 1225 100.00%

...*********....................................................................................................................... 1225 100.00%

...*********.*..................................................................................................................... 1225 100.00%

...***********....***************************************************************************************************************** 1225 100.00%

...**************.***************************************************************************************************************** 1225 100.00%

...******************************************************************************************************************************** 1225 100.00%

..********************************************************************************************************************************* 1225 100.00%

...............................***................................................................................................. 1039 84.82%

..........................................**....................................................................................... 912 74.45%

.....................................................*.*........................................................................... 843 68.82%

.....................................................***........................................................................... 843 68.82%

........................................**......................................................................................... 838 68.41%

...*.....*......................................................................................................................... 820 66.94%

......................................................................................................................************* 755 61.63%

.............................................................*.......*............................................................. 706 57.63%

..........................................................................**.**.................................................... 702 57.31%

....................................................................................*********************************************** 693 56.57%

........................................**...*..................................................................................... 691 56.41%

...*..*..*......................................................................................................................... 667 54.45%

..................................................................................................................*.*.............. 653 53.31%

........................................**...**.................................................................................... 635 51.84%

....**.**..*....................................................................................................................... 630 51.43%

...............................**.................................................................................................. 623 50.86%

...................................................................................................................**.............. 572 46.69%

....**.**.**....................................................................................................................... 544 44.41%

........................................****..*.................................................................................... 534 43.59%

..................................................................................********......................................... 532 43.43%

..........................................................................*.*...................................................... 523 42.69%

.............................................................**.................................................................... 519 42.37%

..........................................................**....................................................................... 519 42.37%

...*..*..**........................................................................................................................ 483 39.43%

................................................................................................**.*******************.************ 470 38.37%

........................................****....................................................................................... 396 32.33%

......................................................*.*.......................................................................... 382 31.18%

.....................................................**.*.......................................................................... 382 31.18%

..........................................................*.*...................................................................... 372 30.37%

...........................................................**...................................................................... 334 27.27%

...*.**..**........................................................................................................................ 320 26.12%

...***.*****....................................................................................................................... 317 25.88%

................................**................................................................................................. 309 25.22%

...............................*.*................................................................................................. 293 23.92%

.........................................*...*..................................................................................... 249 20.33%

.........**........................................................................................................................ 199 16.24%

....*..**.**....................................................................................................................... 188 15.35%

...*.....**........................................................................................................................ 173 14.12%

....********....................................................................................................................... 167 13.63%

........................................**.*.**.................................................................................... 161 13.14%

........................................***..**.................................................................................... 152 12.41%

..........................................**..*.................................................................................... 138 11.27%

........................................*.**..*.................................................................................... 138 11.27%

..............................**.*................................................................................................. 106 8.65%

......*..*......................................................................................................................... 90 7.35%

.....*....*........................................................................................................................ 87 7.10%

..............................*.*.................................................................................................. 80 6.53%

....*****.**....................................................................................................................... 77 6.29%

....**.*****....................................................................................................................... 65 5.31%

........................................****.*..................................................................................... 56 4.57%

...*******.*....................................................................................................................... 51 4.16%

....**.***.*....................................................................................................................... 22 1.80%

**Strict consensus tree of 1225 trees (PAUP)**

Tree length = 2883

Consistency index (CI) = 0.3434

Homoplasy index (HI) = 0.6566

CI excluding uninformative characters = 0.3411

HI excluding uninformative characters = 0.6589

Retention index (RI) = 0.8170

Rescaled consistency index (RC) = 0.2805

/------------------------------------------------------------------------------------------------------------------------------------------------------------- Thrinaxodon

|

| /-------------------------------------------------------------------------------------------------------------------------------------------------------- Massetognathus

| |

| | /---------------------------------------------------------------------------------------------------------------------------------------------------- Probainognathus

| | |

| | | /------------------ Oligokyphus

| | | |

| | | | /----- Fossiomanus

| | | | /-132

| | | | | \----- Polistodon

| | | | /--133

| | | +-134 \--------- Bocatherium

| | | | |

| | | /--135 \-------------- Bienotheroides

| | | | |

| | | | +------------------ Kayentatherium

| | | | |

| | | | +------------------ Yunnanodon

| | | /------------------------------------------------------------------------------------------------------------136 |

| | | | | +------------------ Bienotherium

| | | | | |

| | | | | \------------------ Tritylodon

| | | | |

| | | | \----------------------- Diarthrognathus

| | | |

| | | | /--------- Camurocondylus

| | | | |

| | | | /--138 /----- Megazostrodon

| | | | | \-137

| | | | /-------------------------------------------------------------------------------------------------------139 \----- Morganucodon

| | | | | |

| | | | | \-------------- Dianoconodon

| | | | |

| | | | | /------------------------------------------------------------------------------------------------------------------- Hadrocodium

| | | | | |

| | | | | | /----------------------- Feredocodon

| | | | | | |

| | | | | | | /------------------ Shuotherium

| | | | | | /--146 |

| | | | | | | | | /----- BorealestesS

| | | | | | | \--145 /------140

| | | | | | | | | \----- BorealestesC

| | | | | | | | |

| | | | | | | | | /----- Microdocodon

| | | | | | | \-144 /-141

| | | | | | | | | \----- Agilodocodon

| | | | | | /--------------------------------------------------------------------------------147 | |

| | | | | | | | \--143 /----- Docodon

| | | | | | | | | |

| | | | | | | | | +----- Haldanodon

| | | | | | | | \-142

| | | | | | | | +----- Castorocauda

| | | | | | | | |

| | | | | | | | \----- Docofossor

| | | | /--233 | | |

| | | | | | | | \---------------------------- Pseudotribos

\--242 | | | | | |

| | | | | | | /----- Adalatherium

| | | | | | | /------------------------148

| | | | | | | | \----- Vintana

| | | | | | | |

| | | | | | | | /----- Kuehneodon

| | | | | | | /--158 /--------------------149

| | | | | | | | | | \----- Rugosodon

| | | | | | | | | |

| | | | | | | | | | /----- Jeholbaatar

| | | | | | | | \-157 /---------------150

| | | | | | | | | | \----- Sinobaatar

| | | | | | | | | |

| | | | | | | | | | /------------------ Ptilodus

| | | | | | | | \--156 |

| | | | | | | | | | /----- Catopsbaatar

| | | | | | | | | | |

| | | | | | | | \--155 +----- Chulsanbaatar

| | | | | | | | | /------151

| | | | | | | | | | +----- Nemegtbaatar

| | | | | | | | | | |

| | | | | | | | | | \----- Kryptobaatar

| | | | | | | | \-154

| | | | \--232 | | | /--------- Yubaatar

| | | | | | /--163 | |

| | | | | | | | \--153 /----- Taeniolabis

| | | | | | | | | |

| | | | | | | | \-152----- Lambdopsalis

| | | | | | | | |

| | | | | | | | \----- Sphenopsalis

| | | | | | | |

| | | | | | | | /----- Shenshou lui

| | | | | | | | /-159

| | | | | | | | | \----- Qishou jizantang

| | | | | | | | |

| | | | | | | | | /----- Arboroharamiya jenkinsi

| | | | | | | | /--161 |

| | | | | | /-165 | | | +----- Ar. allinhopsoni

| | | | | | | | | | | |

| | | | | | | | | | | +----- Xianshou linglong

| | | | | | | | | | \-160

| | | | | | | | | | +----- Xianshou songi

| | | | | | | | \--------------------162 |

| | | | | | | | | +----- Mirusodens caii

| | | | | | | | | |

| | | | | | /------------------------------------------------166 | | \----- Vilevolodon diplomylos

| | | | | | | | | |

| | | | | | | | | \-------------- Maiopatagium furculiferum

| | | | | | | | |

| | | | | | | | | /----- Thomasia antiqua

| | | | | | | | \----------------------------------164

| | | | | | | | \----- Haramiyavia clemmenseni

| | | | | | | |

| | | | | | | \---------------------------------------------- Volaticotherium

| | /--236 | | | /--213

| | | | | | | | | /-------------------------------------------------------------------------------------------- Tinodon

\-241 | | | | | | | |

| | | | | | | | | /----- Akidolestes

| | | | | | | | | /--------------------------------------------------------------------------------167

| | | | | | | | | | \----- Spalacotherium

| | | | | | | | | |

| | | | | | | | | | /----- Zhangheotherium

| | | | | | | \--212 | /------168

| | | | | | | | | | \----- Maotherium

| | | | | | | | | /-171

| | | | | | | | | | | /--------- Origolestes

| | | | | | | | | | | |

| | | | | | | | | | \--170 /----- Anebodon

| | | | | | | | +-------------------------------------------------------------------172 \-169

| | | | \-231 | | | | \----- Kiyatherium

| | | | | | \-211 |

| | | | | | | \------------------ Lactodens

| | | | | | |

| | | | | | | /----- Dryolestes

| | | | | | | /-173

| | | | | | | | \----- Henkelotherium

| | | | | | | /-----------------------------------------------------------------------174

| | | | | | | | \--------- Vincelestes

| | | | | | | |

| | | | | | | | /------------------------------------------------------------------------------ Amphitherium

| | | | | | | | |

| | | | | | \--210 | /-------------------------------------------------------------------------- Nanolestes

| | | | | | | | |

| | | | | | | | | /--------------------------------------------------------------------- Peramus

| | | | | | | | | |

| | | | | | | | | | /----- Sinodelphys

| | | | | | | | | | /--------------------------------------175

| | | | | | \--209 | | | \----- Ambolestes

| | | | | | | | | |

| | | | | | | | | | /----- Eomaia

| | | | | | | | | | /-----------------------------176

| | | | | | | | | | | \----- Prokennalestes

| | | | | | | | | | |

| | | | | | | | | | | /--------- Kennalestes

| | | | | | | | | | | |

| | | /-234 | | | | | | | /--178 /----- Asioryctes

| | | | | | | \-208 | | | | \-177

| | | | | | | | | /--188 | /-179 \----- Ukhaatherium

| | | | | | | | | | | | | |

| | | | | | | | | | | | /--181 \-------------- Zalambdalestes

| | | | | | | | | | | /--186 | |

| | | | | | | | | | | | | | | /----- Cimolestes

| | | | | | | | | | | | | | \----------180

| | | | | | | | | | | | | /--183 \----- Gypsonictops

| | | | | | | | | | | | | | |

| | | | | | | | | | | | | | | /----- Protungulatum

| | | | | | | | | | | | | | | |

| | | | | | /-222 | | | | | | /-184 \---------------182----- Leptictis

| | | | | | | | | | /-192 \-187 | | | |

| | | | | | | | | | | | | | | | \----- Erinaceus

| | | | | | | | | | | | | \--185 |

| | | | | | | | \--207 | | | | \---------------------------- Uchkudukodon (Daulestes)

| | | | | | | | | | | | |

| | | | | | | | | | | | \-------------------------------- Aspanlestes

| | | | | | | | | | | |

| | | | | | | | | | | \------------------------------------------ Juramaia

| | | | | | | | | /--193 |

| | | | | | | | | | | | /-------------- Jizantang

| | | | | | | | | | | | |

| | | | | | | | | | | \----------------------------------191 /--------- Acristatherium

| | | | | | | | | | | | |

| | | | | | | | | | | \--190 /----- Cokotherium

| | | | | | | | | | | \-189

| | | | | | | | | | | \----- Microtherulum

| | | | | | | | | | |

| | | | | | | | | /--205 \------------------------------------------------------- Holoclemensia

| /-239 | | | | | | | | |

| | | | | | | | | | | +------------------------------------------------------------ Liaodelta

| | | | | | | | | | | |

| | | | | | | | | | | | /------------------------------------------ Deltatheridium

| | | | | | | | | | | | |

| | | | | | | | | | | | | /------------------------------------- Sulestes

| | | | | | | | | | | | | |

| | | | | | | | | | | \---------------204 | /---------------------------- Asiatherium

| | | | | | | | | | | | | |

| | | | | | | | | | | | | | /----------------------- Didelphodon

| | | | | | | | | | | | | /-201 |

| | | | | | | | | | | \--203 | | | /--------- Mayulestes

| | | | | | | | | | | | | | | |

| | | | | | | | | \-206 | | | | /--195 /----- Pucadelphys

| | | | | | | | | | | | \--200 | \-194

| | | | | | | | | | | | | /-197 \----- Andinodelphys

| | | | | | | | | | | | | | |

| | | | | | | | | | | | | | | /----- Didelphis

| | | | | | | | | | \--202 | | \------196

| | | \--235 | | | | | | \--199 \----- Marmosa

| | | | | | | | | | |

| | | | | | | | | | | /----- Caenolestes

| | | | | \--230 | | | \----------198

| | | | | | | | | \----- Dasyurus

| | | | | | | | |

| | | | | | | | \-------------------------------- Kokopellia

| | | | | | | |

| | | | | | | \----------------------------------------------------------------- Kielantherium

| | | | | | |

| | | | | | | /----- Gobiconodon

| | | | | | | /--------------------214

| | | | | | | | \----- Repenomamus

| | | | | | | |

| | | | | | | | /----------------------- Amphilestes

| | | | | | \-----------------------------------------------------------------------221 |

| | | | | | | | /-------------- Yanoconodon

| | | | | | | | |

| | | | | | | | | /--------- Liaoconodon

| | | | | | \--220 | |

\--240 | | | | | /-217--216 /----- Jueconodon

| | | | | | | | \-215

| | | | | | | | \----- Chaoyangodens

| | | | | | | |

| | | | | \--219 \-------------- Jeholodens

| | | | | |

| | | | | | /----- Trioracodon

| | | | | \----------218

| | | | | \----- Priacodon

| | | | |

| | | | | /----- Ornithorhynchus

| | | | | |

| | | | | /-223----- Tachyglossus

| | | | | | |

| | | | | /--224 \----- Obdurodon

| | | | | | |

| | | | | /-225 \--------- Teinolophos

| | | | | | |

| | | | | /--226 \-------------- Steropodon

| | | | | | |

| | | | | /--227 \------------------ Bishops

| | | | | | |

| | | | | /-228 \----------------------- Ausktribosphenos

| | | | | | |

| | | | \-----------------------------------------------------------------------229 \---------------------------- Ambondro

| | | | |

| | | | \-------------------------------- Asfaltomylos

| | | |

| | | \----------------------------------------------------------------------------------------------------------------------------- Sinoconodon

| | |

| | \--------------------------------------------------------------------------------------------------------------------------------- Pseudotherium

| |

| | /--------- Riograndia

| | |

| \-------------------------------------------------------------------------------------------------------------------------------238 /----- Brasilodon

| \-237

| \----- Brasilitherium

|

\----------------------------------------------------------------------------------------------------------------------------------------------- Pachygenelus

**Apomorphy lists:**

Branch Character Steps CI Change

----------------------------------------------------------------------------------------------------------------------------------------------------------------------------------------

node_242 <-> Thrinaxodon 19 (Postdentary bone size) 1 0.800 1 <=> 0

24 (Development of the secondary jaw joint) 1 0.250 1 <=> 0

46 (Dentary symphysis) 1 0.500 0 <-> 1

347 (Ventral extension of the deltopectoral crest or the position of the deltoid tuberosity) 1 0.091 0 <=> 1

367 (Number of phalanges present in manual digit III) 1 0.667 1 <-> 0

368 (Number of phalanges present in manual digit IV) 1 0.667 1 <-> 0

369 (Anterior process of the ilium) 1 0.667 1 <=> 0

427 (Proportion of the entocuneiform, mesocuneiform, and ectocuneiform) 1 0.200 0 <-> 1

457 (Contribution of the basisphenoid wing (parasphenoid ala) to the external bony housing of the cochlea) 1 0.333 1 <=> 0

519 (Twisting of the dorsal plate relative to the trochlea on the quadrate) 1 0.600 1 <=> 0

531 (The process for insertion of the stapedius muscle) 1 0.500 1 <=> 0

536 (Ectotympanic size/shape (may be ordered)) 1 0.500 1 <=> 0

544 (Vomer exposure in incisive foramen) 1 1.000 1 <=> 0

545 (Vomer vertical septum extension) 1 0.500 1 <=> 0

553 (Ectopterygoid) 1 0.500 1 <=> 0

571 (Fully ossified medial orbital wall of the orbitosphenoid) 1 0.500 1 <=> 0

node_242 --> Massetognathus 7 (Groove for the replacement dental lamina) 1 0.200 0 ==> 1

65 (Upper canine - presence vs. absence) 1 0.200 0 ==> 1

138 (Development of three distinct main cusps on molar.) 1 0.400 1 ==> 0

197 (Postcanine occlusion) 1 0.400 0 ==> 1

216 (Development of three distinct main cusps in lower molar) 1 0.500 1 ==> 0

267 (Outline of the lower second molar crown (in crown view)) 1 0.333 0 --> 3

282 (Topographic relationships of wear facets to the main cusps) 1 0.500 0 ==> 1

334 (Procoracoid) 1 0.200 0 ==> 1

459 (Internal carotid foramina in basisphenoid) 1 0.333 0 ==> 1

517 (Geometry (shape) of the incudo-mallear contact) 1 0.571 0 ==> 1

555 (Carotid foramen position) 1 0.400 0 ==> 2

606 (Encephalization quotient) 1 0.500 0 ==> 1

node_242 --> node_241 59 (Number of lower incisors) 1 0.167 1 --> 0

74 (Upper postcanine teeth differentiated into premolariforms and molariforms) 1 0.500 0 --> 1

107 (Lower postcanine teeth differentiated into premolariform and molar(iform) teeth) 1 0.600 0 --> 1

136 (Total number of upper postcanine loci) 1 0.269 2 ==> 0

208 (Total number of lower postcanine loci) 1 0.200 0 ==> 1

375 (Obturator foramen) 1 0.250 0 --> 1

465 (Cochlea) 1 0.625 0 --> 1

529 (Ratio of stapes length to skull length) 1 1.000 0 --> 1

node_241 --> Probainognathus 329 (Curvature of the clavicle) 1 0.167 0 ==> 1

491 (Relationship of the lateral flange to the crista parotica) 1 0.400 0 ==> 1

node_241 --> node_240 8 (Angular process, presence absent) 1 0.100 0 ==> 1
[truncated: 233,287 more chars]
